# Supplementary material for: Environmentally sensitive hotspots in the methylome of the early human embryo
Source: eLife journal article supplement (doi:10.7554/elife.72031), 2022-02-21
Supplement: supp [file elife-72031-supp-v1.zip]

Archive with 19 entries (19 files):
- elife_poa_e72031_Supplementary_file_1.xlsx
- elife_poa_e72031_Transparent_Reporting_File.docx
- elife_poa_e72031_Appendix_1_figure_1.pdf
- elife_poa_e72031_Appendix_1_figure_2.pdf
- elife_poa_e72031_Appendix_1_figure_3.pdf
- elife_poa_e72031_Appendix_1_figure_4.pdf
- elife_poa_e72031_Appendix_1_figure_5.pdf
- elife_poa_e72031_Appendix_1_figure_6.pdf
- elife_poa_e72031_Appendix_1_figure_7.pdf
- elife_poa_e72031_Appendix_1_figure_8.pdf
- elife_poa_e72031_Appendix_1_figure_9.pdf
- elife_poa_e72031_Appendix_1_figure_10.pdf
- elife_poa_e72031_Appendix_1_figure_11.pdf
- elife_poa_e72031_Appendix_1_figure_12.pdf
- elife_poa_e72031_Appendix_1_figure_13.png
- elife_poa_e72031_Appendix_1_figure_14.pdf
- elife_poa_e72031_Appendix_1_figure_15.pdf
- elife_poa_e72031_Appendix_1_figure_16.pdf
- elife_poa_e72031_Appendix_1_figure_17.pdf
