# Supplementary material for: Environmentally sensitive hotspots in the methylome of the early human embryo
Source: eLife journal article supplement (doi:10.7554/elife.72031), 2022-02-21

month of conception

D  
N  
O  
S  
A  
J  
J  
M  
A  
M  
F  
J

ENID (2yr)

EMPHASIS (7–9yr)

SoC/ME

SoC/non-ME

matched  
controls

random  
controls

SoC/ME

SoC/non-ME

matched  
controls

random  
controls

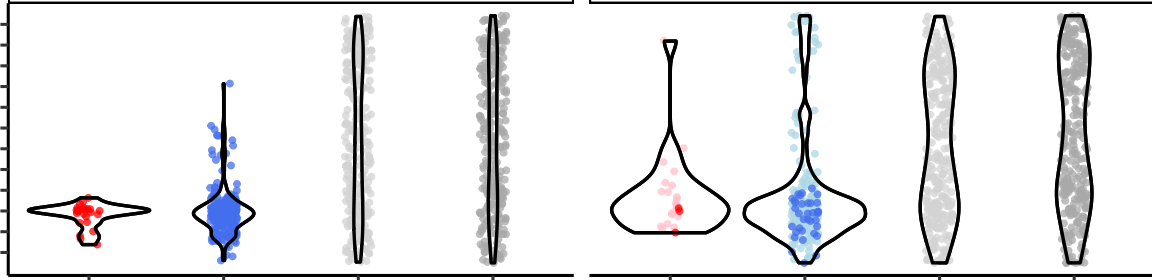

Supplement: supp [file elife-72031-supp-v1.zip]
