# Supplementary material for: Environmentally sensitive hotspots in the methylome of the early human embryo
Source: eLife journal article supplement (doi:10.7554/elife.72031), 2022-02-21
Supplement: supp [file elife-72031-supp-v1.zip › elife_poa_e72031_Appendix_1_figure_14.pdf]

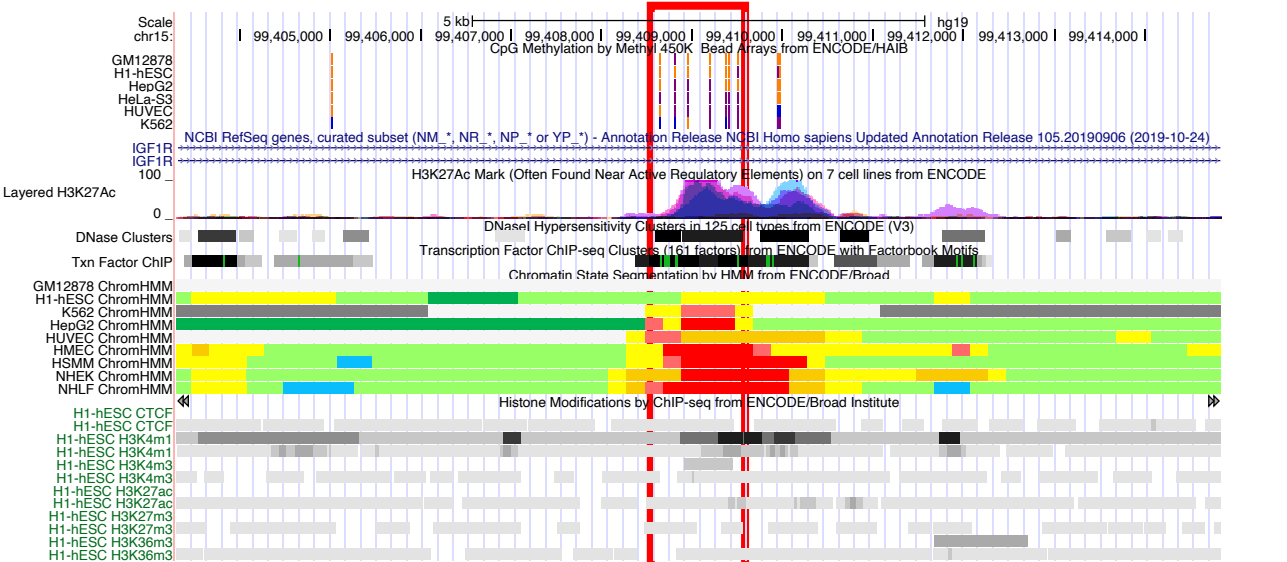

- State 1 - **Bright Red** - Active Promoter
- State 2 - **Light Red** - Weak Promoter
- State 3 - **Purple** - Inactive/poised Promoter
- State 4 - **Orange** - Strong enhancer
- State 5 - **Orange** - Strong enhancer
- State 6 - **Yellow** - Weak/poised enhancer
- State 7 - **Yellow** - Weak/poised enhancer
- State 8 - **Blue** - Insulator
- State 9 - **Dark Green** - Transcriptional transition
- State 10 - **Dark Green** - Transcriptional elongation
- State 11 - **Light Green** - Weak transcribed
- State 12 - **Gray** - Polycomb-repressed
- State 13 - **Light Gray** - Heterochromatin; low signal
- State 14 - **Light Gray** - Repetitive/Copy Number Variation
- State 15 - **Light Gray** - Repetitive/Copy Number Variation
