# Supplementary material for: Environmentally sensitive hotspots in the methylome of the early human embryo
Source: eLife journal article supplement (doi:10.7554/elife.72031), 2022-02-21
Supplement: supp [file elife-72031-supp-v1.zip › elife_poa_e72031_Supplementary_file_1.xlsx]

## Sheet: Contents
SUPPLEMENTARY FILE1 CONTENTS
1a	ENID SoC-associated CpGs (no amplitude filter applied)
1b	Seasonal amplitude tests
1c	Inter-cohort change in SoC amplitude at ENID SoC-associated CpGs
1d	SoC-CpGs (ENID SoC-associated CpGs with SoC methylation amplitude >=4%)
1e	SoC-CpG clusters and singletons
1f	SoC-CpG cluster sizes
1g	SoC-CpG enrichment for MEs and overlap with ME sub-classes
1h	SoC-CpG enrichment for gDMRs and parent-of-origin specific methylation
1i	SoC-CpGs overlapping maternally methylated germline DMRs
1j	SoC-CpGs mQTL and their association with SoC
1k	Candidate genes previously associated with periconception / gestational exposures overlapping array background
1l	Look-up of SoC-CpGs in the EWAS Catalog
1m	EWAS Catalog data grouped by trait
1n	SoC-CpG associations with selected variables measured in the ENID 2yr dataset
1o	Look-up of SoC-CpGs in the GWAS Catalog
1p	ENID (2yr): Association test p-values to detect potential residual confounding
1q	EMPHASIS (7-9yr): Association test p-values to detect potential residual confounding
1r	ENID 5-7yr: Association test p-values to detect potential residual confounding
1s	ENID (2yr): Cell count, batch, village sensitivity analyses

## Sheet: Key
KEY
Note all genomic coordinates are hg19
cpg	Illumina CpG identifier
chr	chromosome
loc	CpG location (hg19)
ME	metastable epiallele (see Table 2)
ME.100bp	ME within 100bp
oo.gDMR	oocyte gDMR
oo.blast.gDMR	oocyte gDMR persisting in bloastocyst
oo.blast.plac.gDMR	oocyte gDMR persisting in blastocyst and placenta
sp.gDMR	sperm gDMR
sp.blast.gDMR	sperm gDMR persisting in blastocyst
zink.PofOm	parent of origin-specific locus from Zink et al (see Table 2)
teh.gxe	GxE locus from Teh et al (see Table 2)
enid.2yr.max.doc.theta	ENID 2yr date of conception (radians) at methylation maximum
enid.2yr.min.doc.theta	ENID 2yr date of conception (radians) at methylation maximum
enid.2yr.amplitude	ENID 2yr modelled methylation amplitude
enid.2yr.lrt.pval	ENID 2yr likelihood ratio test p-value
enid.2yr.lrt.fdr	ENID 2yr likelihood ratio test false discovery rate
emph.max.doc.theta	date of conception (radians) at methylation maximum in EMPHASIS cohort
emph.min.doc.theta	date of conception (radians) at methylation maximum in EMPHASIS cohort
emph.amplitude	modelled methylation amplitude in EMPHASIS cohort
emph.lrt.pval	EMPHASIS likelihood ratio test p-value
emph.lrt.fdr	EMPHASIS likelihood ratio test false discovery rate
enid.5-7yr.max.doc.theta	ENID 5-7yr date of conception (radians) at methylation maximum
enid.5-7yr.min.doc.theta	ENID 5-7yr date of conception (radians) at methylation maximum
enid.5-7yr.amplitude	ENID 5-7yr modelled methylation amplitude
enid.5-7yr.lrt.pval	ENID 5-7yr likelihood ratio test p-value
enid.5-7yr.lrt.fdr	ENID 5-7yr likelihood ratio test false discovery rate
UCSC_RefGene_450k	Gene annotation from Illumina manifest
n.test.cgs	number of CpGs in CpG-wise test set
OR.cg	CpG-wise odds ratio
p.value.cg	CpG-wise enrichment p-value
n.test.cgs.clust	number of CpGs in cluster-wise test set
OR.clust	cluster-wise odds ratio
p.value.clust	cluster-wise enrichment p-value
snp	SNP ID
cg.chr	CpG chromosome
cg.loc	CpG location (bp; hg19: Illumina manifest)
mQTL.chr	mQTL chromsome
mQTL.loc	mQTL location (bp)
mQTL.type	mQTL type: cis or trans
REF	SNP reference allele
ALT	SNP alternate allele
ALT_FREQS	SNP alternate allele frequency
beta	regression coefficient from CpG-SNP (mQTL) association analysis
stats	mQTL analyais test statistc
pvalue	mQTL analysis p-value
CHISQ	test stastic for mQTL-SoC association analysis
P	p-value for mQTL-SoC association analysis
OR	odds ratio (allelic model) for mQTL-SoC association analysis

## Sheet: 1a
ENID SoC-associated CpGs (no amplitude filter applied)
cpg	chr	loc	ME	ME.100bp	oo.gDMR	oo.blast.gDMR	oo.blast.plac.gDMR	sp.gDMR	sp.blast.gDMR	zink.PofOm	enid.max.doc.theta	enid.min.doc.theta	enid.amplitude	enid.lrt.pval	enid.lrt.fdr	emph.max.doc.theta	emph.min.doc.theta	emph.amplitude	emph.lrt.pval	emph.lrt.fdr	UCSC_RefGene_Group	Enhancer	Relation_to_UCSC_CpG_Island	UCSC_RefGene_450k
cg15260978	1	1685832	FALSE	FALSE	FALSE	FALSE	FALSE	FALSE	FALSE	FALSE	0.86	4	0.0243064	5.77793e-06	0.0146581	0.62	3.76	0.00681051	0.279597	0.581925	Body	NA	Island	NADK
cg26342907	1	1687532	FALSE	FALSE	FALSE	FALSE	FALSE	FALSE	FALSE	FALSE	4.72	1.58	0.00173132	2.60824e-05	0.0286497	3.78	0.64	0.000480132	0.293743	0.601586	Body	NA	S_Shore	NADK
cg04260676	1	1774322	FALSE	FALSE	FALSE	FALSE	FALSE	FALSE	FALSE	FALSE	5.88	2.74	0.0430542	4.72947e-05	0.0363932	2.36	5.5	0.00754257	0.627986	0.823026	5'UTR	TRUE		GNB1
cg10696969	1	3104042	FALSE	FALSE	FALSE	FALSE	FALSE	TRUE	FALSE	FALSE	0.94	4.08	0.014926	8.39446e-05	0.0463285	1.52	4.66	0.00165783	0.965047	0.987996	Body;Body	NA	N_Shore	PRDM16
cg07797660	1	3239139	FALSE	FALSE	FALSE	FALSE	FALSE	FALSE	FALSE	FALSE	1.74	4.88	0.0243103	6.39603e-05	0.0427078	1.12	4.26	0.00827045	0.60554	0.811613	Body;Body	NA	N_Shore	PRDM16
cg11798758	1	5957004	FALSE	FALSE	FALSE	FALSE	FALSE	FALSE	FALSE	FALSE	5.16	2.02	0.00814734	8.54634e-05	0.0467678	2.98	6.12	0.00173615	0.0850169	0.299509	Body	NA		NPHP4
cg22361543	1	7757378	FALSE	FALSE	FALSE	FALSE	FALSE	FALSE	FALSE	FALSE	1.24	4.38	0.012073	4.34571e-05	0.0352714	4.86	1.72	0.00975199	0.182418	0.454064	Body	NA		CAMTA1
cg25940513	1	9326282	FALSE	FALSE	FALSE	FALSE	FALSE	FALSE	FALSE	FALSE	2.3	5.44	0.0266702	4.30743e-05	0.0351263	0.4	3.54	0.00516637	0.670075	0.845202	3'UTR	NA	S_Shore	H6PD
cg04163216	1	9777888	FALSE	FALSE	FALSE	FALSE	FALSE	FALSE	FALSE	FALSE	1.16	4.3	0.00448909	5.93803e-05	0.0411061	4.66	1.52	0.00212489	0.883297	0.959508	Body	NA	S_Shore	PIK3CD
cg21141856	1	16565106	FALSE	FALSE	FALSE	FALSE	FALSE	TRUE	FALSE	FALSE	5.68	2.54	0.00627242	2.4231e-05	0.0283404	4.76	1.62	0.00228028	0.0636855	0.249543	TSS1500	NA	S_Shore	C1orf89
cg13426876	1	18691894	FALSE	FALSE	FALSE	FALSE	FALSE	TRUE	FALSE	FALSE	4.72	1.58	0.0182634	1.65831e-05	0.0227982	1.94	5.08	0.00234154	0.897819	0.963853	Body	NA	Island	IGSF21
cg21913775	1	19440932	FALSE	FALSE	FALSE	FALSE	FALSE	FALSE	FALSE	FALSE	5.32	2.16	0.0162915	2.62785e-05	0.0287606	6.14	3	0.00288274	0.1505	0.414278	Body	NA		UBR4
cg02107304	1	27693348	FALSE	FALSE	FALSE	FALSE	FALSE	FALSE	FALSE	FALSE	4.1	0.96	0.00528436	9.14854e-05	0.0479983	4	0.86	0.00208954	0.59984	0.80679	TSS200	NA	S_Shore	MAP3K6
cg06155303	1	29460817	FALSE	FALSE	FALSE	FALSE	FALSE	FALSE	FALSE	FALSE	4.82	1.68	0.0474991	9.12689e-06	0.0186252	4.36	1.2	0.0380874	0.169382	0.44016		NA	Island
cg09264065	1	29460936	FALSE	FALSE	FALSE	FALSE	FALSE	FALSE	FALSE	FALSE	4.44	1.3	0.0512952	3.46862e-05	0.0324356	4.34	1.2	0.0225683	0.204062	0.486706		NA	Island
cg00107241	1	29461070	FALSE	FALSE	FALSE	FALSE	FALSE	FALSE	FALSE	FALSE	4.7	1.56	0.0573867	2.16506e-05	0.0264268	4.22	1.08	0.0314917	0.0424695	0.195309		NA	Island
cg09369954	1	32663763	FALSE	FALSE	FALSE	FALSE	FALSE	FALSE	FALSE	FALSE	2.32	5.46	0.0131806	8.69967e-05	0.0473708	2.9	6.04	0.00488029	0.368198	0.662091	3'UTR	TRUE	N_Shelf	TXLNA
cg17327404	1	33231109	FALSE	FALSE	TRUE	FALSE	FALSE	FALSE	FALSE	FALSE	2.3	5.44	0.0149525	2.51892e-05	0.0285924	2.08	5.22	0.00312484	0.828549	0.931663	Body	NA		KIAA1522
cg03167369	1	35658023	FALSE	FALSE	FALSE	FALSE	FALSE	FALSE	FALSE	FALSE	0.8	3.94	0.00442154	5.52277e-05	0.0391302	2.3	5.44	0.0033266	0.7599	0.889639	1stExon	NA	Island	SFPQ
cg22799499	1	40773045	FALSE	FALSE	FALSE	FALSE	FALSE	FALSE	FALSE	FALSE	1.72	4.86	0.0234403	2.71233e-05	0.0290607	0.38	3.52	0.00302552	0.274739	0.574174	Body	NA	S_Shelf	COL9A2
cg22875872	1	44031756	FALSE	FALSE	TRUE	TRUE	FALSE	FALSE	FALSE	FALSE	3.78	0.62	0.0542973	4.50203e-05	0.0358528	5.08	1.94	0.0246804	0.0330059	0.165677	Body;Body	NA	Island	PTPRF
cg10881128	1	44031826	FALSE	FALSE	TRUE	TRUE	FALSE	FALSE	FALSE	FALSE	3.54	0.4	0.0509765	9.17496e-08	0.00189204	4.96	1.82	0.0129332	0.342422	0.636631	Body;Body	NA	Island	PTPRF
cg19692314	1	45042285	FALSE	FALSE	FALSE	FALSE	FALSE	TRUE	FALSE	FALSE	1.9	5.06	0.0185078	6.397e-05	0.0427078	0.96	4.1	0.0118995	0.00618439	0.0650632	Body	TRUE		RNF220
cg07173823	1	45190519	FALSE	FALSE	FALSE	FALSE	FALSE	FALSE	FALSE	FALSE	6.24	3.1	0.0434333	6.55225e-05	0.0428215	5.18	2.04	0.0087478	0.438362	0.710285	Body	NA	Island	C1orf228
cg21268223	1	45988910	FALSE	FALSE	FALSE	FALSE	FALSE	FALSE	FALSE	FALSE	4.12	0.98	0.00822935	8.26132e-05	0.0463285	5.22	2.08	0.00242645	0.0919792	0.315357	TSS1500;TSS1500;TSS1500	NA	S_Shore	PRDX1
cg16116949	1	46763858	FALSE	FALSE	FALSE	FALSE	FALSE	FALSE	FALSE	FALSE	5.2	2.06	0.0115746	2.09418e-05	0.0260846	3.34	0.2	0.000896542	0.960884	0.987996	Body	NA	N_Shelf	LRRC41
cg20822884	1	49240625	FALSE	FALSE	FALSE	FALSE	FALSE	FALSE	FALSE	FALSE	0.8	3.94	0.0348189	6.95188e-07	0.00517098	0.48	3.62	0.00959244	0.213674	0.501841	Body;Body	NA	N_Shore	BEND5 AGBL4
cg03814321	1	51810337	FALSE	FALSE	FALSE	FALSE	FALSE	FALSE	FALSE	FALSE	4.42	1.28	0.0275	1.71918e-05	0.0231477	4.68	1.54	0.0287966	1.04185e-05	0.0012831	Body	TRUE	Island	TTC39A
cg11957884	1	53306243	FALSE	FALSE	FALSE	FALSE	FALSE	FALSE	FALSE	FALSE	1.98	5.12	0.0190184	7.53446e-05	0.0441734	4.36	1.22	0.00223893	0.34721	0.641581		NA	N_Shelf
cg22485350	1	57888059	FALSE	FALSE	FALSE	FALSE	FALSE	FALSE	FALSE	FALSE	2.44	5.58	0.00220103	6.73103e-05	0.042953	1.94	5.08	0.000762914	0.370762	0.662417	5'UTR	NA	Island	DAB1
cg22803724	1	61542917	FALSE	FALSE	FALSE	FALSE	FALSE	FALSE	FALSE	FALSE	4.36	1.22	0.00798383	6.31347e-06	0.0153664	0.12	3.26	0.00139932	0.590309	0.801786	TSS200	NA	S_Shore	NFIA
cg27353619	1	61549542	FALSE	FALSE	FALSE	FALSE	FALSE	FALSE	FALSE	FALSE	1.28	4.42	0.0179975	4.25749e-05	0.0350538	3.84	0.7	0.00394422	0.318968	0.624003	Body;Body;Body;Body	NA	Island	NFIA
cg16618003	1	65432492	FALSE	FALSE	FALSE	FALSE	FALSE	FALSE	FALSE	FALSE	3.94	0.8	0.00570447	8.89967e-05	0.0476722	0.22	3.36	0.00240809	0.401551	0.687414	TSS1500	NA	Island	JAK1
cg00292636	1	67169989	FALSE	FALSE	FALSE	FALSE	FALSE	TRUE	FALSE	FALSE	4.46	1.32	0.0113181	6.48561e-05	0.0427265	5.46	2.32	0.0012195	0.995256	0.99754	Body	TRUE		SGIP1
cg19766489	1	78511344	FALSE	FALSE	FALSE	FALSE	FALSE	FALSE	FALSE	FALSE	4.68	1.54	0.0341088	6.67879e-05	0.0428911	2.76	5.9	0.00505246	0.924255	0.982232	TSS1500	NA	N_Shore	GIPC2
cg06444730	1	84544284	FALSE	FALSE	FALSE	FALSE	FALSE	FALSE	FALSE	FALSE	4.26	1.12	0.00359229	4.75693e-06	0.013506	6.2	3.06	0.000563288	0.440394	0.710285	Body;Body	NA	S_Shore	PRKACB
cg13388692	1	86081680	FALSE	FALSE	FALSE	FALSE	FALSE	FALSE	FALSE	FALSE	3.84	0.7	0.0689165	1.64048e-06	0.00765194	2.44	5.58	0.0188669	0.67643	0.848637		NA	N_Shore
cg24439713	1	86081713	FALSE	FALSE	FALSE	FALSE	FALSE	FALSE	FALSE	FALSE	3.22	0.06	0.0412299	2.36319e-05	0.0279447	2.18	5.34	0.0113594	0.433142	0.710285		NA	Island
cg26831811	1	86862111	FALSE	FALSE	FALSE	FALSE	FALSE	FALSE	FALSE	FALSE	4.58	1.44	0.00271715	7.68992e-05	0.0445227	0.16	3.3	0.000520289	0.443928	0.710285	TSS200;TSS200	NA	S_Shore	ODF2L
cg24115061	1	91298006	FALSE	FALSE	FALSE	FALSE	FALSE	FALSE	FALSE	FALSE	4.82	1.68	0.0188845	5.85482e-05	0.0408747	4.86	1.72	0.0134009	0.650281	0.833749		NA	N_Shelf
cg06176691	1	93938528	FALSE	FALSE	FALSE	FALSE	FALSE	FALSE	FALSE	FALSE	1.9	5.04	0.0111856	8.06359e-06	0.017078	2.38	5.52	0.00273332	0.41804	0.700993	Body;Body;Body	TRUE		FNBP1L
cg17034109	1	110036417	FALSE	FALSE	FALSE	FALSE	FALSE	FALSE	FALSE	FALSE	2.14	5.3	0.0197566	9.54118e-05	0.0489957	5.96	2.82	0.00224168	0.719708	0.8732	TSS1500;TSS1500;TSS1500;TSS1500;TSS1500	NA	N_Shore	CYB561D1
cg05708536	1	113285118	FALSE	TRUE	FALSE	FALSE	FALSE	FALSE	FALSE	FALSE	4.1	0.96	0.0790268	2.59765e-05	0.0286497	4.54	1.4	0.0426808	0.00499639	0.0588849		NA	N_Shore
cg25707805	1	113285387	FALSE	TRUE	FALSE	FALSE	FALSE	FALSE	FALSE	FALSE	4.14	1	0.0633589	1.19033e-06	0.00675922	4.6	1.46	0.0372515	0.0186015	0.119049		NA	N_Shore
cg03899315	1	117149598	FALSE	FALSE	FALSE	FALSE	FALSE	FALSE	FALSE	FALSE	5.04	1.9	0.0151891	4.68262e-05	0.0362029	5.6	2.46	0.00338374	0.736249	0.877658	Body;Body	NA		IGSF3
cg00397989	1	151251191	FALSE	FALSE	FALSE	FALSE	FALSE	FALSE	FALSE	FALSE	5	1.86	0.00734897	9.47159e-05	0.0487668	5.48	2.34	0.00136584	0.272482	0.574174		NA	N_Shelf
cg19086093	1	151739321	FALSE	FALSE	FALSE	FALSE	FALSE	FALSE	FALSE	FALSE	5.08	1.92	0.00815655	4.83015e-05	0.0367439	2.4	5.54	0.00107484	0.797392	0.912538	Body;1stExon	NA	S_Shelf	OAZ3
cg15467116	1	153332972	FALSE	FALSE	FALSE	FALSE	FALSE	TRUE	FALSE	FALSE	0.54	3.68	0.0207404	3.82673e-05	0.0333792	0.6	3.74	0.00335487	0.333092	0.635046	Body	NA		S100A9
cg01637734	1	157811303	FALSE	FALSE	FALSE	FALSE	FALSE	FALSE	FALSE	FALSE	4.98	1.84	0.0106412	5.79867e-06	0.0146581	2.34	5.48	0.00144775	0.135675	0.390257	Body	NA		CD5L
cg24642483	1	159261560	FALSE	FALSE	FALSE	FALSE	FALSE	FALSE	FALSE	FALSE	4.94	1.8	0.0273225	4.04495e-05	0.0344629	0.9	4.04	0.00563628	0.235904	0.531156	5'UTR	NA		FCER1A
cg10888244	1	161049543	FALSE	FALSE	FALSE	FALSE	FALSE	FALSE	FALSE	FALSE	4.04	0.9	0.038926	7.89975e-05	0.04512	4.08	0.94	0.0204636	0.0325409	0.165677	Body	NA	Island	PVRL4
cg21451906	1	161192549	FALSE	FALSE	FALSE	FALSE	FALSE	TRUE	FALSE	FALSE	1.84	4.98	0.0221195	1.14468e-05	0.0201122	1.44	4.58	0.00508393	0.592934	0.801786	Body	NA		APOA2
cg16136262	1	169429604	FALSE	FALSE	FALSE	FALSE	FALSE	FALSE	FALSE	FALSE	4.34	1.2	0.0161925	1.95102e-05	0.0252289	4.88	1.74	0.00771895	0.116253	0.356523		TRUE
cg11344217	1	186096558	FALSE	FALSE	FALSE	FALSE	FALSE	FALSE	FALSE	FALSE	2.72	5.86	0.00936299	3.83361e-05	0.0333792	4.2	1.06	0.000907113	0.929	0.982232	Body;Body	NA		HMCN1 MIR548F1
cg22942576	1	201476775	FALSE	FALSE	FALSE	FALSE	FALSE	FALSE	FALSE	FALSE	2.24	5.38	0.0204149	7.24502e-05	0.0435643	2.76	5.9	0.00659348	0.233342	0.528633	TSS1500;TSS1500	NA	S_Shore	CSRP1
cg06621080	1	201631166	FALSE	FALSE	FALSE	FALSE	FALSE	TRUE	FALSE	FALSE	2.14	5.28	0.0291938	1.11046e-06	0.00639846	1.38	4.52	0.0045472	0.371844	0.66259	Body	TRUE		NAV1
cg04896437	1	202076492	FALSE	FALSE	FALSE	FALSE	FALSE	FALSE	FALSE	FALSE	1.1	4.24	0.0145783	4.13451e-05	0.0348378	4.06	0.92	0.00262184	0.644631	0.832061		TRUE
cg05785988	1	204655147	FALSE	FALSE	FALSE	FALSE	FALSE	FALSE	FALSE	FALSE	2.22	5.36	0.0211421	2.20222e-05	0.026797	1.64	4.78	0.00222723	0.603023	0.809654	TSS1500;TSS1500	NA	S_Shore	LRRN2
cg25213452	1	206630385	FALSE	FALSE	FALSE	FALSE	FALSE	FALSE	FALSE	FALSE	2.04	5.18	0.029004	6.65828e-08	0.00162904	5.9	2.76	0.00387533	0.864433	0.953857	Body;Body	TRUE		SRGAP2
cg07139026	1	212786822	FALSE	FALSE	FALSE	FALSE	FALSE	TRUE	FALSE	FALSE	5.28	2.14	0.00870883	4.21555e-05	0.0350485	0.46	3.6	0.00337719	0.215527	0.503114	5'UTR;5'UTR;5'UTR	TRUE	S_Shelf	ATF3
cg14468913	1	218338809	FALSE	FALSE	FALSE	FALSE	FALSE	FALSE	FALSE	FALSE	4.78	1.64	0.0110456	1.45962e-05	0.0217452	2.76	5.9	0.000574655	0.73556	0.877658		NA	Island
cg08111158	1	227746191	FALSE	FALSE	FALSE	FALSE	FALSE	FALSE	FALSE	FALSE	4.58	1.44	0.0528012	2.5635e-05	0.0285924	4.16	1.02	0.0147399	0.334527	0.635046		NA	Island
cg14789818	1	227748712	FALSE	FALSE	FALSE	FALSE	FALSE	FALSE	FALSE	FALSE	4.32	1.18	0.0630337	4.96594e-05	0.0369208	4.66	1.52	0.0305144	0.0284689	0.155065		NA	Island
cg00907549	1	236768366	FALSE	FALSE	FALSE	FALSE	FALSE	FALSE	FALSE	FALSE	4.48	1.34	0.0350348	1.11005e-06	0.00639846	4.68	1.54	0.0122751	0.239636	0.531908	TSS1500	NA	S_Shore	HEATR1
cg00611192	1	249151633	FALSE	FALSE	FALSE	FALSE	FALSE	FALSE	FALSE	FALSE	1.52	4.66	0.0212121	1.83803e-05	0.0240858	5.26	2.12	0.00732869	0.0671422	0.259122	Body;Body	TRUE	N_Shore	ZNF692
cg27430369	2	503745	FALSE	FALSE	FALSE	FALSE	FALSE	FALSE	FALSE	FALSE	5.06	1.92	0.0125477	7.68183e-05	0.0445227	1.08	4.22	0.000522963	0.618989	0.818757		NA	Island
cg09618102	2	1747364	FALSE	FALSE	FALSE	FALSE	FALSE	FALSE	FALSE	FALSE	2.14	5.28	0.00863028	7.17907e-05	0.0435643	1.48	4.62	0.00115256	0.402258	0.687414	Body	NA	Island	PXDN
cg15309953	2	5813258	FALSE	FALSE	FALSE	FALSE	FALSE	FALSE	FALSE	FALSE	4.66	1.52	0.056498	1.35496e-05	0.0213111	5.2	2.04	0.0197432	0.259506	0.561411		NA	N_Shore
cg11241151	2	11123476	FALSE	FALSE	FALSE	FALSE	FALSE	FALSE	FALSE	FALSE	3.86	0.7	0.0424551	7.5594e-05	0.0441734	4.58	1.44	0.0133458	0.264513	0.570636		TRUE
cg03257743	2	11123616	FALSE	FALSE	FALSE	FALSE	FALSE	FALSE	FALSE	FALSE	4.06	0.92	0.0605616	1.74147e-05	0.0232873	4.08	0.94	0.0235125	0.106573	0.348289		TRUE
cg26462586	2	11164677	FALSE	FALSE	FALSE	FALSE	FALSE	FALSE	FALSE	FALSE	4.32	1.18	0.0220685	1.6384e-05	0.022788	2.24	5.38	0.0062238	0.389683	0.675569		TRUE
cg20347268	2	24307657	FALSE	FALSE	TRUE	TRUE	FALSE	FALSE	FALSE	FALSE	5.08	1.94	0.00405272	5.40056e-05	0.038684	2.44	5.58	0.0016159	0.657782	0.8363	1stExon;5'UTR;TSS200	NA	Island	TP53I3
cg18587476	2	24397810	FALSE	FALSE	FALSE	FALSE	FALSE	FALSE	FALSE	FALSE	4.26	1.12	0.0597873	4.42301e-05	0.0355851	4.44	1.3	0.0287748	0.0011968	0.0248417	TSS200	NA	Island	C2orf84
cg27063607	2	27994684	FALSE	FALSE	FALSE	FALSE	FALSE	FALSE	FALSE	FALSE	1.68	4.82	0.00180156	8.33627e-05	0.0463285	3.42	0.28	0.000120359	0.874618	0.958214	Body;Body	NA	Island	MRPL33
ch.2.729349R	2	29496277	FALSE	FALSE	FALSE	FALSE	FALSE	FALSE	FALSE	FALSE	1.34	4.48	0.00208251	7.5599e-05	0.0441734	2.86	6	0.000230301	0.498046	0.751472	NA	NA	NA	NA
cg02162897	2	38300537	FALSE	FALSE	FALSE	FALSE	FALSE	FALSE	FALSE	FALSE	5.06	1.92	0.0327201	7.09317e-05	0.043493	0.6	3.74	0.00936413	0.515396	0.765617	Body	NA	N_Shore	CYP1B1
cg27300813	2	45026126	FALSE	FALSE	FALSE	FALSE	FALSE	FALSE	FALSE	FALSE	4.86	1.7	0.00647205	6.82227e-06	0.0157239	5.88	2.74	0.00257325	0.0280739	0.154005		TRUE	N_Shelf
cg10067510	2	48844971	FALSE	TRUE	FALSE	FALSE	FALSE	FALSE	FALSE	FALSE	4.46	1.32	0.0458659	9.40061e-05	0.048619	4.88	1.74	0.0381954	6.08699e-05	0.0031549	1stExon;Body;5'UTR;5'UTR;1stExon	NA	Island	GTF2A1L STON1-GTF2A1L
cg26162813	2	48844984	FALSE	TRUE	FALSE	FALSE	FALSE	FALSE	FALSE	FALSE	4.86	1.72	0.0295074	4.66307e-05	0.0362029	4.1	0.96	0.0185913	0.078391	0.285328	1stExon;Body;5'UTR;5'UTR;1stExon	NA	Island	GTF2A1L STON1-GTF2A1L
cg08486180	2	56461845	FALSE	FALSE	FALSE	FALSE	FALSE	FALSE	FALSE	FALSE	5.4	2.26	0.00674788	1.08687e-05	0.0195843	4.52	1.38	0.00360097	0.0216417	0.127853	Body	TRUE		CCDC85A
cg10859133	2	63281317	FALSE	FALSE	FALSE	FALSE	FALSE	FALSE	FALSE	FALSE	0.88	4.02	0.0137429	8.06389e-05	0.0454929	1.5	4.64	0.00544824	0.420351	0.703332	Body	NA	Island	OTX1
cg04873961	2	70418194	FALSE	FALSE	FALSE	FALSE	FALSE	FALSE	FALSE	FALSE	4.48	1.34	0.000620867	3.52112e-05	0.0326123	4.66	1.52	0.000465427	0.813964	0.922012	TSS200	NA	Island	C2orf42
cg24516106	2	72079413	FALSE	FALSE	FALSE	FALSE	FALSE	FALSE	FALSE	FALSE	3.88	0.74	0.0803876	8.22237e-07	0.00520639	3.6	0.46	0.0239145	0.408341	0.690762		NA	Island
cg09467436	2	72079424	FALSE	FALSE	FALSE	FALSE	FALSE	FALSE	FALSE	FALSE	3.92	0.78	0.0576946	4.90898e-07	0.00427624	3.9	0.74	0.0274525	0.290982	0.599059		NA	Island
cg25705148	2	72079498	FALSE	FALSE	FALSE	FALSE	FALSE	FALSE	FALSE	FALSE	3.84	0.7	0.064414	1.44085e-06	0.00698165	3.8	0.66	0.0294282	0.0316114	0.162936		NA	Island
cg01361021	2	72079609	FALSE	FALSE	FALSE	FALSE	FALSE	FALSE	FALSE	FALSE	3.9	0.76	0.0497816	1.4463e-05	0.0217269	3.74	0.6	0.0178786	0.18691	0.461565		NA	Island
cg10146462	2	75937660	FALSE	FALSE	FALSE	FALSE	FALSE	FALSE	FALSE	FALSE	4.34	1.18	0.0115995	7.53728e-05	0.0441734	6.2	3.06	0.00361575	0.17729	0.446422	Body	NA	Island	C2orf3
cg24749656	2	86668528	FALSE	FALSE	FALSE	FALSE	FALSE	FALSE	FALSE	FALSE	4.66	1.52	0.0037877	4.19423e-05	0.0350257	0.96	4.1	0.00183315	0.594088	0.801786	5'UTR;TSS200;1stExon	NA	Island	KDM3A
cg14115218	2	88930178	FALSE	FALSE	FALSE	FALSE	FALSE	FALSE	FALSE	FALSE	5.16	2.02	0.0223673	1.37628e-05	0.0213141	4.28	1.14	0.000867264	0.702568	0.86466		TRUE	S_Shelf
cg06179606	2	96055142	FALSE	FALSE	FALSE	FALSE	FALSE	FALSE	FALSE	FALSE	4.5	1.36	0.00438321	7.16055e-05	0.0435643	0.38	3.52	0.000757853	0.717667	0.872101		NA	Island
cg25800500	2	97505275	FALSE	FALSE	TRUE	TRUE	FALSE	FALSE	FALSE	FALSE	4.12	0.98	0.101899	1.79336e-06	0.00802785	4.02	0.88	0.0461919	0.174135	0.443568	3'UTR	NA	Island	ANKRD23
cg01217204	2	113239325	FALSE	FALSE	FALSE	FALSE	FALSE	FALSE	FALSE	FALSE	0.46	3.6	0.0160919	6.90851e-05	0.0432933	1.76	4.9	0.00799619	0.330707	0.635046	TSS1500	NA	Island	TTL
cg19651219	2	115419729	TRUE	TRUE	FALSE	FALSE	FALSE	FALSE	FALSE	FALSE	4.36	1.22	0.042894	5.18118e-05	0.0378122	4.44	1.3	0.0558213	6.16191e-05	0.0031549	Body	TRUE	Island	DPP10
cg21470541	2	120976896	FALSE	FALSE	FALSE	FALSE	FALSE	TRUE	FALSE	FALSE	6.1	2.96	0.0447593	9.21646e-07	0.00564241	4.76	1.62	0.009211	0.978385	0.992304		NA	N_Shelf
cg11513884	2	121071625	FALSE	FALSE	FALSE	FALSE	FALSE	FALSE	FALSE	FALSE	4.6	1.44	0.0194972	2.53456e-05	0.0285924	1.86	5	0.0112841	0.156954	0.426448		TRUE
cg04752871	2	121412432	FALSE	FALSE	FALSE	FALSE	FALSE	FALSE	FALSE	FALSE	4.44	1.3	0.0450047	2.89108e-05	0.0296372	4.82	1.68	0.01794	0.183281	0.454064		TRUE	S_Shore
cg21790715	2	121776314	FALSE	FALSE	FALSE	FALSE	FALSE	FALSE	FALSE	FALSE	4.5	1.36	0.0626347	7.19961e-07	0.00517098	4.1	0.96	0.0270196	0.113396	0.356523		TRUE
cg05403241	2	121776604	FALSE	FALSE	FALSE	FALSE	FALSE	FALSE	FALSE	FALSE	4.44	1.3	0.0627994	6.18819e-06	0.0153664	3.7	0.56	0.0219253	0.071495	0.266545		TRUE
cg10950615	2	122319794	FALSE	FALSE	FALSE	FALSE	FALSE	FALSE	FALSE	FALSE	5.86	2.72	0.0265231	8.38513e-06	0.0174343	2.58	5.74	0.00560082	0.734551	0.877658	Body;Body;Body	TRUE		CLASP1
cg15781838	2	128422717	FALSE	FALSE	FALSE	FALSE	FALSE	FALSE	FALSE	FALSE	4.68	1.54	0.0055876	9.75842e-06	0.0190448	4.9	1.76	0.000793038	0.710652	0.868175	Body;Body;TSS1500;5'UTR	NA	S_Shore	LIMS2
cg15123104	2	131089926	FALSE	FALSE	FALSE	FALSE	FALSE	FALSE	FALSE	FALSE	4.86	1.72	0.0342389	7.58877e-05	0.0442468	5.72	2.58	0.0144556	0.0311924	0.162936		NA
cg09015973	2	131673771	FALSE	FALSE	FALSE	FALSE	FALSE	FALSE	FALSE	FALSE	4.12	0.98	0.0773382	1.18315e-05	0.0201837	4.28	1.14	0.0264263	0.18878	0.463205	TSS1500;TSS1500	NA	Island	ARHGEF4
cg00401745	2	131673963	FALSE	FALSE	FALSE	FALSE	FALSE	FALSE	FALSE	FALSE	4.24	1.1	0.0417858	4.36987e-05	0.0353026	4.24	1.1	0.039182	0.0198426	0.124911	TSS1500;TSS1500	NA	Island	ARHGEF4
cg00028678	2	131674175	FALSE	FALSE	FALSE	FALSE	FALSE	FALSE	FALSE	FALSE	4.22	1.08	0.0509997	6.44702e-06	0.0154026	4.34	1.2	0.0283073	0.053153	0.219471	TSS200;TSS200	NA	S_Shore	ARHGEF4
cg13602816	2	131674221	FALSE	FALSE	FALSE	FALSE	FALSE	FALSE	FALSE	FALSE	3.74	0.6	0.0363324	2.36493e-05	0.0279447	4.28	1.14	0.012173	0.2372	0.531156	TSS200;TSS200	NA	S_Shore	ARHGEF4
cg07755203	2	150177004	FALSE	TRUE	FALSE	FALSE	FALSE	FALSE	FALSE	FALSE	4.32	1.18	0.0490045	4.90473e-05	0.0367439	4.4	1.26	0.0369144	0.00116034	0.0247539		NA	Island
cg07027706	2	168572728	FALSE	FALSE	TRUE	TRUE	TRUE	FALSE	FALSE	FALSE	4.3	1.16	0.0175264	1.19484e-05	0.0202664	3.96	0.82	0.0311166	3.27128e-06	0.0012831		NA	Island
cg15602054	2	170624685	FALSE	TRUE	FALSE	FALSE	FALSE	FALSE	FALSE	FALSE	4.42	1.28	0.0594697	1.28676e-05	0.0209199	3.88	0.74	0.0205347	0.23636	0.531156		TRUE	Island
cg17598339	2	170624727	TRUE	TRUE	FALSE	FALSE	FALSE	FALSE	FALSE	FALSE	4.42	1.28	0.0741697	3.34708e-05	0.0318309	4.4	1.26	0.0147211	0.433875	0.710285		TRUE	Island
cg04362989	2	170625479	FALSE	TRUE	FALSE	FALSE	FALSE	FALSE	FALSE	FALSE	4.3	1.16	0.0618706	1.22931e-06	0.00677598	4.38	1.24	0.0346628	0.00724734	0.0701481		NA	Island
cg22067795	2	174829788	FALSE	FALSE	FALSE	FALSE	FALSE	FALSE	FALSE	FALSE	1.54	4.68	0.00603133	2.8915e-05	0.0296372	5.86	2.72	0.00173277	0.648015	0.833749	TSS1500;Body	NA	Island	SP3
cg07729527	2	174889845	FALSE	FALSE	FALSE	FALSE	FALSE	FALSE	FALSE	FALSE	1.06	4.2	0.0256706	6.70268e-05	0.0428911	3.38	0.24	0.00234931	0.96921	0.988517		TRUE	N_Shore
cg03913859	2	177399921	FALSE	FALSE	FALSE	FALSE	FALSE	FALSE	FALSE	FALSE	4.28	1.14	0.00545701	8.41065e-05	0.0463285	1.8	4.94	0.00113969	0.543706	0.783645		TRUE
cg14652549	2	181846182	FALSE	FALSE	FALSE	FALSE	FALSE	FALSE	FALSE	FALSE	1.68	4.82	0.00481399	8.41876e-05	0.0463285	5.28	2.14	0.00206047	0.654378	0.83621	5'UTR;5'UTR	NA	S_Shore	UBE2E3
cg20299002	2	197036414	FALSE	FALSE	FALSE	FALSE	FALSE	FALSE	FALSE	FALSE	4.68	1.54	0.00397418	2.85915e-05	0.0296372	0.14	3.28	0.000725638	0.512289	0.763958	TSS200	NA	S_Shore	STK17B
cg00297702	2	203735559	FALSE	FALSE	FALSE	FALSE	FALSE	FALSE	FALSE	FALSE	4.6	1.46	0.0141447	5.86288e-05	0.0408747	5.24	2.1	0.020792	0.16686	0.44016	5'UTR;5'UTR	NA	N_Shore	ICA1L
cg21445204	2	220140750	FALSE	FALSE	FALSE	FALSE	FALSE	FALSE	FALSE	FALSE	5.06	1.92	0.0288996	6.78625e-05	0.0430948	5.5	2.36	0.00121777	0.587327	0.801786		NA	N_Shelf
cg13772414	2	222383060	FALSE	FALSE	FALSE	FALSE	FALSE	FALSE	FALSE	FALSE	0.54	3.68	0.0320401	6.35343e-06	0.0153664	3.72	0.58	0.0032735	0.880909	0.958418	Body	TRUE		EPHA4
cg13742400	2	225639708	FALSE	FALSE	FALSE	FALSE	FALSE	FALSE	FALSE	FALSE	6.22	3.08	0.0364113	2.24159e-05	0.0270242	0.96	4.1	0.00256108	0.900618	0.964678	Body	NA		DOCK10
cg05868531	2	232348602	FALSE	FALSE	FALSE	FALSE	FALSE	FALSE	FALSE	FALSE	4.42	1.28	0.0564876	6.6556e-06	0.0155224	4.64	1.5	0.0243372	0.115988	0.356523		TRUE	Island
cg15371801	2	232348684	FALSE	FALSE	FALSE	FALSE	FALSE	FALSE	FALSE	FALSE	4.42	1.28	0.0481728	3.80675e-05	0.0333678	4.66	1.52	0.0249042	0.0291617	0.15772		TRUE	Island
cg11559198	2	232348794	FALSE	FALSE	FALSE	FALSE	FALSE	FALSE	FALSE	FALSE	4.36	1.22	0.0628782	1.43537e-05	0.0217269	4.62	1.48	0.0334836	0.0363514	0.173403		NA	Island
cg22403782	2	233246136	FALSE	FALSE	FALSE	FALSE	FALSE	FALSE	FALSE	FALSE	4.36	1.22	0.041018	1.57662e-05	0.022382	4.34	1.2	0.0234216	0.121821	0.365615	Body	NA	Island	ALPP
cg12307638	2	233323532	FALSE	FALSE	FALSE	FALSE	FALSE	FALSE	FALSE	FALSE	4.44	1.3	0.0498567	5.41246e-07	0.00441808	3.6	0.46	0.00538558	0.748668	0.883222	Body	NA	Island	ALPI
cg26181818	2	233323935	FALSE	FALSE	FALSE	FALSE	FALSE	FALSE	FALSE	FALSE	3.78	0.62	0.0556149	6.53015e-05	0.0428215	3.74	0.6	0.0157513	0.443092	0.710285	3'UTR	NA	Island	ALPI
cg09042791	2	235904300	FALSE	FALSE	FALSE	FALSE	FALSE	FALSE	FALSE	FALSE	2.68	5.82	0.0120798	7.90175e-06	0.0169778	5.18	2.04	0.00523129	0.266773	0.573899	5'UTR	TRUE		SH3BP4
cg23575858	2	237712268	FALSE	FALSE	FALSE	FALSE	FALSE	FALSE	FALSE	FALSE	3.88	0.74	0.0376828	1.78963e-06	0.00802785	4.26	1.12	0.0249927	0.00448843	0.0555986		NA
cg23650279	2	239072961	FALSE	FALSE	TRUE	TRUE	TRUE	FALSE	FALSE	FALSE	4.06	0.92	0.0489854	2.11278e-06	0.00890124	3.66	0.52	0.0134424	0.138651	0.393601		NA	Island
cg03847190	2	240326945	FALSE	FALSE	FALSE	FALSE	FALSE	FALSE	FALSE	FALSE	4.74	1.6	0.0126599	7.93972e-05	0.0451508	5.52	2.38	0.000799348	0.811806	0.920926		NA	S_Shelf
cg00898920	2	241504756	FALSE	FALSE	FALSE	FALSE	FALSE	FALSE	FALSE	FALSE	1.68	4.82	0.0218467	1.20317e-05	0.0203198	2.28	5.42	0.00186989	0.643508	0.832061		NA	N_Shore
cg10901633	3	4814459	FALSE	FALSE	FALSE	FALSE	FALSE	FALSE	FALSE	FALSE	2.46	5.62	0.0299884	6.60488e-06	0.0154963	4.7	1.56	0.000924685	0.728596	0.876279	Body;Body;Body	TRUE		ITPR1
cg25789721	3	10370264	FALSE	FALSE	FALSE	FALSE	FALSE	FALSE	FALSE	FALSE	4.96	1.82	0.0543726	4.25745e-05	0.0350538	4.76	1.6	0.0168683	0.163505	0.434463	3'UTR;3'UTR	NA	N_Shore	ATP2B2
cg16468843	3	10370624	FALSE	FALSE	FALSE	FALSE	FALSE	FALSE	FALSE	FALSE	5.16	2.02	0.050978	5.01235e-05	0.037125	4.68	1.54	0.00893221	0.339284	0.635951	Body;Body	NA	Island	ATP2B2
cg19764594	3	10806288	FALSE	TRUE	FALSE	FALSE	FALSE	FALSE	FALSE	FALSE	4.46	1.32	0.0430219	2.03656e-05	0.0258237	2.8	5.94	0.0250082	0.11276	0.356523	TSS1500	NA		LOC285370
cg27230009	3	11241399	FALSE	FALSE	FALSE	FALSE	FALSE	FALSE	FALSE	FALSE	6.18	3.04	0.0308072	3.59278e-05	0.0326123	4.08	0.94	0.00288774	0.740884	0.877658	5'UTR;5'UTR	TRUE		HRH1
cg18662365	3	27678193	FALSE	FALSE	FALSE	FALSE	FALSE	FALSE	FALSE	FALSE	2.34	5.48	0.011956	4.07768e-05	0.0345074	2.52	5.66	0.00179796	0.522333	0.769152		NA	S_Shelf
cg05726118	3	41265374	FALSE	FALSE	FALSE	FALSE	FALSE	FALSE	FALSE	FALSE	0.24	3.38	0.0300494	2.85597e-05	0.0296372	5.38	2.24	0.00627015	0.447548	0.71163	5'UTR;5'UTR;5'UTR	TRUE		CTNNB1
cg26135722	3	42642776	FALSE	FALSE	FALSE	FALSE	FALSE	FALSE	FALSE	FALSE	1.5	4.64	0.0083559	1.36142e-05	0.0213111	2.24	5.38	0.00217981	0.562514	0.7956	Body	NA	S_Shore	NKTR
cg00057231	3	48631958	FALSE	FALSE	FALSE	FALSE	FALSE	FALSE	FALSE	FALSE	3.94	0.8	0.0366189	2.72945e-05	0.0290607	4.48	1.34	0.0242079	0.0383442	0.179563	Body	NA	Island	COL7A1
cg26468693	3	50208690	FALSE	FALSE	FALSE	FALSE	FALSE	FALSE	FALSE	FALSE	1.14	4.28	0.0176574	6.27895e-05	0.0423439	4.72	1.58	0.0033245	0.937219	0.982232	Body	TRUE		SEMA3F
cg18343556	3	50316384	FALSE	FALSE	FALSE	FALSE	FALSE	FALSE	FALSE	FALSE	1.58	4.72	0.016461	6.87672e-05	0.0431843	1.18	4.32	0.00166555	0.932509	0.982232	TSS200	NA	S_Shore	C3orf45
cg06203251	3	53917543	FALSE	FALSE	FALSE	FALSE	FALSE	FALSE	FALSE	FALSE	5.26	2.12	0.0136749	7.21811e-05	0.0435643	5	1.86	0.00194662	0.609731	0.815807	TSS1500	NA	S_Shore	ACTR8
cg15253604	3	62468682	FALSE	FALSE	FALSE	FALSE	FALSE	FALSE	FALSE	FALSE	4.5	1.36	0.0178465	5.57063e-05	0.0393981	5.96	2.82	0.00243167	0.500993	0.754112	Body;Body;Body	NA		CADPS
cg08875947	3	63880859	FALSE	FALSE	FALSE	FALSE	FALSE	FALSE	FALSE	FALSE	2.86	6	0.00907083	8.82626e-05	0.0475985	5.1	1.96	0.000980405	0.804783	0.91431	5'UTR;5'UTR	TRUE		ATXN7
cg01172682	3	65342216	FALSE	FALSE	FALSE	FALSE	FALSE	FALSE	FALSE	FALSE	4.36	1.22	0.0369632	4.43608e-05	0.0356172	4.52	1.38	0.0302541	0.0002607	0.0091008	Body;3'UTR	TRUE	Island	MAGI1
cg14533390	3	65342843	FALSE	FALSE	FALSE	FALSE	FALSE	FALSE	FALSE	FALSE	4.08	0.94	0.0388675	6.12146e-05	0.0416402	4.24	1.1	0.0243997	0.155612	0.425303	Body;Body	TRUE	Island	MAGI1
cg16931822	3	66475150	FALSE	FALSE	FALSE	FALSE	FALSE	FALSE	FALSE	FALSE	4.42	1.28	0.0130891	2.13093e-05	0.0263701	4.38	1.24	0.00103997	0.589458	0.801786	Body	TRUE		LRIG1
cg24148085	3	72704603	FALSE	FALSE	FALSE	FALSE	FALSE	FALSE	FALSE	FALSE	4.56	1.42	0.0431215	2.90688e-06	0.0112768	4.14	1	0.0229228	0.00800717	0.0719894		TRUE	Island
cg17057719	3	72704701	FALSE	FALSE	FALSE	FALSE	FALSE	FALSE	FALSE	FALSE	4.34	1.2	0.0682779	1.20835e-06	0.00676356	4.46	1.32	0.0194871	0.25851	0.560835		TRUE	S_Shore
cg11343938	3	72978007	FALSE	FALSE	FALSE	FALSE	FALSE	FALSE	FALSE	FALSE	4.32	1.18	0.0161622	1.33052e-05	0.0213111	4.16	1.02	0.00654069	0.00600798	0.0640851	Body	NA	Island	GXYLT2
cg00186462	3	100401284	TRUE	TRUE	FALSE	FALSE	FALSE	FALSE	FALSE	FALSE	4.54	1.4	0.0500066	3.26101e-05	0.0315484	4.52	1.38	0.0707461	0.00151175	0.0270092	Body	NA		GPR128
cg06204062	3	116164512	FALSE	FALSE	FALSE	FALSE	FALSE	FALSE	FALSE	FALSE	3.62	0.48	0.00737288	6.40921e-05	0.0427078	2.54	5.68	0.00152754	0.825497	0.930957	TSS200	TRUE		LSAMP
cg06689045	3	120025420	FALSE	FALSE	FALSE	FALSE	FALSE	FALSE	FALSE	FALSE	4.34	1.2	0.0353284	9.08705e-05	0.0479983	3.94	0.8	0.0145031	0.388035	0.674233		NA	Island
cg13641317	3	127255552	FALSE	FALSE	FALSE	FALSE	FALSE	FALSE	FALSE	FALSE	2.14	5.28	0.0193333	8.22067e-05	0.046212	4.98	1.84	0.00517087	0.982738	0.994391		TRUE
cg21448444	3	128765558	FALSE	FALSE	FALSE	FALSE	FALSE	FALSE	FALSE	FALSE	4.74	1.6	0.0448551	4.24829e-05	0.0350538	0.64	3.8	0.00663706	0.308048	0.616061		NA	Island
cg03396594	3	132139298	FALSE	FALSE	FALSE	FALSE	FALSE	FALSE	FALSE	FALSE	0.26	3.4	0.0102342	7.55049e-05	0.0441734	3.78	0.64	0.000517979	0.975364	0.990846	5'UTR	NA	S_Shelf	DNAJC13
cg03290530	3	137361526	FALSE	FALSE	FALSE	FALSE	FALSE	FALSE	FALSE	FALSE	4.76	1.62	0.051162	2.50166e-05	0.0285924	4.8	1.66	0.0451926	0.0497807	0.211224		TRUE
cg18802720	3	140992338	FALSE	FALSE	FALSE	FALSE	FALSE	FALSE	FALSE	FALSE	4.46	1.32	0.0363317	7.35608e-07	0.00517098	5.04	1.9	0.0050547	0.387953	0.674233	Body;Body	TRUE		ACPL2
cg18107000	3	141206903	FALSE	FALSE	FALSE	FALSE	FALSE	FALSE	FALSE	FALSE	4.8	1.66	0.0035046	8.53029e-07	0.00530521	5.88	2.74	0.000946354	0.430426	0.710285	Body	NA	S_Shore	RASA2
cg12987312	3	142666108	FALSE	TRUE	FALSE	FALSE	FALSE	FALSE	FALSE	FALSE	4.14	1	0.0517618	1.37065e-05	0.0213111	4.22	1.08	0.0340459	0.000527745	0.0138713		NA	N_Shore
cg19513207	3	142666476	FALSE	TRUE	FALSE	FALSE	FALSE	FALSE	FALSE	FALSE	4.16	1.02	0.0399191	6.76308e-05	0.0430173	4.26	1.12	0.0337869	6.79255e-06	0.0012831		NA	Island
cg26182497	3	151055545	FALSE	FALSE	FALSE	FALSE	FALSE	FALSE	FALSE	FALSE	2.5	5.64	0.0134602	1.65227e-05	0.0227951	2.46	5.6	0.00176722	0.643817	0.832061	3'UTR;3'UTR;Body	NA		P2RY12 MED12L
cg25620760	3	170202937	FALSE	FALSE	FALSE	FALSE	FALSE	FALSE	FALSE	FALSE	5.04	1.9	0.0531952	1.23253e-05	0.0204629	3.7	0.56	0.0198784	0.0941754	0.320536	Body	TRUE		SLC7A14
cg06507285	3	180587900	FALSE	FALSE	FALSE	FALSE	FALSE	FALSE	FALSE	FALSE	4.38	1.24	0.0203494	3.70374e-05	0.0329813	3.9	0.76	0.0108108	0.0170122	0.11167		TRUE
cg15367212	3	180588198	FALSE	FALSE	FALSE	FALSE	FALSE	FALSE	FALSE	FALSE	4.8	1.66	0.0421074	1.74737e-05	0.0232873	3.82	0.68	0.0160116	0.129864	0.379222		TRUE
cg22356117	3	182881427	FALSE	FALSE	FALSE	FALSE	FALSE	FALSE	FALSE	FALSE	4.28	1.14	0.0333461	4.79719e-05	0.0365682	3.96	0.8	0.0220061	0.100271	0.331932	TSS1500	NA	S_Shore	LAMP3
cg07120369	3	187388281	FALSE	FALSE	FALSE	FALSE	FALSE	FALSE	FALSE	FALSE	4.46	1.32	0.0509117	7.92132e-05	0.0451423	6.04	2.9	0.00143994	0.789045	0.912538	TSS200	TRUE	S_Shore	SST
cg09610644	3	197249274	FALSE	FALSE	FALSE	FALSE	FALSE	FALSE	FALSE	FALSE	0.22	3.36	0.0367328	5.08699e-05	0.0375359	3.8	0.66	0.00283223	0.696806	0.861751	Body;Body;Body	TRUE		BDH1
cg08283595	4	1299466	FALSE	FALSE	FALSE	FALSE	FALSE	FALSE	FALSE	FALSE	5	1.86	0.00711313	5.89546e-05	0.0409561	5	1.86	0.00122249	0.704323	0.86466	Body;Body	NA		MAEA
cg18063486	4	1512966	FALSE	TRUE	FALSE	FALSE	FALSE	FALSE	FALSE	FALSE	4.58	1.44	0.0419423	3.41305e-05	0.0322236	5.6	2.46	0.0100947	0.230665	0.52567		NA	N_Shore
cg25034424	4	1513089	TRUE	TRUE	FALSE	FALSE	FALSE	FALSE	FALSE	FALSE	4.68	1.54	0.0917402	4.69383e-05	0.0362029	5.68	2.54	0.00891807	0.157715	0.426497		NA	N_Shore
cg09366730	4	2341370	FALSE	FALSE	FALSE	FALSE	FALSE	FALSE	FALSE	FALSE	3.84	0.7	0.072559	1.70143e-07	0.00229878	3.08	6.22	0.028253	0.248655	0.545619	Body	NA	Island	ZFYVE28
cg15600051	4	2341440	FALSE	FALSE	FALSE	FALSE	FALSE	FALSE	FALSE	FALSE	3.64	0.5	0.0526092	3.77572e-07	0.00369845	3.66	0.52	0.0154232	0.617544	0.818757	Body	NA	Island	ZFYVE28
cg10426117	4	3691824	FALSE	FALSE	FALSE	FALSE	FALSE	TRUE	FALSE	FALSE	5.06	1.9	0.00859533	9.15095e-05	0.0479983	2.34	5.48	0.00136874	0.755233	0.886879		NA
cg09199014	4	6052533	FALSE	FALSE	FALSE	FALSE	FALSE	FALSE	FALSE	FALSE	4.76	1.62	0.00804081	7.51114e-06	0.0166091	2.06	5.2	0.000476956	0.323503	0.628987	Body	NA		JAKMIP1
cg19531230	4	6072199	FALSE	FALSE	FALSE	FALSE	FALSE	FALSE	FALSE	FALSE	1.58	4.72	0.0370846	6.47096e-05	0.0427265	5.58	2.44	0.0100087	0.825142	0.930957	Body;Body	NA		JAKMIP1
cg03877332	4	6247830	FALSE	FALSE	FALSE	FALSE	FALSE	FALSE	FALSE	FALSE	4.32	1.18	0.0284807	3.60404e-05	0.0326123	4.86	1.72	0.0191935	0.0276073	0.152535		NA	Island
cg11266540	4	8253235	FALSE	FALSE	FALSE	FALSE	FALSE	TRUE	FALSE	FALSE	4.88	1.74	0.0060892	6.61516e-05	0.0428911	4.96	1.82	0.00113352	0.683855	0.849839		NA
cg14611666	4	13429528	FALSE	FALSE	FALSE	FALSE	FALSE	FALSE	FALSE	FALSE	1.78	4.92	0.00583054	8.41276e-05	0.0463285	1.5	4.64	0.00201388	0.238605	0.531156	Body;Body;Body	NA		RAB28
cg10946669	4	20253130	FALSE	FALSE	FALSE	FALSE	FALSE	FALSE	FALSE	FALSE	4.76	1.62	0.00440401	7.59472e-06	0.0166091	4.82	1.68	0.00235779	0.343184	0.636631		NA	N_Shore
cg10766585	4	24801110	FALSE	FALSE	FALSE	FALSE	FALSE	FALSE	FALSE	FALSE	4.3	1.16	0.0485867	5.80793e-07	0.00455126	4.02	0.88	0.0193355	0.0357713	0.172782	5'UTR	NA	Island	SOD3
cg05796128	4	38100918	FALSE	FALSE	FALSE	FALSE	FALSE	FALSE	FALSE	FALSE	5.22	2.08	0.00758095	6.31502e-05	0.0424541	5.04	1.9	0.00214848	0.56445	0.79687	Body	TRUE		TBC1D1
cg12769566	4	47487497	FALSE	FALSE	FALSE	FALSE	FALSE	FALSE	FALSE	FALSE	4.3	1.16	0.0146952	4.75861e-05	0.0363932	3.98	0.84	0.00249261	0.200138	0.480331	1stExon;5'UTR	NA		ATP10D
cg22775860	4	48483244	FALSE	FALSE	FALSE	FALSE	FALSE	FALSE	FALSE	FALSE	1.1	4.24	0.00982974	8.71205e-06	0.0178717	6.24	3.12	0.00399452	0.0660605	0.256496		NA	N_Shelf
cg25316310	4	48988801	FALSE	FALSE	FALSE	FALSE	FALSE	FALSE	FALSE	FALSE	4.02	0.88	0.0388272	2.88961e-06	0.0112768	4.36	1.22	0.00914057	0.199045	0.480331	Body	NA	Island	CWH43
cg13743387	4	54280858	FALSE	FALSE	FALSE	FALSE	FALSE	FALSE	FALSE	FALSE	1.56	4.7	0.00779821	4.73927e-05	0.0363932	0.08	3.22	0.00191093	0.623653	0.821504	Body;Body;Body	NA		FIP1L1
cg26986681	4	58060609	FALSE	FALSE	FALSE	FALSE	FALSE	FALSE	FALSE	FALSE	4.64	1.5	0.106101	3.32395e-06	0.0116283	4.92	1.76	0.0390562	0.119758	0.364976		NA	N_Shore
cg17932096	4	58060773	FALSE	FALSE	FALSE	FALSE	FALSE	FALSE	FALSE	FALSE	4.62	1.48	0.0832857	3.76668e-06	0.012197	4.9	1.76	0.0362464	0.0437719	0.197967		NA	N_Shore
cg04742556	4	58061991	FALSE	FALSE	FALSE	FALSE	FALSE	FALSE	FALSE	FALSE	4.56	1.4	0.0669491	1.80303e-06	0.00802785	5.28	2.14	0.0302209	0.0123521	0.0912155		NA	Island
cg08928646	4	68567174	FALSE	FALSE	FALSE	FALSE	FALSE	FALSE	FALSE	FALSE	4.1	0.96	0.00482441	2.72104e-07	0.00312654	5.86	2.72	0.00206694	0.0350828	0.171757	TSS1500;Body	NA	S_Shore	UBA6 LOC550112
cg17445155	4	76807543	FALSE	FALSE	FALSE	FALSE	FALSE	FALSE	FALSE	FALSE	3.84	0.7	0.0270634	8.38508e-05	0.0463285	4.08	0.94	0.0118644	0.00805619	0.0719894	Body	NA		PPEF2
cg07775417	4	84469563	FALSE	FALSE	FALSE	FALSE	FALSE	FALSE	FALSE	FALSE	2	5.14	0.0152299	2.95107e-05	0.0297546	5.66	2.52	0.00690475	0.539487	0.781747	Body	TRUE		AGPAT9
cg20776829	4	90758797	FALSE	FALSE	FALSE	FALSE	FALSE	FALSE	FALSE	FALSE	4.96	1.82	0.00190038	4.15892e-05	0.0348934	3.14	0	0.000276428	0.567381	0.797941	TSS1500;5'UTR;TSS1500;TSS1500	NA	Island	SNCA
cg19827089	4	144254752	FALSE	FALSE	FALSE	FALSE	FALSE	FALSE	FALSE	FALSE	0	3.14	0.00775537	4.6701e-05	0.0362029	5.2	2.06	0.000762195	0.70065	0.86466		NA	N_Shelf
cg10868445	4	147163613	FALSE	FALSE	FALSE	FALSE	FALSE	FALSE	FALSE	FALSE	4.88	1.72	0.0469121	8.44531e-05	0.0463444	0.14	3.28	0.0117061	0.594217	0.801786		TRUE
cg14987002	4	151496830	FALSE	FALSE	FALSE	FALSE	FALSE	FALSE	FALSE	FALSE	2.14	5.28	0.00789108	8.44216e-05	0.0463444	3.88	0.74	0.00128684	0.433748	0.710285	Body	NA	N_Shelf	LRBA
cg19183248	4	152364959	FALSE	FALSE	FALSE	FALSE	FALSE	FALSE	FALSE	FALSE	6.22	3.08	0.0217961	5.22177e-05	0.0379585	5.08	1.94	0.000672893	0.942436	0.982232	5'UTR	TRUE		FAM160A1
cg05911003	4	187065516	FALSE	FALSE	TRUE	TRUE	TRUE	FALSE	FALSE	FALSE	3.72	0.58	0.0129429	6.34893e-06	0.0153664	4.3	1.16	0.00556304	0.0773545	0.282896	TSS1500	NA	N_Shore	FAM149A
cg06802630	5	322735	FALSE	FALSE	FALSE	FALSE	FALSE	FALSE	FALSE	FALSE	4.24	1.1	0.0580361	4.55022e-05	0.0359771	3.82	0.66	0.00251962	0.92954	0.982232	Body	NA	Island	AHRR
cg12961784	5	322816	FALSE	FALSE	FALSE	FALSE	FALSE	FALSE	FALSE	FALSE	4.02	0.88	0.0339131	3.94793e-05	0.0339968	3.62	0.48	0.00783456	0.218238	0.506641	Body	NA	Island	AHRR
cg22425359	5	2415878	FALSE	FALSE	FALSE	FALSE	FALSE	TRUE	FALSE	FALSE	5.24	2.1	0.0252648	3.11216e-06	0.0113304	3.3	0.16	0.00119612	0.98987	0.99754		NA
cg04188937	5	3101614	FALSE	FALSE	FALSE	FALSE	FALSE	TRUE	FALSE	FALSE	3.84	0.7	0.030738	2.46931e-05	0.0284562	4.28	1.14	0.0101388	0.114086	0.356523		TRUE
cg11496113	5	34627766	FALSE	FALSE	FALSE	FALSE	FALSE	FALSE	FALSE	FALSE	2.06	5.2	0.0224669	6.69324e-05	0.0428911	0.26	3.4	0.012378	0.0696996	0.263691		TRUE
cg22644194	5	36876111	FALSE	FALSE	FALSE	FALSE	FALSE	FALSE	FALSE	FALSE	4.98	1.84	0.00756363	2.70622e-05	0.0290607	5.28	2.12	0.00198421	0.455884	0.717457	TSS1500;TSS1500	NA	Island	NIPBL
cg23516451	5	38845028	FALSE	FALSE	FALSE	FALSE	FALSE	FALSE	FALSE	FALSE	4.24	1.1	0.0514298	7.59949e-11	2.97759e-05	4.18	1.04	0.0210995	0.0133397	0.0962799	TSS1500;TSS1500	NA	N_Shore	OSMR
cg26814089	5	53502584	FALSE	FALSE	FALSE	FALSE	FALSE	FALSE	FALSE	FALSE	5.72	2.58	0.018148	1.53022e-05	0.0220241	2.38	5.52	0.00484839	0.331501	0.635046	Body	TRUE		ARL15
cg13999099	5	55290899	FALSE	FALSE	FALSE	FALSE	FALSE	FALSE	FALSE	FALSE	1.14	4.28	0.0145267	3.28463e-05	0.0316207	2.48	5.62	0.0169001	0.00155157	0.0270819	TSS200;TSS200	NA	Island	IL6ST
cg26688155	5	64778185	FALSE	FALSE	FALSE	FALSE	FALSE	FALSE	FALSE	FALSE	4.78	1.64	0.0046159	4.57274e-05	0.0359771	0.5	3.64	0.000489501	0.929101	0.982232	TSS1500	TRUE		ADAMTS6
cg01839565	5	71221502	FALSE	FALSE	FALSE	FALSE	FALSE	FALSE	FALSE	FALSE	3.06	6.2	0.0293596	4.67219e-05	0.0362029	3.5	0.36	0.00200679	0.77312	0.901534		TRUE
cg15988937	5	72542632	FALSE	FALSE	FALSE	FALSE	FALSE	FALSE	FALSE	FALSE	5.16	2.02	0.0268603	8.71698e-05	0.0473708	5.58	2.44	0.0127895	0.128644	0.379222		TRUE
cg27295642	5	74952444	FALSE	FALSE	FALSE	FALSE	FALSE	FALSE	FALSE	FALSE	3.94	0.8	0.0474195	1.34099e-06	0.00698165	4.22	1.08	0.0171425	0.206271	0.490076		TRUE
cg26601559	5	77837019	FALSE	FALSE	FALSE	FALSE	FALSE	FALSE	FALSE	FALSE	4.64	1.5	0.00843936	1.26718e-05	0.0206874	5.24	2.1	0.00190757	0.64306	0.832061	5'UTR	TRUE		LHFPL2
cg03400060	5	78365801	FALSE	FALSE	FALSE	FALSE	FALSE	FALSE	FALSE	FALSE	3.68	0.54	0.0530044	5.21011e-05	0.0379441	2.96	6.1	0.0226427	0.133487	0.385407	Body;TSS1500	TRUE	S_Shore	BHMT2 DMGDH
cg01902605	5	78366076	FALSE	FALSE	FALSE	FALSE	FALSE	FALSE	FALSE	FALSE	3.8	0.66	0.0510169	6.68323e-05	0.0428911	4.2	1.06	0.00430474	0.58274	0.801786	Body;TSS1500	TRUE	S_Shore	BHMT2 DMGDH
cg15150652	5	82637778	FALSE	FALSE	FALSE	FALSE	FALSE	FALSE	FALSE	FALSE	2.36	5.5	0.010588	7.82856e-05	0.0450339	2.14	5.28	0.00382652	0.0054907	0.0623456	Body;Body;Body	TRUE		XRCC4
cg21902014	5	90076292	FALSE	FALSE	FALSE	FALSE	FALSE	FALSE	FALSE	FALSE	1.68	4.82	0.0145081	4.49137e-05	0.0358528	1.16	4.3	0.00227655	0.169025	0.44016	Body;Body	NA		GPR98
cg16537383	5	96519401	FALSE	FALSE	FALSE	FALSE	FALSE	FALSE	FALSE	FALSE	4.6	1.46	0.00419179	8.2385e-07	0.00520639	3.84	0.7	0.00050133	0.652565	0.835283	TSS1500;TSS1500	NA	N_Shore	RIOK2
cg12450016	5	98112437	FALSE	FALSE	FALSE	FALSE	FALSE	FALSE	FALSE	FALSE	3.74	0.6	0.0214226	1.43233e-05	0.0217269	5.96	2.82	0.003815	0.443293	0.710285	Body	NA	S_Shelf	RGMB
cg09871247	5	98263747	FALSE	FALSE	FALSE	FALSE	FALSE	FALSE	FALSE	FALSE	0.96	4.1	0.00557693	5.03482e-06	0.0138613	6.04	2.9	0.00475459	0.037029	0.175545		NA	Island
cg07368146	5	111497076	FALSE	FALSE	FALSE	FALSE	FALSE	FALSE	FALSE	FALSE	5.2	2.06	0.0021345	4.68712e-05	0.0362029	5.54	2.4	0.00107317	0.43267	0.710285	Body;TSS200	NA	S_Shore	NCRNA00219 SNORA13
cg06647332	5	131281008	TRUE	TRUE	FALSE	FALSE	FALSE	FALSE	FALSE	FALSE	4.52	1.38	0.0237907	1.62851e-05	0.022788	4.32	1.18	0.00266655	0.461457	0.723468		NA	Island
cg05972502	5	132073061	FALSE	FALSE	FALSE	FALSE	FALSE	FALSE	FALSE	FALSE	1.1	4.24	0.0044029	7.06944e-05	0.043493	2.96	6.1	0.00406143	0.14049	0.395225	Body	NA	Island	KIF3A
cg06660015	5	139743303	FALSE	FALSE	FALSE	FALSE	FALSE	FALSE	FALSE	FALSE	3.98	0.84	0.0422599	4.2015e-05	0.0350257	2.68	5.82	0.00938818	0.423441	0.706963	Body	TRUE	S_Shore	SLC4A9
cg00030420	5	140683772	FALSE	FALSE	FALSE	FALSE	FALSE	FALSE	FALSE	FALSE	3.94	0.8	0.0282661	7.21606e-05	0.0435643	4.58	1.44	0.00142304	0.561366	0.795441	TSS200	NA	Island	SLC25A2
cg08414643	5	153873149	FALSE	FALSE	FALSE	FALSE	FALSE	FALSE	FALSE	FALSE	4.46	1.3	0.0535283	3.87688e-05	0.0336811	3.74	0.6	0.0267353	0.0689023	0.263212		NA	Island
cg08988323	5	157255237	FALSE	FALSE	FALSE	FALSE	FALSE	FALSE	FALSE	FALSE	4.4	1.26	0.0151775	8.00743e-07	0.00520639	3.16	0.02	0.0039706	0.38741	0.674233	Body	TRUE		CLINT1
cg10669219	5	173739399	FALSE	FALSE	TRUE	TRUE	FALSE	FALSE	FALSE	FALSE	3.88	0.74	0.0513627	6.69775e-05	0.0428911	4.74	1.6	0.0239552	0.0960283	0.323464		TRUE	Island
cg11518839	5	176216711	FALSE	FALSE	FALSE	FALSE	FALSE	TRUE	FALSE	FALSE	5.06	1.92	0.0405594	1.01699e-05	0.0192748	4.42	1.26	0.0180327	0.00734995	0.0701481		NA
cg08319922	5	178800355	FALSE	FALSE	FALSE	FALSE	FALSE	FALSE	FALSE	FALSE	4.44	1.3	0.0276835	1.70993e-05	0.0231477	4.74	1.6	0.0214835	0.0224358	0.130601		NA	N_Shore
cg00471059	5	179562620	FALSE	FALSE	FALSE	FALSE	FALSE	FALSE	FALSE	FALSE	1.76	4.9	0.0207751	2.45063e-05	0.0284562	1.76	4.9	0.00901478	0.103802	0.340685	Body	NA	N_Shore	RASGEF1C
cg15068079	5	180479586	FALSE	FALSE	FALSE	FALSE	FALSE	FALSE	FALSE	FALSE	4.22	1.06	0.0443531	8.98053e-05	0.0478735	3.1	6.24	0.0161658	0.0692302	0.263212	Body	NA	Island	BTNL9
cg12717963	5	180622179	FALSE	FALSE	FALSE	FALSE	FALSE	FALSE	FALSE	FALSE	3.98	0.84	0.00947383	6.82345e-05	0.0431613	4.16	1.02	0.00227307	0.0970935	0.325624	Body;Body;Body;Body;Body	NA	Island	TRIM7
cg17619020	6	3248098	FALSE	FALSE	FALSE	FALSE	FALSE	FALSE	FALSE	FALSE	3.82	0.68	0.0441662	6.11961e-05	0.0416402	5.14	2	0.0170586	0.0356732	0.172782		TRUE
cg01401534	6	4079342	FALSE	FALSE	FALSE	FALSE	FALSE	FALSE	FALSE	FALSE	4.14	1	0.0726763	1.19563e-08	0.000745234	4.62	1.48	0.0267081	0.00806131	0.0719894	TSS200;5'UTR;1stExon	TRUE	Island	C6orf201 C6orf146
cg10424681	6	4079350	FALSE	FALSE	FALSE	FALSE	FALSE	FALSE	FALSE	FALSE	4.3	1.16	0.0744266	1.59247e-08	0.000745234	4.68	1.54	0.0257789	0.0524695	0.219003	TSS200;5'UTR;1stExon	TRUE	Island	C6orf201 C6orf146
cg00194146	6	13488404	FALSE	FALSE	FALSE	FALSE	FALSE	FALSE	FALSE	FALSE	1.76	4.9	0.0180502	6.57928e-05	0.0428215	5.88	2.74	0.00708157	0.312577	0.616061	TSS1500	NA	Island	GFOD1
cg15796980	6	13860443	FALSE	FALSE	FALSE	FALSE	FALSE	FALSE	FALSE	FALSE	4.28	1.14	0.0441174	1.93797e-06	0.00825351	4.18	1.04	0.0222364	0.00793579	0.0719894		NA
cg02073492	6	14874959	FALSE	FALSE	FALSE	FALSE	FALSE	FALSE	FALSE	FALSE	5.06	1.92	0.00456764	5.78362e-05	0.0405385	5.06	1.92	0.00190611	0.571094	0.79815		TRUE
cg10944833	6	17702460	FALSE	FALSE	FALSE	FALSE	FALSE	FALSE	FALSE	FALSE	0.94	4.08	0.016944	2.57321e-05	0.0285924	5.42	2.26	0.00703372	0.267784	0.574174	Body	NA	N_Shelf	NUP153
cg02061170	6	20398204	FALSE	FALSE	FALSE	FALSE	FALSE	FALSE	FALSE	FALSE	4.88	1.74	0.00755874	8.40983e-06	0.0174343	4.54	1.4	0.00137418	0.99754	0.99754		NA	N_Shelf
cg15147693	6	24362928	FALSE	FALSE	FALSE	FALSE	FALSE	FALSE	FALSE	FALSE	1.8	4.94	0.00997814	2.92206e-05	0.0296607	2.72	5.86	0.00310102	0.520647	0.768956		NA	S_Shelf
cg07138355	6	26550975	FALSE	FALSE	FALSE	FALSE	FALSE	FALSE	FALSE	FALSE	0.66	3.8	0.0130495	3.43952e-05	0.0323955	1.54	4.7	0.00130426	0.896419	0.963853		NA	Island
cg15379240	6	26592423	FALSE	FALSE	FALSE	FALSE	FALSE	FALSE	FALSE	FALSE	5.46	2.32	0.0432003	7.87863e-05	0.045065	2.06	5.2	0.011435	0.522783	0.769152		NA	N_Shelf
cg02246609	6	28584003	FALSE	FALSE	FALSE	FALSE	FALSE	FALSE	FALSE	FALSE	4.54	1.4	0.0353952	2.79754e-05	0.0296248	4.28	1.14	0.0189743	0.0800512	0.287287		NA	Island
cg01309870	6	28584035	FALSE	FALSE	FALSE	FALSE	FALSE	FALSE	FALSE	FALSE	4.64	1.5	0.031568	4.926e-05	0.0367439	4.34	1.2	0.027077	0.0019763	0.0316208		NA	Island
cg04626491	6	28584053	FALSE	FALSE	FALSE	FALSE	FALSE	FALSE	FALSE	FALSE	4.64	1.5	0.043533	1.95702e-07	0.00247351	4.38	1.24	0.0322411	7.10809e-05	0.00341188		NA	Island
cg09470274	6	28584057	FALSE	FALSE	FALSE	FALSE	FALSE	FALSE	FALSE	FALSE	4.86	1.72	0.0294521	1.00287e-05	0.0192748	4.34	1.18	0.0233284	0.00365784	0.0475532		NA	Island
cg15967709	6	28584081	FALSE	FALSE	FALSE	FALSE	FALSE	FALSE	FALSE	FALSE	4.72	1.58	0.0368723	9.49603e-06	0.018983	4.44	1.3	0.01822	0.0240456	0.136793		NA	Island
cg20839206	6	28584121	FALSE	FALSE	FALSE	FALSE	FALSE	FALSE	FALSE	FALSE	4.36	1.22	0.0535328	2.35189e-07	0.0028797	4.64	1.48	0.0238215	0.0172638	0.112361		NA	Island
cg22121557	6	28584138	FALSE	FALSE	FALSE	FALSE	FALSE	FALSE	FALSE	FALSE	4.44	1.3	0.0430976	1.64012e-05	0.022788	4.64	1.5	0.0389072	0.0146931	0.102584		NA	Island
cg10582827	6	28584464	FALSE	FALSE	FALSE	FALSE	FALSE	FALSE	FALSE	FALSE	4.68	1.54	0.0550893	4.76495e-05	0.0363932	4.12	0.98	0.0302119	0.00583574	0.0640264		NA	S_Shore
cg23110482	6	29796614	FALSE	FALSE	FALSE	FALSE	FALSE	FALSE	FALSE	FALSE	3.5	0.36	0.0364039	1.05402e-05	0.0195843	2.3	5.44	0.00413391	0.947493	0.982232	Body	NA	S_Shore	HLA-G
cg11320544	6	30526487	FALSE	FALSE	FALSE	FALSE	FALSE	FALSE	FALSE	FALSE	5.42	2.26	0.0110877	6.85181e-05	0.0431613	1.64	4.8	0.001844	0.2751	0.574174	Body;Body;TSS1500	NA	S_Shore	PRR3 GNL1
cg24475275	6	30644278	FALSE	FALSE	FALSE	FALSE	FALSE	TRUE	FALSE	FALSE	4.42	1.28	0.00555439	3.34198e-05	0.0318309	4.32	1.18	0.00244709	0.107936	0.35125	3'UTR;3'UTR	NA	S_Shelf	KIAA1949
cg26668675	6	31148463	TRUE	TRUE	FALSE	FALSE	FALSE	FALSE	FALSE	FALSE	4.48	1.34	0.119618	2.83415e-05	0.0296372	5.1	1.96	0.0536825	0.0572161	0.227963		NA	Island
cg03078486	6	31148474	TRUE	TRUE	FALSE	FALSE	FALSE	FALSE	FALSE	FALSE	4.5	1.36	0.0920251	6.8419e-05	0.0431613	5.16	2.02	0.0297113	0.269678	0.574174		NA	Island
cg26818629	6	31148516	TRUE	TRUE	FALSE	FALSE	FALSE	FALSE	FALSE	FALSE	4.5	1.36	0.0696757	8.32141e-05	0.0463285	4.92	1.78	0.019538	0.270111	0.574174		NA	Island
cg09357589	6	31148552	TRUE	TRUE	FALSE	FALSE	FALSE	FALSE	FALSE	FALSE	4.5	1.36	0.083034	5.65433e-05	0.0398462	4.94	1.8	0.0299333	0.187764	0.462188		NA	Island
cg11811828	6	31148666	TRUE	TRUE	FALSE	FALSE	FALSE	FALSE	FALSE	FALSE	4.46	1.32	0.105735	8.92794e-05	0.0476722	4.8	1.66	0.0404093	0.163514	0.434463		NA	S_Shore
cg21370522	6	31543219	FALSE	FALSE	FALSE	FALSE	FALSE	TRUE	FALSE	FALSE	5.9	2.76	0.0449786	6.98868e-05	0.0434055	2.18	5.32	0.0175586	0.382112	0.674233	TSS200	NA		TNF
cg23509869	6	31553441	FALSE	FALSE	FALSE	FALSE	FALSE	FALSE	FALSE	FALSE	0.32	3.46	0.0205489	4.48572e-06	0.0133149	2.86	6	0.00377432	0.854657	0.948521	TSS1500;TSS1500;TSS1500;TSS1500;TSS1500	NA		LST1
cg02717251	6	31617340	FALSE	FALSE	FALSE	FALSE	FALSE	FALSE	FALSE	FALSE	4.78	1.64	0.00700008	1.03645e-06	0.00615299	0.02	3.16	0.000754745	0.622601	0.821504	Body;Body;Body;Body	NA	N_Shelf	BAT3
cg13961400	6	31657548	FALSE	FALSE	FALSE	FALSE	FALSE	FALSE	FALSE	FALSE	2.1	5.26	0.0203351	6.61555e-05	0.0428911	2.72	5.86	0.00172607	0.917329	0.978484	Body	NA		BAT5
cg22098742	6	31936565	FALSE	FALSE	FALSE	FALSE	FALSE	FALSE	FALSE	FALSE	2.02	5.16	0.0220057	4.35371e-05	0.0352714	0.88	4.02	0.00463114	0.555831	0.793911	Body	NA	N_Shelf	SKIV2L
cg02880898	6	32141584	FALSE	FALSE	FALSE	FALSE	FALSE	FALSE	FALSE	FALSE	4.84	1.7	0.00770677	2.28789e-05	0.0274137	5.26	2.12	0.00209559	0.383085	0.674233	5'UTR;5'UTR	NA		AGPAT1
cg19886087	6	32335123	FALSE	FALSE	FALSE	FALSE	FALSE	FALSE	FALSE	FALSE	4.04	0.9	0.0191536	1.17835e-05	0.0201837	4.12	0.98	0.00108618	0.798917	0.912538	Body	NA		C6orf10
cg09566131	6	32947792	FALSE	FALSE	FALSE	FALSE	FALSE	FALSE	FALSE	FALSE	0.8	3.94	0.0192578	6.15545e-05	0.0417457	1.86	5	0.00723891	0.67816	0.848637	Body;Body	NA		BRD2
cg01771651	6	33162444	FALSE	FALSE	FALSE	FALSE	FALSE	FALSE	FALSE	FALSE	1.94	5.08	0.0204384	7.13885e-05	0.0435643	2.9	6.04	0.00715984	0.0164202	0.108713	3'UTR	NA	S_Shore	RXRB
cg20198611	6	33163689	FALSE	FALSE	FALSE	FALSE	FALSE	FALSE	FALSE	FALSE	1.96	5.1	0.0200174	1.44332e-06	0.00698165	1.88	5.02	0.00913417	0.00315815	0.0440993	Body	NA	S_Shelf	RXRB
cg14232091	6	33231870	FALSE	FALSE	FALSE	FALSE	FALSE	FALSE	FALSE	FALSE	5.36	2.22	0.00906996	5.01161e-05	0.037125	5.52	2.38	0.00196016	0.332394	0.635046	Body	NA		VPS52
cg03078690	6	33235504	FALSE	FALSE	FALSE	FALSE	FALSE	FALSE	FALSE	FALSE	1.36	4.5	0.0215895	6.22043e-05	0.0420942	2.72	5.86	0.00152458	0.974948	0.990846	Body	NA	N_Shelf	VPS52
cg24676740	6	33236289	FALSE	FALSE	FALSE	FALSE	FALSE	FALSE	FALSE	FALSE	4.52	1.38	0.0014352	7.27277e-05	0.0435643	6.06	2.92	0.000582997	0.366709	0.662091	Body	NA	N_Shelf	VPS52
cg23006805	6	33236857	FALSE	FALSE	FALSE	FALSE	FALSE	FALSE	FALSE	FALSE	4.76	1.62	0.00580179	9.81854e-06	0.0190448	3.08	6.22	0.00151668	0.16825	0.44016	Body	NA	N_Shelf	VPS52
cg24950709	6	33237526	FALSE	FALSE	FALSE	FALSE	FALSE	FALSE	FALSE	FALSE	4.08	0.94	0.00803882	5.42114e-06	0.0141605	5.46	2.32	0.00188724	0.3936	0.677768	Body	NA	N_Shore	VPS52
cg13054323	6	33254599	FALSE	FALSE	FALSE	FALSE	FALSE	FALSE	FALSE	FALSE	4.7	1.56	0.00931164	4.92524e-05	0.0367439	6.12	2.98	0.000547675	0.897876	0.963853	Body;Body	NA	N_Shore	WDR46
cg03095087	6	33274335	FALSE	FALSE	FALSE	FALSE	FALSE	FALSE	FALSE	FALSE	1.82	4.96	0.0212358	3.22891e-06	0.0113976	2.3	5.44	0.00702059	0.377824	0.670135	Body;Body;Body	NA		TAPBP
cg18796027	6	33375357	FALSE	FALSE	FALSE	FALSE	FALSE	FALSE	FALSE	FALSE	1	4.14	0.0192198	9.62678e-05	0.049306	1.46	4.6	0.00826091	0.084539	0.299198	Body	NA	N_Shelf	KIFC1
cg01628905	6	33389696	FALSE	FALSE	FALSE	FALSE	FALSE	FALSE	FALSE	FALSE	4.78	1.64	0.0126925	1.34466e-05	0.0213111	5.74	2.6	0.00297371	0.334665	0.635046	Body	NA	N_Shelf	SYNGAP1
cg00106093	6	33391341	FALSE	FALSE	FALSE	FALSE	FALSE	FALSE	FALSE	FALSE	4.84	1.7	0.00512177	1.05492e-05	0.0195843	5.2	2.06	0.000805569	0.961413	0.987996	Body	NA	N_Shelf	SYNGAP1
cg02963689	6	33967519	FALSE	FALSE	FALSE	FALSE	FALSE	TRUE	FALSE	FALSE	5.4	2.26	0.00799385	9.06465e-05	0.0479983	1.34	4.48	0.00176704	0.486313	0.741049		NA
cg26063721	6	34499488	FALSE	TRUE	FALSE	FALSE	FALSE	FALSE	FALSE	FALSE	4.64	1.5	0.0450423	7.29738e-05	0.0435643	5.22	2.08	0.0243312	0.159935	0.430982	Body	NA	Island	PACSIN1
cg07912161	6	36929838	FALSE	TRUE	FALSE	FALSE	FALSE	FALSE	FALSE	FALSE	4.36	1.22	0.0516063	3.68029e-05	0.0328472	4.78	1.62	0.00478229	0.728231	0.876279	Body	NA	Island	PI16
cg23737190	6	36930021	TRUE	TRUE	FALSE	FALSE	FALSE	FALSE	FALSE	FALSE	4.38	1.24	0.0931085	2.06093e-05	0.0259646	6.04	2.9	0.00841256	0.967412	0.987996	Body	NA	Island	PI16
cg24661236	6	36930062	FALSE	TRUE	FALSE	FALSE	FALSE	FALSE	FALSE	FALSE	4.48	1.34	0.104879	8.48675e-05	0.0465067	1.72	4.86	0.007121	0.963559	0.987996	Body	NA	Island	PI16
cg11523799	6	43479817	FALSE	FALSE	FALSE	FALSE	FALSE	FALSE	FALSE	FALSE	1.94	5.08	0.0202798	2.90901e-05	0.0296372	1.2	4.36	0.00400123	0.727874	0.876279	TSS1500;3'UTR	NA	S_Shore	C6orf154 YIPF3
cg14920286	6	48732295	FALSE	FALSE	FALSE	FALSE	FALSE	FALSE	FALSE	FALSE	2.18	5.32	0.0201031	2.71309e-05	0.0290607	2.38	5.52	0.00289254	0.387097	0.674233		TRUE
cg22827864	6	72298424	FALSE	FALSE	FALSE	FALSE	FALSE	FALSE	FALSE	FALSE	4.18	1.04	0.0222896	8.92561e-05	0.0476722	3.96	0.82	0.00882323	0.141297	0.396044		NA	Island
cg16115513	6	72298527	FALSE	FALSE	FALSE	FALSE	FALSE	FALSE	FALSE	FALSE	3.8	0.66	0.0250505	4.71894e-06	0.0135046	4.96	1.82	0.0193116	0.00884036	0.0750686		NA	Island
cg01652244	6	74063982	FALSE	TRUE	FALSE	FALSE	FALSE	FALSE	FALSE	FALSE	4.32	1.18	0.0367263	2.22154e-05	0.0268652	4.26	1.12	0.0740908	0.000300707	0.010041	TSS200	NA	Island	DPPA5
cg15414745	6	74064047	FALSE	TRUE	FALSE	FALSE	FALSE	FALSE	FALSE	FALSE	4.52	1.38	0.0714056	3.93233e-06	0.0125264	4.28	1.14	0.00655589	0.627244	0.823026	TSS200	NA	Island	DPPA5
cg23414861	6	74064064	TRUE	TRUE	FALSE	FALSE	FALSE	FALSE	FALSE	FALSE	4.44	1.3	0.0719055	2.82591e-08	0.000851716	4.36	1.22	0.0239761	0.0829713	0.295009	TSS200	NA	Island	DPPA5
cg02931604	6	74064298	TRUE	TRUE	FALSE	FALSE	FALSE	FALSE	FALSE	FALSE	4.46	1.32	0.0634483	4.08322e-06	0.0127989	4.76	1.62	0.0365529	0.0108321	0.0807674	TSS1500	NA	Island	DPPA5
cg12045875	6	74104594	FALSE	TRUE	FALSE	FALSE	FALSE	FALSE	FALSE	FALSE	4.64	1.5	0.0544639	3.08672e-05	0.0303137	4.58	1.44	0.0152564	0.0789304	0.285937	1stExon;5'UTR	NA	Island	DDX43
cg16143502	6	74104801	FALSE	TRUE	FALSE	FALSE	FALSE	FALSE	FALSE	FALSE	4.44	1.3	0.0530449	7.86168e-05	0.0450339	4.1	0.96	0.0109157	0.477565	0.736485	1stExon	NA	Island	DDX43
cg17870270	6	80247259	FALSE	FALSE	FALSE	FALSE	FALSE	FALSE	FALSE	FALSE	4.64	1.5	0.00239811	3.19566e-05	0.0311152	5.1	1.96	0.000816443	0.877115	0.958214	TSS200;TSS200	NA	Island	LCA5
cg12024822	6	90597394	FALSE	FALSE	FALSE	FALSE	FALSE	FALSE	FALSE	FALSE	4.34	1.2	0.0413085	6.67796e-05	0.0428911	4.74	1.6	0.0236371	0.00552018	0.0623456		NA	Island
cg07699307	6	101111561	FALSE	FALSE	FALSE	FALSE	FALSE	FALSE	FALSE	FALSE	1.44	4.58	0.0136827	6.41831e-06	0.0154026	5.88	2.74	0.00417311	0.335941	0.635046	Body	TRUE		ASCC3
cg27451362	6	101846650	FALSE	FALSE	FALSE	FALSE	FALSE	FALSE	FALSE	FALSE	4.3	1.16	0.0184658	7.62604e-06	0.0166091	3.34	0.2	0.00772091	0.291729	0.599059	TSS1500;TSS1500;TSS1500	NA	N_Shore	GRIK2
cg07970325	6	106497542	FALSE	FALSE	FALSE	FALSE	FALSE	FALSE	FALSE	FALSE	0.8	3.94	0.0236292	7.71807e-06	0.0167074	1.8	4.94	0.00106795	0.858056	0.950243		TRUE
cg10890829	6	119450707	FALSE	FALSE	FALSE	FALSE	FALSE	FALSE	FALSE	FALSE	3.96	0.82	0.00518133	8.71584e-05	0.0473708	2.44	5.58	0.00226812	0.674728	0.848637	5'UTR	TRUE		FAM184A
cg25608547	6	129251071	FALSE	FALSE	TRUE	TRUE	TRUE	FALSE	FALSE	FALSE	4.38	1.24	0.0453231	1.24607e-07	0.00195292	4.1	0.96	0.0136908	0.161044	0.432455	Body;Body	NA	N_Shore	LAMA2
cg11938738	6	134999799	FALSE	FALSE	FALSE	FALSE	FALSE	FALSE	FALSE	FALSE	2.84	5.98	0.0087146	8.75776e-05	0.0474608	5.6	2.46	0.00301701	0.461588	0.723468		TRUE
cg07720926	6	138882836	FALSE	FALSE	FALSE	FALSE	FALSE	FALSE	FALSE	FALSE	4.78	1.64	0.00916562	6.31697e-05	0.0424541	4.26	1.12	0.00463158	0.175579	0.443568	Body	TRUE		NHSL1
cg23280720	6	139483193	FALSE	FALSE	FALSE	FALSE	FALSE	FALSE	FALSE	FALSE	6.24	3.1	0.0237552	1.15808e-05	0.0201667	5	1.86	0.00675639	0.22699	0.521941	Body	TRUE		HECA
cg25991026	6	143542226	FALSE	FALSE	FALSE	FALSE	FALSE	FALSE	FALSE	FALSE	5.16	2.02	0.0126247	3.14709e-07	0.00342142	4.54	1.4	0.00364271	0.480103	0.737438	Body	TRUE		AIG1
cg00004963	6	147124996	FALSE	FALSE	FALSE	FALSE	FALSE	FALSE	FALSE	FALSE	4.56	1.42	0.0251704	9.43219e-05	0.0486912	4.22	1.06	0.0266831	0.00925088	0.0750686	TSS200;Body	NA		LOC729176 C6orf103
cg07875215	6	157912969	FALSE	FALSE	FALSE	FALSE	FALSE	FALSE	FALSE	FALSE	0.82	3.96	0.0290616	4.26083e-05	0.0350538	4.18	1.04	0.0020128	0.986307	0.995559	Body;Body	NA		ZDHHC14
cg08929197	6	158068523	FALSE	FALSE	FALSE	FALSE	FALSE	FALSE	FALSE	FALSE	6.18	3.04	0.0312563	6.66924e-05	0.0428911	3.7	0.56	0.0106645	0.133346	0.385407	Body;Body	NA		ZDHHC14
cg07054247	6	159206657	FALSE	FALSE	FALSE	FALSE	FALSE	FALSE	FALSE	FALSE	4.74	1.6	0.00645753	9.78477e-05	0.0499194	3.12	6.24	0.000961734	0.538741	0.781747	Body;Body	TRUE		EZR
cg02042585	6	160783785	FALSE	FALSE	FALSE	FALSE	FALSE	FALSE	FALSE	FALSE	4.08	0.94	0.0627896	9.21685e-05	0.0481505	3.54	0.4	0.0329032	0.0571165	0.227963	Body	NA	Island	SLC22A3
cg09428340	6	163570371	FALSE	FALSE	FALSE	FALSE	FALSE	FALSE	FALSE	FALSE	4.38	1.24	0.107404	3.57209e-05	0.0326123	3.44	0.3	0.0236545	0.111995	0.356523	Body;Body;Body	NA	Island	PACRG
cg00056541	6	164288623	FALSE	FALSE	FALSE	FALSE	FALSE	FALSE	FALSE	FALSE	4.72	1.58	0.0636513	2.03551e-05	0.0258237	4.08	0.94	0.0132833	0.40982	0.69174		TRUE
cg19001113	6	166071572	FALSE	FALSE	FALSE	FALSE	FALSE	FALSE	FALSE	FALSE	5.16	2.02	0.00754859	5.02911e-05	0.0371788	0.44	3.58	0.0018121	0.358872	0.653113	Body;5'UTR	NA	N_Shelf	PDE10A
cg23192346	6	168197699	FALSE	FALSE	FALSE	FALSE	FALSE	FALSE	FALSE	FALSE	3.62	0.48	0.033674	2.57266e-05	0.0285924	4.38	1.24	0.0399601	5.52415e-05	0.0031549	TSS200	NA	Island	C6orf123
cg14670303	6	169654035	FALSE	FALSE	FALSE	FALSE	FALSE	TRUE	FALSE	FALSE	4.86	1.72	0.00714793	4.18581e-05	0.0350257	5.32	2.18	0.00247625	0.472572	0.733202	5'UTR	TRUE		THBS2
cg07598357	6	170595195	FALSE	FALSE	FALSE	FALSE	FALSE	FALSE	FALSE	FALSE	4.9	1.76	0.0117857	8.06953e-05	0.0454929	6.16	3.02	0.00150376	0.634507	0.82784	Body	NA	N_Shelf	DLL1
cg27495951	6	170608479	FALSE	FALSE	FALSE	FALSE	FALSE	FALSE	FALSE	FALSE	5.22	2.08	0.0286042	6.83056e-05	0.0431613	6.06	2.92	0.0162307	0.113304	0.356523		NA	S_Shelf
cg24710073	6	170864351	FALSE	FALSE	FALSE	FALSE	FALSE	FALSE	FALSE	FALSE	1.68	4.82	0.0339226	6.59869e-06	0.0154963	0.46	3.6	0.00932189	0.312843	0.616061	5'UTR	NA	S_Shore	TBP
cg27061377	7	161926	FALSE	FALSE	FALSE	FALSE	FALSE	TRUE	FALSE	FALSE	4.58	1.42	0.00343192	5.1214e-05	0.037648	2.4	5.54	0.00186024	0.452623	0.715743		NA	S_Shore
cg12057156	7	162052	FALSE	FALSE	FALSE	FALSE	FALSE	TRUE	FALSE	FALSE	4.86	1.72	0.0117057	4.75636e-05	0.0363932	2.34	5.48	0.00117691	0.64973	0.833749		NA	S_Shelf
cg00612202	7	926974	FALSE	FALSE	FALSE	FALSE	FALSE	FALSE	FALSE	FALSE	4.4	1.26	0.0157956	7.97139e-06	0.0169778	5.22	2.06	0.00696225	0.0959761	0.323464	Body	NA	N_Shelf	C7orf20
cg04486919	7	2117171	FALSE	FALSE	FALSE	FALSE	FALSE	FALSE	FALSE	FALSE	1.22	4.36	0.0226198	6.68261e-05	0.0428911	3.14	0	0.00988767	0.218357	0.506641	Body;Body;Body	NA	S_Shore	MAD1L1
cg16688681	7	2874522	FALSE	FALSE	FALSE	FALSE	FALSE	FALSE	FALSE	FALSE	6.1	2.96	0.0233359	8.36395e-05	0.0463285	5.1	1.96	0.00876289	0.453314	0.715743	Body	NA		GNA12
cg01587630	7	23053820	FALSE	FALSE	FALSE	FALSE	FALSE	FALSE	FALSE	FALSE	4.7	1.56	0.00923574	4.73652e-07	0.00427624	6.24	3.1	0.00264587	0.556151	0.793911	TSS200	NA	Island	FAM126A
cg13002945	7	23053827	FALSE	FALSE	FALSE	FALSE	FALSE	FALSE	FALSE	FALSE	4.88	1.74	0.00693035	5.11826e-08	0.00143243	3.02	6.16	0.000448003	0.798873	0.912538	TSS200	NA	Island	FAM126A
cg24757553	7	27127501	FALSE	FALSE	FALSE	FALSE	FALSE	FALSE	FALSE	FALSE	4.54	1.38	0.0438912	1.33644e-05	0.0213111	5.02	1.88	0.0300553	0.000541848	0.0138713		NA	Island
cg08164294	7	27154387	FALSE	FALSE	TRUE	TRUE	TRUE	FALSE	FALSE	FALSE	5.5	2.36	0.0185563	1.51804e-05	0.0220241	5.38	2.24	0.00203157	0.586413	0.801786	5'UTR;TSS1500;5'UTR	NA	N_Shore	HOXA3
cg15181598	7	38350921	FALSE	FALSE	FALSE	FALSE	FALSE	FALSE	FALSE	FALSE	4.42	1.28	0.0525665	9.78237e-06	0.0190448	4.5	1.34	0.0578032	0.0106793	0.0807674		TRUE	Island
cg06132400	7	38350938	FALSE	FALSE	FALSE	FALSE	FALSE	FALSE	FALSE	FALSE	4.34	1.2	0.0838854	1.42817e-06	0.00698165	4.6	1.46	0.0499189	0.0189531	0.120297		TRUE	Island
cg25335841	7	38351094	FALSE	FALSE	FALSE	FALSE	FALSE	FALSE	FALSE	FALSE	4.32	1.18	0.0682803	4.3119e-05	0.0351263	4.54	1.4	0.0637029	0.0362263	0.173403		TRUE	Island
cg00739278	7	38351226	FALSE	FALSE	FALSE	FALSE	FALSE	FALSE	FALSE	FALSE	4.42	1.28	0.0442998	7.46505e-06	0.0166091	4.76	1.62	0.0347059	0.0351117	0.171757		NA	Island
cg04391064	7	43797839	FALSE	FALSE	FALSE	FALSE	FALSE	FALSE	FALSE	FALSE	1.12	4.26	0.0156364	8.93061e-05	0.0476722	3.66	0.52	0.00350835	0.539089	0.781747	TSS1500	NA	Island	BLVRA
cg26314566	7	44153406	FALSE	FALSE	FALSE	FALSE	FALSE	FALSE	FALSE	FALSE	5.2	2.06	0.00203731	2.72104e-05	0.0290607	5.5	2.36	0.000474112	0.289577	0.597837	Body	NA	Island	AEBP1
cg02652018	7	45188275	FALSE	FALSE	FALSE	FALSE	FALSE	FALSE	FALSE	FALSE	4.12	0.98	0.0106423	3.19795e-06	0.0113976	4.6	1.46	0.00673058	0.569272	0.797941		NA
cg05425699	7	47580148	FALSE	FALSE	FALSE	FALSE	FALSE	TRUE	FALSE	FALSE	5.74	2.6	0.125592	1.10132e-05	0.0197037	5.1	1.96	0.0326426	0.941405	0.982232	TSS1500	NA	S_Shelf	TNS3
cg00245878	7	64450875	FALSE	FALSE	FALSE	FALSE	FALSE	FALSE	FALSE	FALSE	5	1.86	0.00645818	5.44017e-05	0.0388258	4.7	1.56	0.00402131	0.00692362	0.0690564	1stExon;5'UTR	NA		ZNF117
cg25542733	7	73256925	FALSE	FALSE	FALSE	FALSE	FALSE	FALSE	FALSE	FALSE	1.5	4.64	0.00889983	5.79959e-05	0.0405778	1.16	4.3	0.000996294	0.250178	0.547398	TSS200	NA	Island	WBSCR27
cg03080692	7	83823911	FALSE	FALSE	FALSE	FALSE	FALSE	FALSE	FALSE	FALSE	4.22	1.08	0.00537494	3.45007e-06	0.0118069	5	1.86	0.00100058	0.142862	0.398229	5'UTR;1stExon	NA		SEMA3A
cg00866206	7	99474543	FALSE	FALSE	FALSE	FALSE	FALSE	FALSE	FALSE	FALSE	2.9	6.04	0.0133401	1.53455e-05	0.0220241	5.6	2.46	0.00396301	0.149966	0.414278	1stExon	NA		OR2AE1
cg17868694	7	100841533	FALSE	FALSE	FALSE	FALSE	FALSE	FALSE	FALSE	FALSE	4.22	1.08	0.0380261	3.34425e-05	0.0318309	4.44	1.3	0.0488042	0.00506042	0.0588849	Body	NA	N_Shelf	MOGAT3
cg14288925	7	107223076	FALSE	FALSE	FALSE	FALSE	FALSE	FALSE	FALSE	FALSE	2.5	5.64	0.0298596	7.40986e-05	0.0439836	1.08	4.22	0.00915577	0.330835	0.635046	Body;Body;Body	NA	S_Shelf	BCAP29
cg09678349	7	111368512	FALSE	FALSE	TRUE	TRUE	TRUE	FALSE	FALSE	FALSE	4.3	1.14	0.0277669	2.08223e-05	0.0260801	4.48	1.34	0.14456	9.5019e-06	0.0012831	Body	NA	Island	DOCK4
cg01567825	7	111368651	FALSE	FALSE	FALSE	FALSE	FALSE	FALSE	FALSE	FALSE	4.3	1.16	0.0401674	1.05488e-05	0.0195843	4.4	1.26	0.0592998	0.000499878	0.0137109	Body	NA	Island	DOCK4
cg00147849	7	127906889	FALSE	FALSE	FALSE	FALSE	FALSE	TRUE	FALSE	FALSE	2.38	5.52	0.0111998	7.66691e-05	0.0445227	0	3.14	0.00305203	0.512199	0.763958		TRUE	N_Shelf
cg08245096	7	140135299	FALSE	FALSE	FALSE	FALSE	FALSE	FALSE	FALSE	FALSE	4.68	1.54	0.0351373	7.08217e-05	0.043493	4.3	1.16	0.0281024	0.00325776	0.0446778		NA	N_Shore
cg01269670	7	149411377	FALSE	FALSE	FALSE	FALSE	FALSE	FALSE	FALSE	FALSE	4.28	1.12	0.00752078	4.09305e-05	0.0345628	4.72	1.58	0.00633396	0.22028	0.50815	TSS1500	NA	Island	KRBA1
cg04531694	7	150755479	FALSE	FALSE	FALSE	FALSE	FALSE	FALSE	FALSE	FALSE	1.04	4.18	0.0102526	1.36422e-05	0.0213111	4.66	1.52	0.00161679	0.559644	0.794467	TSS1500;TSS1500;TSS1500	NA	N_Shore	CDK5 SLC4A2
ch.7.3333777R	7	156646977	FALSE	FALSE	FALSE	FALSE	FALSE	FALSE	FALSE	FALSE	4.92	1.78	0.00274762	9.07817e-05	0.0479983	4.7	1.56	0.00132703	0.566823	0.797941	NA	NA	NA	NA
cg27576576	7	156786077	FALSE	FALSE	FALSE	FALSE	FALSE	FALSE	FALSE	FALSE	4	0.86	0.0448444	2.15368e-05	0.0263701	4.18	1.04	0.015571	0.0990103	0.330608		NA
cg04771248	7	157072050	FALSE	FALSE	FALSE	FALSE	FALSE	FALSE	FALSE	FALSE	4.12	0.96	0.0233127	1.05494e-05	0.0195843	4.22	1.08	0.00914251	0.138888	0.393601		NA	Island
cg23704936	7	157072164	FALSE	FALSE	FALSE	FALSE	FALSE	FALSE	FALSE	FALSE	4.22	1.08	0.0260378	3.06473e-05	0.0303137	4.3	1.16	0.00442088	0.799659	0.912538		NA	Island
cg10401362	7	157185402	FALSE	FALSE	FALSE	FALSE	FALSE	FALSE	FALSE	FALSE	5.98	2.84	0.0418354	2.79287e-07	0.00312654	3.34	0.2	0.00792734	0.214588	0.50245	Body	NA		DNAJB6
cg23740652	7	157561925	FALSE	FALSE	FALSE	FALSE	FALSE	FALSE	FALSE	FALSE	4.62	1.48	0.00866733	8.27859e-05	0.0463285	2.64	5.78	0.00383588	0.362237	0.657679	Body;Body;Body	NA	S_Shore	PTPRN2
cg22114501	7	158649237	FALSE	FALSE	FALSE	FALSE	FALSE	FALSE	FALSE	FALSE	1.6	4.74	0.00822024	4.91794e-05	0.0367439	1.92	5.06	0.00156424	0.939764	0.982232	TSS200	NA	Island	WDR60
cg15129982	8	974967	FALSE	FALSE	FALSE	FALSE	FALSE	FALSE	FALSE	FALSE	5.22	2.08	0.0279594	8.31174e-05	0.0463285	3	6.14	0.00109298	0.682782	0.849839		NA	N_Shore
cg03454775	8	2012595	FALSE	FALSE	FALSE	FALSE	FALSE	FALSE	FALSE	FALSE	4.52	1.38	0.0761041	1.99912e-05	0.0255975	3.9	0.76	0.00748599	0.558153	0.793964	Body	NA		MYOM2
cg22381154	8	2212328	FALSE	FALSE	FALSE	FALSE	FALSE	FALSE	FALSE	FALSE	4.38	1.24	0.0458171	4.15488e-05	0.0348934	0.52	3.66	0.00365406	0.513422	0.764163		NA
cg07298985	8	22133076	TRUE	TRUE	FALSE	FALSE	FALSE	FALSE	FALSE	FALSE	3.64	0.5	0.0196405	6.15829e-05	0.0417457	5.66	2.52	0.00652208	0.0451266	0.200331	5'UTR;TSS200	NA	Island	PIWIL2
cg26499430	8	29882170	FALSE	FALSE	FALSE	FALSE	FALSE	FALSE	FALSE	FALSE	2.38	5.52	0.0182623	2.64567e-05	0.0288749	0.6	3.74	0.00446372	0.702746	0.86466		NA	N_Shelf
cg14930065	8	37672607	FALSE	FALSE	FALSE	FALSE	FALSE	TRUE	FALSE	FALSE	5.98	2.84	0.03572	2.91217e-05	0.0296372	4.04	0.9	0.00419098	0.553061	0.792446	Body	TRUE		GPR124
cg12859101	8	41464795	FALSE	FALSE	FALSE	FALSE	FALSE	FALSE	FALSE	FALSE	0.76	3.9	0.0175992	4.64489e-05	0.0362029	2.68	5.82	0.00703992	0.124734	0.371301	Body	TRUE		AGPAT6
cg02712294	8	41559393	FALSE	FALSE	FALSE	FALSE	FALSE	FALSE	FALSE	FALSE	0.7	3.84	0.0141153	8.27414e-06	0.0173365	2.12	5.26	0.00480344	0.251759	0.549293	Body;Body;Body;Body;Body	TRUE	Island	ANK1
cg27619646	8	41583018	FALSE	FALSE	FALSE	FALSE	FALSE	FALSE	FALSE	FALSE	3.9	0.74	0.0338307	1.56147e-05	0.0222475	4.8	1.66	0.00781622	0.171465	0.441896	Body;Body;Body;Body;Body	NA	N_Shore	ANK1
cg27650870	8	41583136	FALSE	FALSE	FALSE	FALSE	FALSE	FALSE	FALSE	FALSE	4.08	0.94	0.0400583	1.53392e-07	0.00229878	0.62	3.76	0.00336319	0.788215	0.912538	Body;Body;Body;Body;Body	NA	Island	ANK1
cg19537719	8	41583498	FALSE	FALSE	FALSE	FALSE	FALSE	FALSE	FALSE	FALSE	4.18	1.02	0.0977494	4.42812e-06	0.0132512	3.28	0.14	0.0178037	0.445251	0.710921	Body;Body;Body;Body;Body	NA	Island	ANK1
cg18614735	8	41583523	FALSE	FALSE	FALSE	FALSE	FALSE	FALSE	FALSE	FALSE	4.06	0.92	0.0667715	7.48384e-08	0.00162904	3.82	0.68	0.00463976	0.902019	0.964833	Body;Body;Body;Body;Body	NA	Island	ANK1
cg08415582	8	57030523	FALSE	FALSE	FALSE	FALSE	FALSE	FALSE	FALSE	FALSE	4.28	1.14	0.0592824	9.05217e-05	0.0479983	4.42	1.28	0.0219188	0.270128	0.574174		NA	Island
cg15423872	8	58906736	FALSE	FALSE	FALSE	FALSE	FALSE	FALSE	FALSE	FALSE	4.36	1.2	0.0485269	1.40362e-06	0.00698165	4.2	1.06	0.0164813	0.305514	0.614226	TSS1500	NA	N_Shore	FAM110B
cg19439706	8	72987872	FALSE	FALSE	FALSE	FALSE	FALSE	FALSE	FALSE	FALSE	3.98	0.84	0.00979967	3.55169e-05	0.0326123	3.3	0.16	0.00180302	0.6176	0.818757	TSS200	TRUE	Island	TRPA1
cg02298862	8	77596076	FALSE	FALSE	FALSE	FALSE	FALSE	FALSE	FALSE	FALSE	2.1	5.24	0.0138818	9.77405e-06	0.0190448	1.28	4.42	0.000806169	0.89267	0.963853	5'UTR;TSS1500	NA	S_Shore	ZFHX4 LOC100192378
cg19187110	8	94372725	FALSE	FALSE	FALSE	FALSE	FALSE	FALSE	FALSE	FALSE	5.28	2.14	0.0165572	4.38643e-05	0.0353635	0.54	3.68	0.00265306	0.774756	0.901534		TRUE
cg20134357	8	114389383	FALSE	FALSE	FALSE	FALSE	FALSE	FALSE	FALSE	FALSE	1.2	4.34	0.0268089	4.06304e-05	0.0344629	2.64	5.78	0.00147535	0.634893	0.82784	Body;Body;TSS200	NA		CSMD3
cg20296493	8	124219725	FALSE	FALSE	FALSE	FALSE	FALSE	FALSE	FALSE	FALSE	4.16	1.02	0.0510543	7.32687e-06	0.0164044	4.24	1.1	0.0346919	0.000316256	0.0101081	Body;Body	NA	Island	FAM83A
cg11716073	8	142182166	FALSE	FALSE	FALSE	FALSE	FALSE	FALSE	FALSE	FALSE	4.82	1.68	0.0441187	2.08341e-05	0.0260801	4.7	1.56	0.00468973	0.51189	0.763958	Body	NA	N_Shore	DENND3
cg13514324	8	145755804	TRUE	TRUE	FALSE	FALSE	FALSE	FALSE	FALSE	FALSE	3.6	0.46	0.053519	1.21624e-05	0.0204524	4.52	1.38	0.0340868	0.0328081	0.165677	TSS1500;3'UTR	NA	Island	MGC70857 KIAA1688
cg26259926	8	145755974	TRUE	TRUE	FALSE	FALSE	FALSE	FALSE	FALSE	FALSE	3.74	0.6	0.0577112	9.37833e-06	0.018941	4.6	1.46	0.0511712	0.0162994	0.108713	Body	NA	Island	KIAA1688
cg12494355	9	35688020	FALSE	FALSE	FALSE	FALSE	FALSE	FALSE	FALSE	FALSE	2.5	5.64	0.0146192	6.57646e-05	0.0428215	3.04	6.18	0.0017579	0.836514	0.936505	Body;Body;Body	NA	N_Shore	TPM2
cg20894495	9	72374488	FALSE	FALSE	FALSE	FALSE	FALSE	FALSE	FALSE	FALSE	5	1.84	0.0073437	5.32176e-05	0.0381894	3.56	0.42	0.00278354	0.639919	0.831569	Body	NA	Island	PTAR1
cg19633863	9	98981433	FALSE	TRUE	FALSE	FALSE	FALSE	FALSE	FALSE	FALSE	4.58	1.44	0.0464964	2.59909e-06	0.0104986	4.98	1.84	0.0207653	0.00720689	0.0701481		NA	Island
cg14214257	9	102058671	FALSE	FALSE	FALSE	FALSE	FALSE	FALSE	FALSE	FALSE	4.36	1.22	0.0679747	7.07685e-08	0.00162904	4.22	1.08	0.0183302	0.0468154	0.204058		NA	N_Shore
cg07881032	9	102059051	FALSE	FALSE	FALSE	FALSE	FALSE	FALSE	FALSE	FALSE	4.36	1.2	0.0642017	1.71181e-08	0.000745234	4.06	0.92	0.0339347	0.00371509	0.0475532		NA	Island
cg01737465	9	113430005	FALSE	FALSE	FALSE	FALSE	FALSE	FALSE	FALSE	FALSE	1.6	4.74	0.00661469	1.15104e-05	0.0201337	5.06	1.92	0.00140038	0.876031	0.958214	TSS1500;TSS1500;TSS1500	NA		MUSK
cg14383611	9	129697802	FALSE	FALSE	FALSE	FALSE	FALSE	FALSE	FALSE	FALSE	5.08	1.92	0.00557406	1.02688e-08	0.000745234	4.36	1.22	0.000778583	0.79223	0.912538	5'UTR	TRUE		RALGPS1
cg05261759	9	130498309	FALSE	FALSE	FALSE	FALSE	FALSE	FALSE	FALSE	FALSE	2.24	5.38	0.0291765	5.28336e-05	0.0381233	0.74	3.88	0.00514676	0.695906	0.861751	TSS1500;TSS1500;TSS1500;TSS1500	NA	S_Shore	TOR2A
cg13599613	9	130524902	FALSE	FALSE	FALSE	FALSE	FALSE	TRUE	FALSE	FALSE	4.42	1.28	0.0316762	7.30325e-05	0.0435643	2.14	5.28	0.0166505	0.286504	0.593087	Body;Body;TSS1500;TSS200	TRUE		SH2D3C
cg16112945	9	136285806	FALSE	FALSE	FALSE	FALSE	FALSE	FALSE	FALSE	FALSE	1.8	4.94	0.0229767	1.08649e-05	0.0195843	2	5.14	0.00653496	0.469141	0.731527	Body;TSS1500;TSS1500;TSS1500	NA	S_Shelf	ADAMTS13
cg13906573	9	140399104	FALSE	FALSE	FALSE	FALSE	FALSE	FALSE	FALSE	FALSE	3.14	0	0.00463274	7.05212e-05	0.043493	0.6	3.74	0.00103545	0.354506	0.646699	Body;Body	NA	N_Shelf	PNPLA7
cg03680680	10	667094	FALSE	FALSE	FALSE	FALSE	FALSE	FALSE	FALSE	FALSE	4.84	1.7	0.0354148	1.72827e-05	0.0231904	1.88	5.02	0.00902396	0.0762243	0.280097	Body	NA	N_Shore	DIP2C
cg18303423	10	734268	FALSE	FALSE	FALSE	FALSE	FALSE	FALSE	FALSE	FALSE	5.54	2.38	0.0261498	5.73716e-05	0.0402849	4.34	1.2	0.0037304	0.530959	0.775562	Body	NA	N_Shore	DIP2C
cg00142642	10	13200437	FALSE	FALSE	FALSE	FALSE	FALSE	FALSE	FALSE	FALSE	3.54	0.4	0.0383392	6.09135e-05	0.0416402	4.58	1.44	0.0335203	0.00103535	0.0240955		NA	N_Shelf
cg20675702	10	13200491	FALSE	FALSE	FALSE	FALSE	FALSE	FALSE	FALSE	FALSE	3.34	0.2	0.0723412	3.48459e-06	0.0118069	4.28	1.14	0.0485722	0.0205496	0.125888		NA	N_Shelf
cg05219051	10	18999228	FALSE	FALSE	FALSE	FALSE	FALSE	FALSE	FALSE	FALSE	4.48	1.34	0.0349523	8.13015e-05	0.0457688	3.8	0.66	0.0396425	0.000479762	0.0136466		NA	Island
cg09113440	10	18999313	FALSE	FALSE	FALSE	FALSE	FALSE	FALSE	FALSE	FALSE	4.36	1.22	0.042892	2.26603e-05	0.0272351	3.72	0.58	0.0433698	0.00182847	0.0312059		NA	Island
cg02974659	10	29431837	FALSE	FALSE	FALSE	FALSE	FALSE	FALSE	FALSE	FALSE	4.52	1.38	0.046487	5.15192e-05	0.0377307	4.66	1.52	0.0308505	0.00124434	0.0251489		NA
cg13745632	10	50507003	FALSE	FALSE	FALSE	FALSE	FALSE	FALSE	FALSE	FALSE	2.18	5.32	0.0395584	1.47149e-05	0.0218214	0.74	3.88	0.00989623	0.484094	0.741049	TSS200;TSS200	NA		C10orf71
cg00744172	10	54643889	FALSE	FALSE	FALSE	FALSE	FALSE	FALSE	FALSE	FALSE	4.24	1.1	0.0221964	9.68709e-05	0.0494855	4.48	1.34	0.025691	0.00957907	0.0750686		NA
cg16536855	10	71038317	FALSE	FALSE	FALSE	FALSE	FALSE	TRUE	FALSE	FALSE	2.88	6.02	0.0124916	1.10836e-05	0.0197396	1.42	4.56	0.00309306	0.0571083	0.227963	5'UTR;5'UTR;5'UTR	TRUE		HK1
cg09994017	10	75118319	FALSE	FALSE	FALSE	FALSE	FALSE	FALSE	FALSE	FALSE	0.94	4.08	0.00883341	5.1178e-05	0.037648	4.42	1.28	0.000872763	0.729092	0.876279	5'UTR	NA	Island	TTC18
cg05395156	10	75631701	FALSE	FALSE	FALSE	FALSE	FALSE	FALSE	FALSE	FALSE	1.1	4.24	0.0142136	6.8775e-05	0.0431843	3.18	0.04	0.00399362	0.23285	0.528633	Body;Body;Body;Body;Body	NA	N_Shore	CAMK2G
cg04582294	10	88022744	FALSE	FALSE	FALSE	FALSE	FALSE	FALSE	FALSE	FALSE	4.1	0.96	0.0276105	4.25223e-06	0.0131188	3.58	0.44	0.017042	0.183213	0.454064	Body	NA	Island	GRID1
cg08962038	10	88022859	FALSE	FALSE	FALSE	FALSE	FALSE	FALSE	FALSE	FALSE	4	0.86	0.0296428	9.2675e-06	0.0188142	3.96	0.82	0.0146815	0.190963	0.465586	Body	NA	Island	GRID1
cg18417622	10	88023185	FALSE	FALSE	FALSE	FALSE	FALSE	FALSE	FALSE	FALSE	4.02	0.88	0.0395583	5.61312e-05	0.039627	3.88	0.74	0.0196837	0.121872	0.365615	Body	NA	Island	GRID1
cg19731367	10	95256484	FALSE	FALSE	FALSE	FALSE	FALSE	FALSE	FALSE	FALSE	4.24	1.1	0.00331259	1.45285e-05	0.0217269	2.2	5.36	0.000702585	0.595076	0.801786	1stExon;1stExon;5'UTR;5'UTR	NA	Island	CEP55
cg03098589	10	114574891	FALSE	FALSE	FALSE	FALSE	FALSE	TRUE	FALSE	FALSE	0.06	3.2	0.0194044	7.81714e-05	0.0450339	4.8	1.66	0.00826701	0.253374	0.55125	Body	NA		VTI1A
cg05310185	10	123951483	FALSE	FALSE	FALSE	FALSE	FALSE	FALSE	FALSE	FALSE	4.82	1.68	0.0311411	8.80176e-05	0.0475676	5.42	2.28	0.00593696	0.228162	0.52289	Body;Body;Body;Body	TRUE		TACC2
cg03639152	10	131477613	FALSE	FALSE	FALSE	FALSE	FALSE	FALSE	FALSE	FALSE	4.64	1.5	0.00541742	5.70922e-05	0.0401607	3.6	0.46	0.00127982	0.590506	0.801786	Body	NA		MGMT
cg04642620	10	131650358	FALSE	FALSE	FALSE	FALSE	FALSE	FALSE	FALSE	FALSE	4.52	1.36	0.00475485	7.05525e-05	0.043493	6.18	3.04	0.00165936	0.316975	0.622601	Body	NA		EBF3
cg11314211	10	131666314	FALSE	FALSE	FALSE	FALSE	FALSE	FALSE	FALSE	FALSE	4.78	1.64	0.00617035	5.30605e-05	0.0381465	6.24	3.08	0.000486391	0.774547	0.901534	Body	NA	Island	EBF3
cg11693285	10	131927345	FALSE	FALSE	FALSE	FALSE	FALSE	FALSE	FALSE	FALSE	3.7	0.56	0.0630559	1.71563e-05	0.0231477	3.94	0.78	0.0634949	0.000737373	0.0182678		TRUE	Island
cg02238549	10	131927554	FALSE	FALSE	FALSE	FALSE	FALSE	FALSE	FALSE	FALSE	4.04	0.9	0.0466328	1.30063e-06	0.00688654	3.94	0.8	0.0372754	1.6269e-05	0.0012831		TRUE	S_Shore
cg14435498	10	133251574	FALSE	FALSE	FALSE	FALSE	FALSE	FALSE	FALSE	FALSE	4.12	0.98	0.0489587	3.10497e-06	0.0113304	4.14	1	0.017201	0.131899	0.383708		TRUE
cg13584272	10	133251860	FALSE	FALSE	FALSE	FALSE	FALSE	FALSE	FALSE	FALSE	4.28	1.14	0.0298312	8.75504e-05	0.0474608	4.24	1.1	0.0429745	0.00112231	0.0246267		TRUE
cg09033333	10	133892406	FALSE	FALSE	TRUE	TRUE	FALSE	FALSE	FALSE	FALSE	4.28	1.14	0.0784129	3.58523e-05	0.0326123	4.52	1.38	0.0129696	0.711044	0.868175		NA
cg03897392	10	134803718	FALSE	FALSE	FALSE	FALSE	FALSE	TRUE	FALSE	FALSE	4.5	1.34	0.0357909	7.85208e-05	0.0450339	1.38	4.52	0.00145064	0.830637	0.932645		NA	N_Shore
cg23452957	10	135091431	FALSE	FALSE	FALSE	FALSE	FALSE	FALSE	FALSE	FALSE	2.14	5.28	0.0314284	7.17714e-06	0.0162549	0.82	3.96	0.00879323	0.243062	0.536413	TSS1500;TSS1500;TSS1500	TRUE	S_Shore	ADAM8
cg08506282	11	453143	FALSE	FALSE	FALSE	FALSE	FALSE	FALSE	FALSE	FALSE	4.9	1.76	0.00608944	6.45228e-05	0.0427265	1.16	4.32	0.00240257	0.193987	0.471192	Body	NA	S_Shore	PTDSS2
cg16521773	11	865988	FALSE	FALSE	FALSE	FALSE	FALSE	FALSE	FALSE	FALSE	1.04	4.18	0.0172533	7.62246e-05	0.0443772	5.7	2.56	0.00331316	0.881046	0.958418	Body;Body;Body;Body;Body;Body;Body	NA		TSPAN4
cg13968557	11	977965	FALSE	FALSE	FALSE	FALSE	FALSE	FALSE	FALSE	FALSE	5.86	2.72	0.00688237	9.1373e-05	0.0479983	1.74	4.88	0.000484674	0.997301	0.99754	Body	NA	S_Shore	AP2A2
cg19986254	11	2077522	FALSE	FALSE	FALSE	FALSE	FALSE	FALSE	FALSE	FALSE	4.68	1.54	0.0221832	1.08964e-05	0.0195843	1.62	4.76	0.0073003	0.658804	0.8363		NA
cg17434309	11	2161079	FALSE	FALSE	FALSE	FALSE	FALSE	FALSE	FALSE	FALSE	4.64	1.5	0.00833448	7.12258e-05	0.0435371	2.66	5.8	0.00272037	0.395215	0.679027	Body;TSS1500;Body;5'UTR;TSS1500;TSS1500	NA	Island	INS-IGF2 IGF2AS IGF2
cg01517776	11	2417911	FALSE	FALSE	FALSE	FALSE	FALSE	FALSE	FALSE	FALSE	4.54	1.38	0.0128073	9.26636e-05	0.0482804	0.38	3.52	0.00173281	0.750236	0.883714	Body	NA	Island	CD81
cg02475301	11	3253838	FALSE	FALSE	FALSE	FALSE	FALSE	FALSE	FALSE	FALSE	3.9	0.76	0.0339417	2.30497e-05	0.0275341	3.52	0.38	0.0238883	0.0373984	0.176209	TSS1500	NA	Island	MRGPRE
cg17168830	11	3400651	FALSE	FALSE	FALSE	FALSE	FALSE	FALSE	FALSE	FALSE	4.86	1.72	0.00956378	3.79979e-05	0.0333678	5.14	2	0.00149851	0.720933	0.873307	TSS1500;TSS1500;TSS1500	NA	S_Shore	ZNF195
cg12707024	11	10590939	FALSE	FALSE	FALSE	FALSE	FALSE	FALSE	FALSE	FALSE	5.68	2.54	0.00836916	6.57083e-06	0.0154963	1.62	4.76	0.00101837	0.403677	0.687414	TSS1500	TRUE		LYVE1
cg21171314	11	16628640	FALSE	FALSE	FALSE	FALSE	FALSE	FALSE	FALSE	FALSE	3.62	0.48	0.00377211	4.16346e-06	0.0129468	3.84	0.7	0.00184889	0.367535	0.662091		NA	Island
cg08626560	11	31531252	FALSE	FALSE	FALSE	FALSE	FALSE	FALSE	FALSE	FALSE	4.42	1.26	0.00348997	1.1876e-07	0.00195292	3.18	0.02	0.000716265	0.441877	0.710285	TSS200;TSS200	NA	Island	ELP4 IMMP1L
cg06779856	11	33209645	FALSE	FALSE	FALSE	FALSE	FALSE	FALSE	FALSE	FALSE	0	3.14	0.0265888	2.5607e-05	0.0285924	4.28	1.14	0.00881618	0.320127	0.624003		TRUE
cg08134417	11	33890660	FALSE	FALSE	FALSE	FALSE	FALSE	FALSE	FALSE	FALSE	2.08	5.22	0.00739468	9.34e-05	0.0484379	1.7	4.84	0.00331263	0.207389	0.490076	Body;Body;Body	NA	Island	LMO2
cg19486271	11	47235900	FALSE	FALSE	FALSE	FALSE	FALSE	FALSE	FALSE	FALSE	3.84	0.7	0.0565486	2.7095e-05	0.0290607	4.42	1.26	0.0546947	0.0419082	0.193889	TSS1500	NA	N_Shore	DDB2
cg04848972	11	47236123	FALSE	FALSE	FALSE	FALSE	FALSE	FALSE	FALSE	FALSE	3.96	0.82	0.038616	1.69838e-07	0.00229878	3.74	0.6	0.0258233	0.0207299	0.125888	TSS1500	NA	N_Shore	DDB2
cg22081008	11	47236131	FALSE	FALSE	FALSE	FALSE	FALSE	FALSE	FALSE	FALSE	4.06	0.92	0.0243717	2.70927e-05	0.0290607	3.8	0.66	0.0263517	0.0591996	0.233155	TSS1500	NA	N_Shore	DDB2
cg12528597	11	57232556	FALSE	FALSE	FALSE	FALSE	FALSE	FALSE	FALSE	FALSE	3.76	0.62	0.0250552	1.90008e-05	0.0247335	2.18	5.32	0.0119462	0.115138	0.356523	Body	NA	Island	RTN4RL2
cg23371208	11	57408514	FALSE	FALSE	FALSE	FALSE	FALSE	TRUE	FALSE	FALSE	1.72	4.86	0.0142647	5.41751e-05	0.0387346	4.86	1.72	0.0024374	0.55229	0.792446	TSS200	NA		MIR130A
cg19915762	11	64023086	FALSE	FALSE	FALSE	FALSE	FALSE	FALSE	FALSE	FALSE	1.82	4.96	0.0236335	3.10473e-05	0.0303361	1.64	4.78	0.00921991	0.275125	0.574174	Body	NA	N_Shelf	PLCB3
cg07884764	11	64107517	FALSE	FALSE	FALSE	FALSE	FALSE	FALSE	FALSE	FALSE	0.06	3.2	0.0179928	2.57599e-05	0.0285924	0.72	3.86	0.00555936	0.336541	0.635046	TSS200	NA	N_Shelf	CCDC88B
cg08011645	11	64488701	FALSE	FALSE	FALSE	FALSE	FALSE	FALSE	FALSE	FALSE	5.5	2.36	0.0236046	4.01306e-05	0.0344064	5.42	2.28	0.00286509	0.299068	0.606137	5'UTR;5'UTR	NA	N_Shore	NRXN2
cg18791826	11	66234348	FALSE	FALSE	FALSE	FALSE	FALSE	FALSE	FALSE	FALSE	2.26	5.4	0.000972069	3.90425e-05	0.0337804	1.54	4.68	0.000226695	0.678566	0.848637	1stExon;5'UTR;1stExon;5'UTR	NA	Island	PELI3
cg08615650	11	67049363	FALSE	FALSE	FALSE	FALSE	FALSE	FALSE	FALSE	FALSE	1.34	4.48	0.020106	8.4058e-05	0.0463285	5.24	2.1	0.00259971	0.967386	0.987996	Body	NA	N_Shelf	ADRBK1
cg11027221	11	67770665	FALSE	FALSE	FALSE	FALSE	FALSE	FALSE	FALSE	FALSE	0.18	3.32	0.0288046	1.48701e-05	0.0218214	2.96	6.12	0.00265194	0.477134	0.736485	Body	NA	Island	UNC93B1
cg02340541	11	68451699	FALSE	FALSE	TRUE	TRUE	FALSE	FALSE	FALSE	FALSE	4	0.86	0.0398025	5.92066e-05	0.0410584	3.12	0	0.0198693	0.128255	0.379222	TSS1500	NA	Island	GAL
cg25723217	11	69949751	FALSE	FALSE	FALSE	FALSE	FALSE	TRUE	FALSE	FALSE	4.3	1.16	0.0292165	2.58157e-06	0.0104986	4.76	1.62	0.00715371	0.469587	0.731527	Body;Body	NA		ANO1
cg02453779	11	105948520	FALSE	FALSE	FALSE	FALSE	FALSE	FALSE	FALSE	FALSE	0.34	3.48	0.0133346	3.58341e-05	0.0326123	2.26	5.4	0.00520417	0.295519	0.602012	1stExon;TSS200;TSS200	NA	Island	AASDHPPT KBTBD3
cg27205687	11	106888787	FALSE	FALSE	FALSE	FALSE	FALSE	FALSE	FALSE	FALSE	1.44	4.58	0.0142815	1.60036e-05	0.0225555	1.76	4.9	0.00312869	0.866272	0.954515	5'UTR;1stExon	NA	Island	GUCY1A2
cg12974393	11	107779099	FALSE	FALSE	FALSE	FALSE	FALSE	FALSE	FALSE	FALSE	4.44	1.3	0.103171	3.31933e-07	0.00342253	3.24	0.1	0.0242518	0.575946	0.799198		NA
cg04794299	11	108368512	FALSE	FALSE	FALSE	FALSE	FALSE	FALSE	FALSE	FALSE	4.26	1.12	0.00593407	7.32323e-05	0.0435643	3.28	0.14	0.00103418	0.413589	0.696572	Body	NA	Island	KDELC2
cg03501539	11	114760598	FALSE	FALSE	FALSE	FALSE	FALSE	FALSE	FALSE	FALSE	4.82	1.68	0.00799981	7.32175e-05	0.0435643	4.42	1.28	0.00542879	0.0878663	0.308134		TRUE
cg15505737	11	118505096	FALSE	FALSE	FALSE	FALSE	FALSE	FALSE	FALSE	FALSE	2.48	5.62	0.0174808	1.51835e-05	0.0220241	1.42	4.56	0.00189681	0.960363	0.987996	Body;Body;Body	TRUE	N_Shore	PHLDB1
cg05014721	11	118842387	FALSE	TRUE	FALSE	FALSE	FALSE	FALSE	FALSE	FALSE	4.32	1.18	0.0629158	2.13802e-05	0.0263701	4.26	1.1	0.0356452	0.00187479	0.0313008	TSS200	NA	Island	FOXR1
cg18268562	11	118842392	FALSE	TRUE	FALSE	FALSE	FALSE	FALSE	FALSE	FALSE	4.24	1.1	0.043886	6.93772e-05	0.043354	4.24	1.1	0.0296974	0.00639663	0.0663866	TSS200	NA	Island	FOXR1
cg24766553	11	118842444	FALSE	TRUE	FALSE	FALSE	FALSE	FALSE	FALSE	FALSE	4.34	1.2	0.0329838	1.80661e-05	0.0237535	4.14	1	0.0205313	0.013414	0.0962799	5'UTR;1stExon	NA	Island	FOXR1
cg05940452	11	118842484	TRUE	TRUE	FALSE	FALSE	FALSE	FALSE	FALSE	FALSE	4.16	1.02	0.0662728	1.85627e-06	0.00816513	4	0.86	0.0372114	0.00941833	0.0750686	5'UTR;1stExon	NA	Island	FOXR1
cg23670630	11	118842650	FALSE	TRUE	FALSE	FALSE	FALSE	FALSE	FALSE	FALSE	4.34	1.18	0.0609499	1.78855e-05	0.023675	4.14	1	0.0355238	0.0248903	0.140557	1stExon	NA	Island	FOXR1
cg04452896	11	123940679	FALSE	FALSE	FALSE	FALSE	FALSE	FALSE	FALSE	FALSE	4.5	1.36	0.0150385	7.07722e-05	0.043493	4.38	1.24	0.00744986	0.300493	0.606137		NA
cg13945107	11	123947230	FALSE	FALSE	FALSE	FALSE	FALSE	FALSE	FALSE	FALSE	4.3	1.16	0.0136339	1.06575e-07	0.00190894	1.8	4.94	0.0011683	0.781638	0.908166		NA
cg01803766	11	131561541	FALSE	FALSE	TRUE	TRUE	FALSE	FALSE	FALSE	FALSE	4.2	1.06	0.0330232	9.14959e-05	0.0479983	3.52	0.36	0.0226818	0.0438209	0.197967	Body	NA	Island	NTM
cg04956701	11	131903650	FALSE	FALSE	FALSE	FALSE	FALSE	FALSE	FALSE	FALSE	5.32	2.18	0.0221677	1.01318e-05	0.0192748	3.26	0.12	0.00068348	0.795605	0.912538	Body;Body;Body;Body	TRUE		NTM
cg08765940	11	133789708	FALSE	TRUE	TRUE	TRUE	TRUE	FALSE	FALSE	FALSE	3.7	0.56	0.055288	1.45124e-05	0.0217269	4.26	1.12	0.00407544	0.947701	0.982232	Body	NA	Island	IGSF9B
cg15391452	11	134287719	FALSE	FALSE	FALSE	FALSE	FALSE	FALSE	FALSE	FALSE	4.78	1.64	0.00537098	8.78151e-05	0.0475238	1.06	4.2	0.00188597	0.273353	0.574174		NA
cg11491407	12	1973872	FALSE	FALSE	FALSE	FALSE	FALSE	FALSE	FALSE	FALSE	4.06	0.92	0.0406768	4.03188e-05	0.0344629	3.94	0.8	0.0155504	0.0091693	0.0750686	Body	NA	Island	CACNA2D4
cg27649194	12	1974168	FALSE	FALSE	FALSE	FALSE	FALSE	FALSE	FALSE	FALSE	4.2	1.06	0.0460484	4.35701e-05	0.0352714	3.72	0.58	0.0227348	0.0184789	0.119049	Body	NA	Island	CACNA2D4
cg10635895	12	2339439	FALSE	FALSE	TRUE	TRUE	FALSE	FALSE	FALSE	FALSE	4.2	1.06	0.0964712	8.39812e-09	0.000745234	4.6	1.46	0.0297651	0.0158293	0.108544	Body;Body;Body;Body;Body;Body;Body;Body;Body;Body;Body;Body;Body;Body;Body;Body;Body;Body;Body;Body;Body;Body;Body	NA	Island	CACNA1C
cg23390118	12	2339513	FALSE	FALSE	TRUE	TRUE	FALSE	FALSE	FALSE	FALSE	4.18	1.04	0.0454096	4.94953e-07	0.00427624	4.8	1.66	0.0165726	0.136456	0.391039	Body;Body;Body;Body;Body;Body;Body;Body;Body;Body;Body;Body;Body;Body;Body;Body;Body;Body;Body;Body;Body;Body;Body	NA	Island	CACNA1C
cg09576209	12	2339614	FALSE	FALSE	TRUE	TRUE	FALSE	FALSE	FALSE	FALSE	4.18	1.04	0.0560639	1.56238e-08	0.000745234	4.3	1.16	0.0270732	0.00666329	0.0673343	Body;Body;Body;Body;Body;Body;Body;Body;Body;Body;Body;Body;Body;Body;Body;Body;Body;Body;Body;Body;Body;Body;Body	NA	Island	CACNA1C
cg10668399	12	4380586	FALSE	FALSE	FALSE	FALSE	FALSE	FALSE	FALSE	FALSE	1.48	4.62	0.00392764	9.09421e-05	0.0479983	2.28	5.42	0.000487469	0.542716	0.783645		NA	Island
cg20834681	12	5153947	FALSE	FALSE	FALSE	FALSE	FALSE	FALSE	FALSE	FALSE	3.28	0.14	0.0360336	8.26021e-06	0.0173365	3.78	0.64	0.0152903	0.0065882	0.0673343	1stExon	TRUE	Island	KCNA5
cg11059944	12	10183172	FALSE	FALSE	FALSE	FALSE	FALSE	FALSE	FALSE	FALSE	5.66	2.52	0.0306185	8.35488e-05	0.0463285	2.06	5.2	0.0107487	0.594248	0.801786	TSS200	NA		CLEC9A
cg22488164	12	14716910	FALSE	FALSE	FALSE	FALSE	FALSE	FALSE	FALSE	FALSE	6.04	2.9	0.0290609	4.2675e-05	0.0350538	3.68	0.52	0.0119897	0.0448983	0.200331	Body	NA	N_Shelf	PLBD1
cg19164621	12	19794901	FALSE	FALSE	FALSE	FALSE	FALSE	FALSE	FALSE	FALSE	2.76	5.9	0.0164369	1.33442e-05	0.0213111	5.02	1.88	0.00302226	0.575225	0.799198		TRUE
cg22999327	12	20700997	FALSE	FALSE	FALSE	FALSE	FALSE	FALSE	FALSE	FALSE	2.16	5.3	0.0200262	5.5847e-06	0.0143958	4.86	1.72	0.00275454	0.435939	0.710285	Body	TRUE	N_Shelf	PDE3A
cg13285600	12	22528629	FALSE	FALSE	FALSE	FALSE	FALSE	FALSE	FALSE	FALSE	1.76	4.9	0.00586034	6.00125e-08	0.00156758	0.02	3.16	0.00147311	0.151383	0.415221		NA
cg25198275	12	29650692	FALSE	FALSE	FALSE	FALSE	FALSE	FALSE	FALSE	FALSE	4.68	1.54	0.0146538	4.87217e-05	0.0367439	4.64	1.5	0.00735644	0.406439	0.689062	TSS200	NA		OVCH1
cg03637696	12	30354663	FALSE	FALSE	FALSE	FALSE	FALSE	FALSE	FALSE	FALSE	4.66	1.52	0.031371	7.63026e-06	0.0166091	4.4	1.26	0.0151035	0.0710568	0.266203		NA	S_Shore
cg01043616	12	50475035	FALSE	FALSE	TRUE	TRUE	FALSE	FALSE	FALSE	FALSE	3.82	0.68	0.0592169	2.45959e-05	0.0284562	3.06	6.2	0.018428	0.0917609	0.315357	Body;Body	NA	Island	ACCN2
cg16615454	12	50475167	FALSE	FALSE	TRUE	TRUE	FALSE	FALSE	FALSE	FALSE	3.98	0.84	0.040188	9.58586e-06	0.0190448	3.28	0.14	0.00918752	0.0748171	0.276248	Body;Body	NA	Island	ACCN2
cg27441225	12	54422350	FALSE	FALSE	FALSE	FALSE	FALSE	FALSE	FALSE	FALSE	2	5.14	0.00536499	1.46436e-06	0.00699705	5.12	1.96	0.000757715	0.593237	0.801786	5'UTR;Body;1stExon;5'UTR	NA	N_Shore	HOXC4 HOXC5 HOXC6
cg07805981	12	56075321	FALSE	FALSE	FALSE	FALSE	FALSE	FALSE	FALSE	FALSE	4.46	1.3	0.0316224	7.85546e-05	0.0450339	0.76	3.9	0.00490858	0.246743	0.542977	TSS200	TRUE		METTL7B
cg10654546	12	56617576	FALSE	FALSE	FALSE	FALSE	FALSE	FALSE	FALSE	FALSE	4.14	1	0.0522862	3.92125e-05	0.0338414	5.08	1.94	0.0237788	0.364947	0.661035	TSS1500	NA	N_Shore	OBFC2B
cg09796911	12	69668318	FALSE	FALSE	FALSE	FALSE	FALSE	FALSE	FALSE	FALSE	2.04	5.2	0.00605869	4.87632e-05	0.0367439	2.7	5.84	0.002248	0.993996	0.99754	TSS1500	NA		MIR1279
cg07684809	12	75728212	FALSE	FALSE	FALSE	FALSE	FALSE	FALSE	FALSE	FALSE	5.26	2.12	0.00740175	3.07851e-06	0.0113304	0.8	3.94	0.00145936	0.478807	0.736921	TSS1500	NA		GLIPR1L1
cg03223580	12	76742630	FALSE	FALSE	FALSE	FALSE	FALSE	FALSE	FALSE	FALSE	0.92	4.06	0.0324606	2.78641e-05	0.0295868	5.02	1.88	0.00565919	0.594935	0.801786	TSS1500	NA	S_Shore	BBS10
cg26509746	12	79992490	FALSE	FALSE	FALSE	FALSE	FALSE	FALSE	FALSE	FALSE	1.38	4.52	0.0100434	4.52825e-05	0.0359156	5.18	2.04	0.000928629	0.979383	0.992304	Body	TRUE		PAWR
cg20112159	12	80907159	FALSE	FALSE	FALSE	FALSE	FALSE	FALSE	FALSE	FALSE	4.5	1.36	0.0650683	2.08852e-08	0.000749576	4.52	1.38	0.0385845	0.00148607	0.0270092	Body	NA		PTPRQ
cg04251872	12	93964403	FALSE	FALSE	FALSE	FALSE	FALSE	FALSE	FALSE	FALSE	4.16	1.02	0.0163461	7.18237e-05	0.0435643	2.56	5.7	0.000986619	0.82722	0.931533	5'UTR	NA	Island	SOCS2
cg09636302	12	96389483	FALSE	FALSE	TRUE	TRUE	FALSE	FALSE	FALSE	FALSE	0.04	3.2	0.0683933	4.51128e-07	0.00427624	3.9	0.76	0.00636188	0.624685	0.821504	Body	NA	Island	HAL
cg27246571	12	96389588	FALSE	FALSE	TRUE	TRUE	FALSE	FALSE	FALSE	FALSE	0.08	3.22	0.0582308	2.29571e-08	0.000749576	3.68	0.54	0.00149478	0.832719	0.933618	Body	NA	Island	HAL
cg15968895	12	97300881	FALSE	FALSE	FALSE	FALSE	FALSE	FALSE	FALSE	FALSE	4.48	1.34	0.00977448	6.75475e-05	0.0430173	5.74	2.6	0.000859366	0.869093	0.956252	TSS200;TSS1500;TSS200;TSS200	NA	Island	NEDD1
cg16558319	12	97301661	FALSE	FALSE	FALSE	FALSE	FALSE	FALSE	FALSE	FALSE	4.72	1.58	0.00296559	2.48562e-07	0.00295122	5	1.86	0.000569781	0.615835	0.818757	Body;5'UTR;5'UTR;5'UTR	NA	S_Shore	NEDD1
cg19721065	12	113549986	FALSE	FALSE	FALSE	FALSE	FALSE	FALSE	FALSE	FALSE	3.72	0.58	0.0408622	9.47173e-05	0.0487668	4.06	0.92	0.0383717	0.00014782	0.00597503	Body	NA	Island	RASAL1
cg20249210	12	115172502	FALSE	FALSE	FALSE	FALSE	FALSE	FALSE	FALSE	FALSE	4.66	1.52	0.0495499	4.66963e-05	0.0362029	4.06	0.92	0.015439	0.325287	0.63086		TRUE	N_Shore
cg11258452	12	119594454	TRUE	TRUE	FALSE	FALSE	FALSE	FALSE	FALSE	FALSE	4.3	1.16	0.0523807	1.07157e-05	0.0195843	2.46	5.6	0.021823	0.0307185	0.161588	Body	NA	S_Shelf	SRRM4
cg04255937	12	122269675	FALSE	FALSE	FALSE	FALSE	FALSE	FALSE	FALSE	FALSE	6.2	3.06	0.032527	4.49811e-05	0.0358528	3.46	0.32	0.00606059	0.530762	0.775562	3'UTR	NA	S_Shelf	SETD1B
cg26682900	12	123344689	FALSE	FALSE	FALSE	FALSE	FALSE	FALSE	FALSE	FALSE	1.06	4.2	0.0150073	4.93277e-05	0.0367439	3.7	0.56	0.00115248	0.952888	0.986278	Body	TRUE		HIP1R
cg04398275	12	123834817	FALSE	FALSE	FALSE	FALSE	FALSE	FALSE	FALSE	FALSE	5.28	2.14	0.00502468	8.69839e-05	0.0473708	5.34	2.2	0.00120634	0.373766	0.664473	Body;Body	NA		SBNO1
cg14031846	12	124896614	FALSE	FALSE	FALSE	FALSE	FALSE	FALSE	FALSE	FALSE	5.4	2.26	0.00747145	7.4872e-05	0.0441734	4.46	1.32	0.00059679	0.732751	0.877658	Body;Body	NA		NCOR2
cg01629993	12	127545014	FALSE	FALSE	FALSE	FALSE	FALSE	FALSE	FALSE	FALSE	4.12	0.96	0.0271923	1.79765e-05	0.0237152	3.2	0.06	0.00449098	0.725099	0.876279		NA
cg12412089	12	128866172	FALSE	FALSE	FALSE	FALSE	FALSE	FALSE	FALSE	FALSE	5.14	2	0.0480355	3.03328e-05	0.0300882	4.68	1.52	0.0325717	0.00230656	0.0353138	Body	NA		TMEM132C
cg01016191	12	130707332	FALSE	FALSE	TRUE	TRUE	FALSE	FALSE	FALSE	FALSE	4.88	1.74	0.0813924	2.02604e-05	0.0258237	4.62	1.48	0.034454	0.0294364	0.158092		NA
cg24229701	12	130821962	TRUE	TRUE	FALSE	FALSE	FALSE	FALSE	FALSE	FALSE	4.4	1.26	0.104637	5.48953e-05	0.0390359	4.32	1.18	0.0547962	0.00488963	0.0586756	TSS1500	NA	N_Shore	PIWIL1
cg21385432	12	132512858	FALSE	FALSE	FALSE	FALSE	FALSE	FALSE	FALSE	FALSE	5.5	2.36	0.00476845	6.40699e-05	0.0427078	4.78	1.62	0.00232207	0.143114	0.398229	Body	NA	N_Shore	EP400
cg05626790	12	133187174	FALSE	FALSE	FALSE	FALSE	FALSE	FALSE	FALSE	FALSE	3.9	0.76	0.0413774	9.29848e-05	0.0483193	5.7	2.56	0.0180648	0.447195	0.71163		TRUE	S_Shore
cg23547157	12	133199323	FALSE	FALSE	FALSE	FALSE	FALSE	FALSE	FALSE	FALSE	1.02	4.16	0.0259026	5.41091e-06	0.0141605	5.48	2.34	0.00537569	0.353921	0.646699		TRUE	S_Shelf
cg12156655	12	133385318	FALSE	FALSE	FALSE	FALSE	FALSE	FALSE	FALSE	FALSE	4.96	1.82	0.00672716	5.99837e-05	0.0413776	4.5	1.36	0.00147512	0.370885	0.662417	Body	NA		GOLGA3
cg06873606	13	20625618	FALSE	FALSE	FALSE	FALSE	FALSE	FALSE	FALSE	FALSE	2.14	5.28	0.0126393	7.26437e-05	0.0435643	4.24	1.1	0.00405593	0.169645	0.44016	Body;Body	NA		ZMYM2
cg10372829	13	20751257	FALSE	FALSE	FALSE	FALSE	FALSE	FALSE	FALSE	FALSE	4.2	1.06	0.0513234	1.34387e-05	0.0213111	4.1	0.96	0.0137592	0.309854	0.616061		NA	Island
cg03954144	13	20751679	FALSE	FALSE	FALSE	FALSE	FALSE	FALSE	FALSE	FALSE	4.2	1.06	0.0988213	2.09708e-05	0.0260846	3.78	0.62	0.0320786	0.110928	0.356523		NA	Island
cg09169779	13	20751710	FALSE	FALSE	FALSE	FALSE	FALSE	FALSE	FALSE	FALSE	4.16	1.02	0.0627593	9.44452e-06	0.0189769	3.92	0.78	0.0299551	0.0268448	0.149397		NA	Island
cg14716095	13	20968690	FALSE	FALSE	FALSE	FALSE	FALSE	FALSE	FALSE	FALSE	4.2	1.06	0.0498242	1.53046e-05	0.0220241	4.02	0.88	0.0189924	0.140122	0.395225		NA	N_Shore
cg17549366	13	21141057	FALSE	FALSE	FALSE	FALSE	FALSE	FALSE	FALSE	FALSE	4.9	1.76	0.0068831	4.52274e-05	0.0359156	5.56	2.42	0.00215188	0.0146926	0.102584	TSS200;TSS200	NA	Island	IFT88
cg09955012	13	22477006	FALSE	FALSE	FALSE	FALSE	FALSE	TRUE	FALSE	FALSE	4.52	1.38	0.00435493	1.36591e-05	0.0213111	4.62	1.48	0.00147349	0.87209	0.958176		TRUE
cg14395298	13	23412250	TRUE	TRUE	FALSE	FALSE	FALSE	FALSE	FALSE	FALSE	4.78	1.64	0.121383	1.22605e-05	0.0204629	4.04	0.9	0.0728157	0.0163041	0.108713		NA	Island
cg14089267	13	23412409	TRUE	TRUE	FALSE	FALSE	FALSE	FALSE	FALSE	FALSE	4.62	1.48	0.0902812	6.4544e-05	0.0427265	4.12	0.98	0.0679737	0.0085596	0.074957		NA	Island
cg24702360	13	23412622	FALSE	TRUE	FALSE	FALSE	FALSE	FALSE	FALSE	FALSE	4.58	1.44	0.0642151	3.75948e-05	0.033251	4.34	1.2	0.0456952	0.0229285	0.131411		NA	Island
cg21606928	13	23501122	FALSE	FALSE	FALSE	FALSE	FALSE	FALSE	FALSE	FALSE	3.94	0.8	0.0599231	4.06362e-05	0.0344629	4.54	1.4	0.0267038	0.0569909	0.227963		NA	Island
cg22003348	13	27734206	FALSE	FALSE	FALSE	FALSE	FALSE	FALSE	FALSE	FALSE	1.92	5.06	0.0100979	6.99027e-05	0.0434055	4.42	1.28	0.000205079	0.794646	0.912538	Body	TRUE		USP12
cg26289291	13	30028229	FALSE	FALSE	FALSE	FALSE	FALSE	FALSE	FALSE	FALSE	4.46	1.32	0.0069476	6.0154e-05	0.0414221	3.2	0.06	0.000928501	0.846875	0.943958	Body;Body	TRUE		MTUS2
cg02639958	13	30843564	FALSE	FALSE	FALSE	FALSE	FALSE	FALSE	FALSE	FALSE	2	5.14	0.0305218	7.42015e-05	0.0439836	0.14	3.28	0.0048191	0.898592	0.963853	Body;Body	NA		KATNAL1
cg12286415	13	30948122	FALSE	FALSE	FALSE	FALSE	FALSE	TRUE	FALSE	FALSE	0.74	3.88	0.023532	3.32098e-05	0.0318309	4.8	1.66	0.00567542	0.414529	0.696626	TSS200	NA		LOC100188949
cg19856771	13	42780042	FALSE	FALSE	FALSE	FALSE	FALSE	TRUE	FALSE	FALSE	1.98	5.12	0.0104064	2.81863e-05	0.0296372	5.6	2.46	0.000728926	0.848087	0.943958	Body;Body	TRUE		DGKH
cg18090489	13	45992445	FALSE	FALSE	FALSE	FALSE	FALSE	FALSE	FALSE	FALSE	4.8	1.66	0.00210958	6.34422e-05	0.0425643	1.88	5.02	0.000631327	0.707116	0.866132	1stExon;5'UTR	NA	Island	SLC25A30
cg18753962	13	45995831	FALSE	FALSE	FALSE	FALSE	FALSE	FALSE	FALSE	FALSE	1.96	5.1	0.0163105	1.18481e-05	0.0201837	4.06	0.92	0.00502038	0.385078	0.674233		NA	S_Shelf
cg20634967	13	58204224	FALSE	FALSE	FALSE	FALSE	FALSE	FALSE	FALSE	FALSE	4.34	1.2	0.00425844	1.2473e-05	0.0206207	5.06	1.92	0.000686607	0.426719	0.710066		NA	Island
cg06116009	13	91827542	FALSE	FALSE	FALSE	FALSE	FALSE	FALSE	FALSE	FALSE	3.82	0.68	0.0549538	6.95284e-05	0.0433793	4.08	0.94	0.0239401	0.121793	0.365615		TRUE	Island
cg05313918	13	91827600	FALSE	FALSE	FALSE	FALSE	FALSE	FALSE	FALSE	FALSE	3.9	0.76	0.0813278	2.46533e-05	0.0284562	4.18	1.04	0.0275445	0.528402	0.775562		TRUE	Island
cg11147919	13	102069556	FALSE	FALSE	FALSE	FALSE	FALSE	FALSE	FALSE	FALSE	5.24	2.1	0.0365321	3.48804e-05	0.0325396	4.56	1.42	0.00911723	0.334952	0.635046	TSS1500	NA	S_Shore	NALCN
cg17121140	13	111719003	FALSE	FALSE	FALSE	FALSE	FALSE	FALSE	FALSE	FALSE	4.02	0.88	0.0803238	2.95703e-06	0.0113304	4.2	1.06	0.0410909	0.0125561	0.0918386		NA	N_Shore
cg24721309	13	113384392	FALSE	FALSE	FALSE	FALSE	FALSE	FALSE	FALSE	FALSE	5.1	1.96	0.0384788	3.78303e-05	0.0333678	0.16	3.3	0.00552715	0.124327	0.371301	Body;Body	NA	S_Shore	ATP11A
cg17988535	13	114808856	FALSE	FALSE	TRUE	FALSE	FALSE	FALSE	FALSE	FALSE	5.36	2.22	0.00816872	3.72374e-05	0.0330842	2.9	6.04	0.0250642	0.282529	0.586438	Body	NA	S_Shore	RASA3
cg23519572	13	114808934	FALSE	FALSE	TRUE	FALSE	FALSE	FALSE	FALSE	FALSE	4.82	1.68	0.00632919	5.27045e-06	0.0140479	4.44	1.3	0.0109041	0.441762	0.710285	Body	NA	S_Shore	RASA3
cg01527164	13	114902156	FALSE	FALSE	FALSE	FALSE	FALSE	TRUE	FALSE	FALSE	4.9	1.76	0.00654455	6.2646e-05	0.0423199	4.24	1.1	0.00117958	0.905573	0.967288		NA	S_Shelf
cg09833350	13	115050921	FALSE	FALSE	FALSE	FALSE	FALSE	FALSE	FALSE	FALSE	4.76	1.62	0.0147629	7.76228e-07	0.00520639	5.06	1.92	0.00215588	0.180625	0.451857	Body;Body	NA	S_Shelf	UPF3A
cg13141363	14	24765414	FALSE	FALSE	FALSE	FALSE	FALSE	FALSE	FALSE	FALSE	4.78	1.64	0.00502077	5.66737e-07	0.00453174	5.22	2.08	0.00111212	0.501759	0.754112	Body;Body	NA	N_Shelf	DHRS1
cg20337385	14	39644624	FALSE	FALSE	FALSE	FALSE	FALSE	FALSE	FALSE	FALSE	5.22	2.08	0.00224487	7.56491e-05	0.0441734	3.26	0.12	0.000714125	0.897141	0.963853	Body	NA	Island	PNN
cg26350222	14	55093382	FALSE	FALSE	FALSE	FALSE	FALSE	TRUE	FALSE	FALSE	4.8	1.66	0.0128929	5.51871e-06	0.0143199	4.9	1.76	0.00579988	0.115991	0.356523	Body;Body	TRUE		SAMD4A
cg05890727	14	55764647	FALSE	FALSE	FALSE	FALSE	FALSE	FALSE	FALSE	FALSE	5.6	2.46	0.0633391	1.0813e-05	0.0195843	0.7	3.84	0.00860255	0.636369	0.828358	5'UTR;5'UTR	NA	N_Shore	FBXO34
cg18177275	14	73040574	FALSE	FALSE	FALSE	FALSE	FALSE	FALSE	FALSE	FALSE	5.36	2.22	0.0219554	4.61787e-05	0.0361869	4.5	1.36	0.00493768	0.110523	0.356523		TRUE
cg11858564	14	74182560	FALSE	FALSE	FALSE	FALSE	FALSE	FALSE	FALSE	FALSE	4.82	1.68	0.0101656	3.45757e-05	0.0324356	2.04	5.18	0.00105894	0.957612	0.987996	TSS1500;3'UTR;3'UTR	NA	S_Shore	PNMA1 C14orf43
cg14886850	14	75122289	FALSE	FALSE	FALSE	FALSE	FALSE	FALSE	FALSE	FALSE	0.54	3.68	0.0243537	3.90555e-05	0.0337804	2.86	6	0.00399968	0.658447	0.8363		TRUE
cg19843226	14	76836781	FALSE	FALSE	FALSE	FALSE	FALSE	FALSE	FALSE	FALSE	4.9	1.76	0.0315518	7.44699e-05	0.0440761	5.74	2.6	0.0148614	0.338994	0.635951	TSS1500	NA		ESRRB
cg02400572	14	77736734	FALSE	FALSE	FALSE	FALSE	FALSE	FALSE	FALSE	FALSE	4.48	1.34	0.022464	2.53273e-05	0.0285924	3.38	0.24	0.00651394	0.442304	0.710285	Body	NA	Island	NGB
cg14525832	14	78174638	FALSE	FALSE	FALSE	FALSE	FALSE	FALSE	FALSE	FALSE	4.66	1.52	0.00822245	4.91063e-05	0.0367439	4.46	1.32	0.0059541	0.11652	0.356523	TSS1500;Body	NA	S_Shore	ALKBH1 C14orf156
cg00763510	14	88602681	FALSE	FALSE	FALSE	FALSE	FALSE	FALSE	FALSE	FALSE	4.84	1.7	0.00735682	2.97687e-05	0.0297546	2.86	6	0.000864867	0.858683	0.950243		NA
cg21155767	14	95374525	FALSE	FALSE	FALSE	FALSE	FALSE	FALSE	FALSE	FALSE	4.32	1.18	0.0339291	7.06432e-05	0.043493	4.36	1.22	0.0119597	0.201578	0.48228		NA
cg14282221	14	101121018	FALSE	FALSE	FALSE	FALSE	FALSE	FALSE	FALSE	FALSE	3.62	0.48	0.0336556	7.82115e-05	0.0450339	4.14	1	0.0183108	0.129589	0.379222		NA	Island
cg10046893	14	101456920	FALSE	FALSE	FALSE	FALSE	FALSE	TRUE	FALSE	FALSE	1.92	5.06	0.0184375	8.28906e-05	0.0463285	1.3	4.44	0.00262801	0.802391	0.912943	TSS1500	NA		SNORD114-30
cg19477205	14	101525106	FALSE	FALSE	FALSE	FALSE	FALSE	TRUE	FALSE	FALSE	5.42	2.28	0.024327	3.07858e-05	0.0303137	4.04	0.9	0.00399849	0.295182	0.602012	TSS1500	NA		MIR154
cg16466870	14	101926959	FALSE	FALSE	FALSE	FALSE	FALSE	TRUE	FALSE	FALSE	1.78	4.92	0.0125719	9.13046e-05	0.0479983	4.66	1.52	0.00136193	0.801716	0.912943		NA	S_Shore
cg24127506	14	102050490	FALSE	FALSE	FALSE	FALSE	FALSE	FALSE	FALSE	FALSE	4.44	1.3	0.0509165	3.43988e-07	0.00345588	4.64	1.5	0.0188521	0.0349804	0.171757		NA	N_Shore
cg23012310	14	102050627	FALSE	FALSE	FALSE	FALSE	FALSE	FALSE	FALSE	FALSE	4.54	1.4	0.0684824	1.42494e-06	0.00698165	4.4	1.26	0.0175095	0.034998	0.171757		NA	N_Shore
cg23429749	14	102050815	FALSE	FALSE	FALSE	FALSE	FALSE	FALSE	FALSE	FALSE	4.3	1.16	0.053088	1.45213e-05	0.0217269	4.48	1.34	0.0149035	0.162523	0.434463		NA	Island
cg01067216	14	102051021	FALSE	FALSE	FALSE	FALSE	FALSE	FALSE	FALSE	FALSE	4.48	1.34	0.056661	1.8863e-07	0.00246359	4.58	1.44	0.0198982	0.0943243	0.320536		NA	Island
cg04115584	14	102452687	FALSE	FALSE	FALSE	FALSE	FALSE	FALSE	FALSE	FALSE	4.28	1.14	0.00534155	5.22249e-06	0.0140454	4.14	1	0.00210653	0.0315613	0.162936	Body	NA		DYNC1H1
cg01363714	14	103655773	FALSE	FALSE	FALSE	FALSE	FALSE	FALSE	FALSE	FALSE	3.58	0.44	0.00566729	3.6129e-05	0.0326171	1.5	4.64	0.00211528	0.273114	0.574174		NA	Island
cg21903378	14	104686811	FALSE	FALSE	FALSE	FALSE	FALSE	FALSE	FALSE	FALSE	3.92	0.78	0.0275705	6.09344e-05	0.0416402	5.06	1.92	0.0127032	0.0516933	0.216943		NA	N_Shore
cg10994168	14	105376413	FALSE	FALSE	FALSE	FALSE	FALSE	FALSE	FALSE	FALSE	4.76	1.62	0.0086482	1.7046e-05	0.0231477	4.92	1.78	0.00518898	0.48968	0.744701		NA	S_Shelf
cg01250563	15	24142935	FALSE	FALSE	FALSE	FALSE	FALSE	FALSE	FALSE	TRUE	4.6	1.46	0.0418269	2.48612e-06	0.0102585	4.62	1.48	0.0151334	0.0226547	0.130818		NA
cg20775837	15	25203270	FALSE	FALSE	TRUE	TRUE	TRUE	FALSE	FALSE	FALSE	5.42	2.28	0.020118	9.53383e-05	0.0489957	4.76	1.62	0.00254921	0.347523	0.641581	5'UTR;5'UTR;5'UTR;5'UTR;Body;Body;5'UTR	NA	S_Shelf	SNRPN SNURF
cg01372572	15	25941836	FALSE	FALSE	FALSE	FALSE	FALSE	TRUE	FALSE	FALSE	2.76	5.9	0.0200648	2.88311e-05	0.0296372	2.92	6.06	0.00727209	0.116104	0.356523	Body	TRUE		ATP10A
cg11074933	15	26915414	FALSE	FALSE	FALSE	FALSE	FALSE	FALSE	FALSE	FALSE	4.42	1.28	0.0478032	1.08132e-05	0.0195843	4.64	1.5	0.0269795	0.0047753	0.0582132	Body;Body	NA	Island	GABRB3
cg26726006	15	29210444	FALSE	FALSE	TRUE	TRUE	FALSE	FALSE	FALSE	FALSE	4.14	1	0.0547583	1.89638e-06	0.00816513	3.5	0.36	0.0276791	0.00592088	0.0640456		NA
cg01191259	15	29210460	FALSE	FALSE	TRUE	TRUE	FALSE	FALSE	FALSE	FALSE	4.22	1.08	0.0830491	6.15122e-07	0.00472575	3.86	0.72	0.0438256	0.0213841	0.127853		TRUE
cg16225804	15	29210759	FALSE	FALSE	TRUE	TRUE	FALSE	FALSE	FALSE	FALSE	4.26	1.12	0.0469779	4.38878e-06	0.0132512	4.56	1.42	0.0205139	0.0586315	0.232108		TRUE
cg13176198	15	30336915	FALSE	FALSE	FALSE	FALSE	FALSE	FALSE	FALSE	FALSE	5	1.86	0.0339857	3.67131e-05	0.0328418	3.98	0.84	0.0177967	0.381549	0.674233		NA	Island
cg03330558	15	31516127	FALSE	FALSE	FALSE	FALSE	FALSE	FALSE	FALSE	FALSE	4.4	1.26	0.0437787	3.59184e-05	0.0326123	1.98	5.12	0.0113788	0.569364	0.797941		TRUE
cg16792560	15	31625860	FALSE	FALSE	FALSE	FALSE	FALSE	FALSE	FALSE	FALSE	4.7	1.56	0.0144905	3.43686e-06	0.0118069	5.78	2.64	0.00123484	0.471085	0.732376	Body	TRUE	S_Shelf	KLF13
cg05432213	15	35086985	FALSE	FALSE	FALSE	FALSE	FALSE	FALSE	FALSE	FALSE	4.4	1.26	0.0585572	3.12312e-06	0.0113304	4	0.86	0.0119115	0.102811	0.338881	Body	NA		ACTC1
cg27365324	15	40727743	FALSE	FALSE	FALSE	FALSE	FALSE	FALSE	FALSE	FALSE	4.58	1.42	0.033622	6.08944e-05	0.0416402	4.28	1.14	0.00397758	0.880458	0.958418		NA	N_Shore
cg07774177	15	42387287	FALSE	FALSE	FALSE	FALSE	FALSE	FALSE	FALSE	FALSE	5.38	2.24	0.00640428	1.90669e-05	0.0247373	0.14	3.28	0.00128937	0.39318	0.677768	TSS1500	NA		PLA2G4D
cg20543571	15	45248878	FALSE	FALSE	TRUE	TRUE	FALSE	FALSE	FALSE	FALSE	4.98	1.84	0.0134146	2.93804e-05	0.0297459	1.92	5.06	0.00322772	0.656035	0.8363	TSS200	NA		C15orf43
cg11804248	15	49447897	FALSE	FALSE	FALSE	FALSE	FALSE	FALSE	FALSE	FALSE	5.12	1.98	0.00310119	3.0947e-05	0.0303137	4.28	1.14	0.000528791	0.973673	0.990846	TSS200;TSS200;TSS200	NA	S_Shore	GALK2 COPS2
cg15190747	15	52405133	FALSE	FALSE	FALSE	FALSE	FALSE	FALSE	FALSE	FALSE	2.26	5.4	0.00442338	7.26497e-05	0.0435643	3.78	0.64	0.00238077	2.0988e-05	0.00146534	TSS200	NA	S_Shore	BCL2L10
cg21252175	15	64973903	FALSE	FALSE	FALSE	FALSE	FALSE	FALSE	FALSE	FALSE	2.16	5.3	0.019104	6.09925e-05	0.0416402	5.46	2.32	0.00575688	0.148085	0.410576	3'UTR	NA		ZNF609
cg26476483	15	70974157	FALSE	FALSE	FALSE	FALSE	FALSE	FALSE	FALSE	FALSE	1.82	4.96	0.012195	7.09201e-05	0.043493	1.42	4.56	0.00234426	0.887202	0.962389	Body;Body	TRUE		UACA
cg02079584	15	74528719	FALSE	FALSE	FALSE	FALSE	FALSE	TRUE	FALSE	FALSE	1.74	4.88	0.0272694	5.38897e-07	0.00441808	1.84	4.98	0.00291452	0.680678	0.848637	1stExon;5'UTR	NA		CCDC33
cg10671710	15	75527631	FALSE	FALSE	FALSE	FALSE	FALSE	FALSE	FALSE	FALSE	5.06	1.92	0.0359175	5.29361e-05	0.038127	3.14	0	0.00365222	0.462701	0.723737		NA
cg12363584	15	78110903	FALSE	FALSE	FALSE	FALSE	FALSE	FALSE	FALSE	FALSE	3.6	0.46	0.0271968	4.31219e-05	0.0351263	5.32	2.18	0.00951458	0.310679	0.616061		NA	Island
cg12645284	15	79092878	FALSE	FALSE	FALSE	FALSE	FALSE	FALSE	FALSE	FALSE	4.14	1	0.0620799	3.97741e-05	0.0341756	4.44	1.3	0.0582344	0.0146501	0.102584	Body	NA	Island	ADAMTS7
cg16553427	15	81558344	FALSE	FALSE	FALSE	FALSE	FALSE	FALSE	FALSE	FALSE	4.5	1.36	0.00417847	3.00079e-06	0.0113304	5.08	1.94	0.000713439	0.679884	0.848637	Body	TRUE		IL16
cg10275315	15	83954246	FALSE	FALSE	FALSE	FALSE	FALSE	FALSE	FALSE	FALSE	4.92	1.78	0.0354096	6.55565e-05	0.0428215	4.42	1.28	0.00686824	0.495665	0.750446	TSS1500	NA	S_Shore	BNC1
cg14786290	15	83954849	FALSE	FALSE	FALSE	FALSE	FALSE	FALSE	FALSE	FALSE	4.98	1.84	0.00855423	2.97284e-05	0.0297546	4.02	0.88	0.00132361	0.558256	0.793964	TSS1500	NA	S_Shore	BNC1
cg04171117	15	93652578	FALSE	FALSE	FALSE	FALSE	FALSE	FALSE	FALSE	FALSE	4.48	1.34	0.0506597	3.53229e-06	0.0118291	4.28	1.14	0.020911	0.0506797	0.213857		NA	N_Shore
cg19322380	15	99408636	FALSE	FALSE	TRUE	TRUE	TRUE	FALSE	FALSE	FALSE	5.04	1.9	0.065038	7.24138e-07	0.00517098	4.64	1.5	0.0608578	0.000381057	0.0112558	Body	NA		IGF1R
cg21746425	15	99408804	FALSE	FALSE	TRUE	TRUE	TRUE	FALSE	FALSE	TRUE	4.78	1.62	0.0603008	1.5511e-06	0.00732219	4.6	1.46	0.0244759	0.0108292	0.0807674	Body	NA		IGF1R
cg12553689	15	99408958	FALSE	FALSE	TRUE	TRUE	TRUE	FALSE	FALSE	TRUE	4.82	1.68	0.0611786	1.24598e-07	0.00195292	4.86	1.72	0.0297091	0.00110875	0.0246267	Body	NA		IGF1R
cg07615383	15	99409194	FALSE	FALSE	TRUE	TRUE	TRUE	FALSE	FALSE	TRUE	4.82	1.68	0.059327	3.8169e-06	0.0122583	4.84	1.7	0.0327553	0.00219796	0.0344497	Body	NA		IGF1R
cg00098799	15	99409360	FALSE	FALSE	TRUE	TRUE	TRUE	FALSE	FALSE	TRUE	4.74	1.6	0.083884	9.29205e-05	0.0483193	4.74	1.58	0.0588234	1.4662e-05	0.0012831	Body	TRUE		IGF1R
cg13812291	15	99409411	FALSE	FALSE	TRUE	TRUE	TRUE	FALSE	FALSE	TRUE	4.78	1.64	0.0615596	4.06821e-06	0.0127989	4.9	1.76	0.0386811	0.000204973	0.00770759	Body	TRUE		IGF1R
cg03380198	15	99409506	FALSE	FALSE	TRUE	TRUE	TRUE	FALSE	FALSE	TRUE	4.84	1.7	0.0793649	1.07185e-07	0.00190894	4.64	1.5	0.0462311	1.6707e-05	0.0012831	Body	TRUE		IGF1R
cg02851049	16	101260	FALSE	FALSE	FALSE	FALSE	FALSE	FALSE	FALSE	FALSE	5.08	1.94	0.00474681	7.96666e-05	0.0452384	4.72	1.58	0.0019814	0.0301981	0.161057	Body	NA	N_Shelf	POLR3K
cg00432872	16	349062	FALSE	FALSE	FALSE	FALSE	FALSE	FALSE	FALSE	FALSE	4.98	1.84	0.00785451	1.60488e-07	0.00229878	6.18	3.04	0.000858164	0.752758	0.885327	Body;Body	NA	S_Shore	AXIN1
cg13005329	16	732033	FALSE	FALSE	FALSE	FALSE	FALSE	FALSE	FALSE	FALSE	0.84	3.98	0.015024	5.03466e-06	0.0138613	1.58	4.72	0.00286278	0.742086	0.877658	Body;3'UTR	NA	Island	STUB1 JMJD8
cg00976797	16	1562314	FALSE	FALSE	FALSE	FALSE	FALSE	FALSE	FALSE	FALSE	4.48	1.34	0.0231155	1.5057e-05	0.0220131	6.24	3.1	0.00248957	0.0998751	0.331932	Body	NA	S_Shelf	IFT140
cg03393889	16	2094700	FALSE	FALSE	FALSE	FALSE	FALSE	FALSE	FALSE	FALSE	1.34	4.48	0.0195504	2.9037e-05	0.0296372	2.42	5.56	0.00854566	0.546263	0.785636	Body	NA	N_Shelf	NTHL1
cg22730830	16	2867434	FALSE	TRUE	FALSE	FALSE	FALSE	FALSE	FALSE	FALSE	3.8	0.66	0.0884218	2.76128e-06	0.0109284	3.78	0.64	0.0693041	0.000329039	0.0101081	Body;Body;Body	NA	Island	PRSS21
cg01232511	16	2867446	TRUE	TRUE	FALSE	FALSE	FALSE	FALSE	FALSE	FALSE	3.82	0.68	0.0958332	4.72197e-06	0.0135046	3.9	0.76	0.0975904	0.000147108	0.00597503	Body;Body;Body	NA	Island	PRSS21
cg07798610	16	2867683	FALSE	TRUE	FALSE	FALSE	FALSE	FALSE	FALSE	FALSE	3.86	0.72	0.0871302	6.83369e-05	0.0431613	3.82	0.68	0.0564327	1.56818e-05	0.0012831	Body;Body;Body	NA	Island	PRSS21
cg04468817	16	2903392	FALSE	FALSE	FALSE	FALSE	FALSE	FALSE	FALSE	FALSE	3.9	0.76	0.0348222	4.607e-05	0.0361741	4.52	1.38	0.0219917	0.168712	0.44016	Body	NA	S_Shore	PRSS22
cg07516511	16	2907819	FALSE	FALSE	FALSE	FALSE	FALSE	FALSE	FALSE	FALSE	3.54	0.4	0.0677569	5.14911e-05	0.0377307	3.14	0	0.0656457	4.89343e-05	0.00313179	Body	NA	Island	PRSS22
cg27620871	16	2908219	FALSE	FALSE	FALSE	FALSE	FALSE	FALSE	FALSE	FALSE	3.66	0.52	0.0252245	3.36089e-05	0.0318848	3.14	0	0.0414936	0.00130601	0.0257183	TSS200	NA	S_Shore	PRSS22
cg02256969	16	2908245	FALSE	FALSE	FALSE	FALSE	FALSE	FALSE	FALSE	FALSE	3.56	0.42	0.0204301	4.0624e-05	0.0344629	3.1	6.24	0.0117091	0.0091181	0.0750686	TSS200	NA	S_Shore	PRSS22
cg19328294	16	2908554	FALSE	FALSE	FALSE	FALSE	FALSE	FALSE	FALSE	FALSE	3.82	0.68	0.0240406	6.5667e-05	0.0428215	3.46	0.32	0.0298412	0.00137221	0.0263463	TSS1500	NA	S_Shore	PRSS22
cg05895034	16	2908892	FALSE	FALSE	FALSE	FALSE	FALSE	FALSE	FALSE	FALSE	3.78	0.64	0.0457336	3.6017e-05	0.0326123	3.42	0.28	0.0363316	0.00234506	0.0353138	TSS1500	NA	S_Shore	PRSS22
cg09745688	16	2908918	FALSE	FALSE	FALSE	FALSE	FALSE	FALSE	FALSE	FALSE	3.74	0.6	0.0452765	2.81482e-05	0.0296372	3.24	0.08	0.0405914	0.00948181	0.0750686	TSS1500	NA	S_Shore	PRSS22
cg05490519	16	2908934	FALSE	FALSE	FALSE	FALSE	FALSE	FALSE	FALSE	FALSE	3.68	0.54	0.0433967	2.49698e-05	0.0285924	3.32	0.18	0.0320244	0.00192341	0.0314293	TSS1500	NA	S_Shore	PRSS22
cg00480381	16	7382796	FALSE	FALSE	FALSE	FALSE	FALSE	FALSE	FALSE	FALSE	5.48	2.34	0.00999786	9.61523e-05	0.049306	2	5.14	0.00138304	0.935485	0.982232	Body;5'UTR;Body;1stExon;5'UTR;1stExon;1stExon;5'UTR;Body	NA		A2BP1
cg00461841	16	10523485	FALSE	FALSE	FALSE	FALSE	FALSE	FALSE	FALSE	FALSE	1.62	4.76	0.0190469	9.76139e-08	0.00190894	5.54	2.4	0.00170574	0.617595	0.818757	5'UTR	NA		ATF7IP2
cg08623215	16	19896644	FALSE	FALSE	FALSE	FALSE	FALSE	FALSE	FALSE	FALSE	4.7	1.56	0.027416	3.55836e-05	0.0326123	4.12	0.98	0.0097995	0.543858	0.783645	TSS1500	NA	Island	GPRC5B
cg03780561	16	19897093	FALSE	FALSE	FALSE	FALSE	FALSE	FALSE	FALSE	FALSE	4.56	1.42	0.0123198	3.80245e-05	0.0333678	4	0.86	0.00191732	0.74281	0.877658	TSS1500	NA	Island	GPRC5B
cg01776298	16	23767194	FALSE	FALSE	FALSE	FALSE	FALSE	FALSE	FALSE	FALSE	4.2	1.06	0.0295033	8.00007e-05	0.0453623	3.18	0.04	0.0211062	0.453863	0.715743	Body	NA	S_Shore	CHP2
cg26613361	16	31830668	FALSE	FALSE	FALSE	FALSE	FALSE	FALSE	FALSE	FALSE	4.56	1.42	0.0574601	4.22213e-05	0.0350485	0.58	3.72	0.0128127	0.0494766	0.211224		NA	Island
cg02608963	16	46878553	FALSE	FALSE	FALSE	FALSE	FALSE	FALSE	FALSE	FALSE	4.46	1.3	0.0570996	1.87726e-06	0.00816513	4.38	1.24	0.0382422	0.000210755	0.00770759		NA	Island
cg02120611	16	51909878	FALSE	FALSE	FALSE	FALSE	FALSE	FALSE	FALSE	FALSE	4.7	1.56	0.0333882	2.36787e-05	0.0279447	4.36	1.22	0.0321568	1.20276e-05	0.0012831		TRUE
cg09018739	16	57180107	FALSE	FALSE	FALSE	FALSE	FALSE	FALSE	FALSE	FALSE	0.32	3.46	0.0409453	3.23094e-07	0.00342142	2.7	5.84	0.00362178	0.821748	0.929459	Body	NA		CPNE2
cg05420738	16	66955873	FALSE	FALSE	FALSE	FALSE	FALSE	FALSE	FALSE	FALSE	4.22	1.08	0.031703	1.16655e-05	0.0201837	4.38	1.24	0.00955213	0.342928	0.636631	3'UTR;3'UTR	NA	N_Shore	RRAD
cg08770961	16	66956122	FALSE	FALSE	FALSE	FALSE	FALSE	FALSE	FALSE	FALSE	4.24	1.1	0.0524015	2.14462e-05	0.0263701	1.54	4.68	0.00690388	0.742164	0.877658	Body;Body	NA	Island	RRAD
cg15482422	16	66956240	FALSE	FALSE	FALSE	FALSE	FALSE	FALSE	FALSE	FALSE	4.2	1.06	0.0408659	3.09385e-05	0.0303137	0.08	3.22	0.00113088	0.852952	0.947999	Body;Body	NA	Island	RRAD
cg09906145	16	67562424	FALSE	FALSE	FALSE	FALSE	FALSE	FALSE	FALSE	FALSE	1.24	4.38	0.0176367	2.53735e-05	0.0285924	4.26	1.12	0.00184435	0.933047	0.982232	TSS1500	NA	N_Shore	FAM65A
cg07469744	16	67695950	FALSE	FALSE	FALSE	FALSE	FALSE	FALSE	FALSE	FALSE	1.58	4.72	0.0201001	9.1685e-05	0.048026	5.62	2.48	0.00857641	0.271512	0.574174	Body;TSS1500;TSS1500;Body;TSS1500	NA	S_Shore	PARD6A ACD
cg06572953	16	82204046	FALSE	FALSE	FALSE	FALSE	FALSE	FALSE	FALSE	FALSE	2.62	5.76	0.00575165	2.38452e-05	0.0280567	4.42	1.28	0.00503221	0.0100874	0.0782538	TSS1500	NA	Island	MPHOSPH6
cg00114159	16	85316101	FALSE	FALSE	FALSE	FALSE	FALSE	FALSE	FALSE	FALSE	4.58	1.44	0.00697007	3.20035e-05	0.0311152	5.22	2.08	0.00337525	0.404877	0.687933		NA	N_Shore
cg05398940	16	89351098	FALSE	FALSE	FALSE	FALSE	FALSE	FALSE	FALSE	FALSE	5.34	2.2	0.01067	6.12142e-05	0.0416402	3.3	0.16	0.0051547	0.619398	0.818757	Body	NA	N_Shore	ANKRD11
cg26916609	16	89964723	FALSE	FALSE	FALSE	FALSE	FALSE	FALSE	FALSE	FALSE	5.14	2	0.008404	2.82699e-05	0.0296372	2.74	5.88	0.000918269	0.434545	0.710285	Body	NA		TCF25
cg24667510	17	3705631	FALSE	FALSE	FALSE	FALSE	FALSE	FALSE	FALSE	FALSE	6.08	2.94	0.0214057	3.64617e-05	0.0327989	4.06	0.92	0.00255606	0.997032	0.99754	TSS1500	TRUE		ITGAE
cg23178322	17	7518094	FALSE	FALSE	FALSE	FALSE	FALSE	FALSE	FALSE	FALSE	3.98	0.84	0.0126757	1.48333e-05	0.0218214	4.66	1.52	0.00689941	0.594248	0.801786	1stExon;5'UTR;Body	NA	Island	FXR2 SHBG
cg03021260	17	15169177	FALSE	FALSE	FALSE	FALSE	FALSE	TRUE	FALSE	FALSE	4.26	1.12	0.0100326	5.16424e-06	0.0140454	5.08	1.92	0.00302487	0.164055	0.434463	TSS1500	NA	S_Shelf	PMP22
cg19811683	17	16587128	FALSE	FALSE	FALSE	FALSE	FALSE	FALSE	FALSE	FALSE	4.28	1.14	0.074905	1.18e-05	0.0201837	4.9	1.76	0.00976674	0.665961	0.84399		NA
cg26297950	17	17124828	FALSE	FALSE	FALSE	FALSE	FALSE	FALSE	FALSE	FALSE	4.92	1.78	0.00736959	3.6598e-05	0.0328138	5.12	1.98	0.00140508	0.309569	0.616061	Body;Body	NA	Island	FLCN
cg10965183	17	17380635	FALSE	FALSE	FALSE	FALSE	FALSE	FALSE	FALSE	FALSE	1.62	4.76	0.00271134	8.88184e-05	0.0476722	0.18	3.32	0.000974162	0.137308	0.392016	Body	NA	S_Shore	MED9
cg12324629	17	19771548	FALSE	FALSE	FALSE	FALSE	FALSE	FALSE	FALSE	FALSE	3.06	6.2	0.0266727	9.05619e-05	0.0479983	1.32	4.46	0.011688	0.070155	0.264113	TSS1500;TSS1500	NA	N_Shore	ULK2
cg21902394	17	19883326	FALSE	FALSE	FALSE	FALSE	FALSE	FALSE	FALSE	FALSE	4.62	1.48	0.023536	9.20359e-05	0.0481455	5.18	2.04	0.00481847	0.496389	0.750446		NA	Island
cg15193133	17	19883474	FALSE	FALSE	FALSE	FALSE	FALSE	FALSE	FALSE	FALSE	4.26	1.12	0.0525778	3.73306e-05	0.033092	4.26	1.12	0.00638626	0.576206	0.799198		NA	Island
cg12684052	17	19883602	FALSE	FALSE	FALSE	FALSE	FALSE	FALSE	FALSE	FALSE	4.32	1.18	0.0592485	5.37582e-06	0.0141605	4.86	1.72	0.0216917	0.0910792	0.315357		NA	Island
cg07870541	17	20687481	FALSE	FALSE	FALSE	FALSE	FALSE	FALSE	FALSE	FALSE	4.48	1.34	0.0546034	4.03113e-09	0.000526485	3.94	0.8	0.0242846	0.00943027	0.0750686		NA	N_Shore
cg07009904	17	21023142	FALSE	FALSE	FALSE	FALSE	FALSE	FALSE	FALSE	FALSE	4.68	1.54	0.00406165	1.26184e-05	0.0206874	2.5	5.66	0.00116844	0.518154	0.767785		NA
cg19131647	17	27397005	TRUE	TRUE	FALSE	FALSE	FALSE	FALSE	FALSE	FALSE	4.14	1	0.0564813	8.83177e-05	0.0475985	4.64	1.5	0.0109092	0.847077	0.943958		NA
cg11129343	17	27717641	FALSE	FALSE	FALSE	FALSE	FALSE	FALSE	FALSE	FALSE	3.94	0.8	0.0048571	2.6104e-05	0.0286497	4.76	1.62	0.00286648	0.320103	0.624003	TSS1500	NA	Island	TAOK1
cg05174890	17	33759986	FALSE	TRUE	FALSE	FALSE	FALSE	FALSE	FALSE	FALSE	3.84	0.7	0.0127562	9.40578e-05	0.048619	4.46	1.32	0.012895	0.308922	0.616061	TSS1500	NA		SLFN12
cg05540569	17	37093398	FALSE	FALSE	FALSE	FALSE	FALSE	FALSE	FALSE	FALSE	1.14	4.28	0.00868284	1.14289e-05	0.0201122	4.08	0.92	0.00161863	0.715046	0.871212	3'UTR	NA		FBXO47
cg07723258	17	38176064	FALSE	FALSE	FALSE	FALSE	FALSE	FALSE	FALSE	FALSE	5.8	2.64	0.0379972	9.12151e-05	0.0479983	0.6	3.76	0.002008	0.670219	0.845202	Body;Body	TRUE		MED24
cg26094004	17	42075116	FALSE	FALSE	FALSE	FALSE	FALSE	FALSE	FALSE	FALSE	1.38	4.52	0.0498482	8.22231e-07	0.00520639	0.66	3.8	0.0102571	0.342001	0.636631	5'UTR	NA	S_Shelf	PYY
cg22791987	17	43037114	FALSE	FALSE	FALSE	FALSE	FALSE	FALSE	FALSE	FALSE	3.82	0.68	0.0233121	5.95131e-05	0.0411253	3.98	0.82	0.00523371	0.485256	0.741049	3'UTR	TRUE	N_Shore	C1QL1
cg18026225	17	43198423	FALSE	FALSE	FALSE	FALSE	FALSE	FALSE	FALSE	FALSE	3.88	0.74	0.0733771	9.79519e-07	0.00590445	4.62	1.48	0.0283536	0.00271741	0.0393768	Body	NA	Island	PLCD3
cg02957270	17	46508097	FALSE	FALSE	FALSE	FALSE	FALSE	FALSE	FALSE	FALSE	3.74	0.6	0.0218716	1.89274e-05	0.0247201	4.42	1.28	0.0156997	0.00858883	0.074957	TSS1500;TSS1500	NA	S_Shore	SKAP1
cg05555337	17	46669113	FALSE	FALSE	FALSE	FALSE	FALSE	FALSE	FALSE	FALSE	5.12	1.98	0.0120036	4.28701e-06	0.0131227	4.16	1.02	0.00255491	0.450042	0.714116	TSS1500;3'UTR;Body;TSS1500;Body	NA	N_Shore	LOC404266 HOXB5
cg02865928	17	47983346	FALSE	FALSE	FALSE	FALSE	FALSE	TRUE	FALSE	FALSE	4.7	1.56	0.0193878	5.87795e-05	0.040907	4.24	1.1	0.0182397	0.044086	0.198		NA	S_Shelf
cg24180162	17	48250505	FALSE	FALSE	FALSE	FALSE	FALSE	TRUE	FALSE	FALSE	5.2	2.06	0.0122672	2.48729e-06	0.0102585	4.92	1.76	0.00440955	0.592355	0.801786	TSS1500;TSS1500;Body;Body	TRUE		HILS1 SGCA
cg27224791	17	48250645	FALSE	FALSE	FALSE	FALSE	FALSE	TRUE	FALSE	FALSE	5.14	2	0.00810448	5.05895e-06	0.0138613	0.94	4.08	0.00169423	0.312012	0.616061	TSS1500;TSS1500;Body;Body	TRUE		HILS1 SGCA
cg13360200	17	48797403	FALSE	FALSE	FALSE	FALSE	FALSE	FALSE	FALSE	FALSE	1.8	4.94	0.00940614	3.02623e-06	0.0113304	0.38	3.52	0.00151031	0.796402	0.912538	Body;Body	NA	S_Shore	LUC7L3
cg12582317	17	55822272	FALSE	FALSE	FALSE	FALSE	FALSE	FALSE	FALSE	FALSE	0.22	3.36	0.0413158	7.53299e-05	0.0441734	5.42	2.28	0.0144199	0.300701	0.606137		NA
cg20464360	17	56564855	FALSE	FALSE	FALSE	FALSE	FALSE	FALSE	FALSE	FALSE	4.62	1.48	0.0372853	8.03424e-05	0.0454903	4.98	1.84	0.0262525	0.00371259	0.0475532	Body	NA	Island	HSF5
cg01109337	17	56744332	FALSE	FALSE	TRUE	TRUE	FALSE	FALSE	FALSE	FALSE	4.78	1.64	0.0460655	3.28378e-05	0.0316207	4.26	1.12	0.022798	0.0725511	0.269175	5'UTR;5'UTR	NA		TEX14
cg15249796	17	56744413	FALSE	FALSE	TRUE	TRUE	FALSE	FALSE	FALSE	FALSE	4.96	1.82	0.0564901	2.41461e-05	0.0283257	4.36	1.22	0.0300863	0.0539742	0.221669	5'UTR;5'UTR	TRUE		TEX14
cg09019432	17	62503014	FALSE	FALSE	FALSE	FALSE	FALSE	FALSE	FALSE	FALSE	4.38	1.24	0.00334425	1.99114e-05	0.0255975	5.56	2.42	0.00182561	0.576505	0.799198	TSS200;TSS1500	NA	Island	CCDC45 DDX5
cg08352115	17	66356057	FALSE	FALSE	FALSE	FALSE	FALSE	FALSE	FALSE	FALSE	5.28	2.14	0.0326334	6.53377e-05	0.0428215	2.68	5.82	0.0105229	0.532073	0.775562	Body	TRUE		ARSG
cg00221096	17	67312052	FALSE	FALSE	FALSE	FALSE	FALSE	FALSE	FALSE	FALSE	2.2	5.34	0.0122076	8.62958e-06	0.0177957	6	2.86	0.000369852	0.962515	0.987996	5'UTR;TSS1500	NA		ABCA5
cg01369276	17	67312371	FALSE	FALSE	FALSE	FALSE	FALSE	FALSE	FALSE	FALSE	2.2	5.34	0.0129168	2.4339e-05	0.028382	5.94	2.8	0.00281693	0.668363	0.845202	5'UTR;TSS1500	NA		ABCA5
cg02275878	17	72919391	FALSE	FALSE	FALSE	FALSE	FALSE	FALSE	FALSE	FALSE	4.26	1.12	0.0161462	1.67232e-06	0.00770869	3.72	0.58	0.000177375	0.860365	0.950734	TSS1500;TSS200	TRUE	Island	OTOP2 USH1G
cg26545162	17	74075092	FALSE	FALSE	FALSE	FALSE	FALSE	TRUE	FALSE	FALSE	5.02	1.88	0.0317423	1.39891e-05	0.0215792	4.42	1.28	0.00963103	0.199786	0.480331	TSS200	NA	S_Shore	ZACN
cg16301617	17	76128906	FALSE	FALSE	FALSE	FALSE	FALSE	TRUE	FALSE	FALSE	6.24	3.1	0.0209383	8.85366e-05	0.0476509	2.36	5.5	0.000395374	0.936897	0.982232	Body;TSS1500	NA	S_Shore	TMC8 TMC6
cg16017144	17	77100082	FALSE	FALSE	FALSE	FALSE	FALSE	FALSE	FALSE	FALSE	3.3	0.16	0.0509573	8.36567e-05	0.0463285	4.18	1.04	0.0136233	0.110981	0.356523	Body	TRUE	Island	HRNBP3
cg09964933	17	78856246	FALSE	FALSE	FALSE	FALSE	FALSE	FALSE	FALSE	FALSE	5	1.86	0.00704689	1.13868e-05	0.0201122	1.46	4.6	0.000357283	0.895196	0.963853	Body;Body	NA	N_Shore	RPTOR
cg10063663	17	79038712	FALSE	FALSE	FALSE	FALSE	FALSE	FALSE	FALSE	FALSE	5.04	1.9	0.00411522	8.05347e-05	0.0454929	4.82	1.68	0.00109719	0.35057	0.643293	Body;Body;Body;Body	TRUE		BAIAP2
cg05569220	17	79138873	FALSE	FALSE	FALSE	FALSE	FALSE	TRUE	FALSE	FALSE	1.26	4.4	0.0197263	4.87128e-06	0.0137312	5.56	2.42	0.00354548	0.939323	0.982232	TSS1500;Body	NA	N_Shore	LOC388428 AATK
cg11225357	17	79339278	FALSE	FALSE	FALSE	FALSE	FALSE	TRUE	FALSE	FALSE	4.28	1.14	0.0437992	9.34604e-05	0.0484379	4.06	0.92	0.0288465	0.0436124	0.197967		TRUE
cg26148904	17	79339342	FALSE	FALSE	FALSE	FALSE	FALSE	TRUE	FALSE	FALSE	4.26	1.12	0.0321227	7.32716e-05	0.0435643	4.16	1.02	0.0197974	0.175002	0.443568		TRUE
cg18919720	17	79495335	FALSE	FALSE	FALSE	FALSE	FALSE	FALSE	FALSE	FALSE	4.18	1.04	0.0389849	4.86264e-05	0.0367439	4.62	1.48	0.0245256	0.121242	0.365615	TSS200;TSS200	NA	Island	FSCN2
cg26603632	17	80201887	FALSE	FALSE	FALSE	FALSE	FALSE	FALSE	FALSE	FALSE	5.08	1.94	0.00580217	7.97294e-06	0.0169778	0.64	3.78	8.07343e-05	0.632131	0.827047		NA	N_Shore
cg17842879	17	80328714	FALSE	FALSE	FALSE	FALSE	FALSE	FALSE	FALSE	FALSE	5.26	2.12	0.031148	4.28039e-05	0.0350862	4.72	1.58	0.0127083	0.485852	0.741049		TRUE	N_Shore
cg12180316	17	80681317	FALSE	FALSE	FALSE	FALSE	FALSE	FALSE	FALSE	FALSE	5.4	2.26	0.0318935	1.26343e-05	0.0206874	4.72	1.58	0.00205797	0.767635	0.897326	Body	NA		FN3KRP
cg02711726	17	80685570	FALSE	FALSE	FALSE	FALSE	FALSE	FALSE	FALSE	FALSE	4.44	1.3	0.00953188	7.21244e-05	0.0435643	2.02	5.16	0.00101647	0.8435	0.942952	3'UTR	NA	N_Shore	FN3KRP
cg14524754	17	80925103	FALSE	FALSE	FALSE	FALSE	FALSE	FALSE	FALSE	FALSE	1.4	4.54	0.0331038	4.66801e-07	0.00427624	0.8	3.94	0.00137797	0.943397	0.982232	Body	NA	N_Shelf	B3GNTL1
cg24042899	17	80986552	FALSE	FALSE	FALSE	FALSE	FALSE	FALSE	FALSE	FALSE	5.42	2.28	0.0195932	8.69795e-05	0.0473708	4.94	1.8	0.000244607	0.947052	0.982232	Body	NA	N_Shelf	B3GNTL1
cg18593210	17	81021770	FALSE	FALSE	FALSE	FALSE	FALSE	TRUE	FALSE	FALSE	1.5	4.64	0.0155734	7.20438e-05	0.0435643	3.36	0.2	0.00403134	0.393449	0.677768		NA	N_Shelf
cg20322862	18	3412088	FALSE	FALSE	FALSE	FALSE	FALSE	FALSE	FALSE	FALSE	4.32	1.18	0.0395432	4.64419e-06	0.0134789	3.94	0.8	0.0179943	0.0387192	0.18022	5'UTR;1stExon	NA		TGIF1
cg12899381	18	5891602	FALSE	FALSE	FALSE	FALSE	FALSE	FALSE	FALSE	FALSE	4.3	1.16	0.053491	2.84189e-05	0.0296372	4.98	1.84	0.0172477	0.0680114	0.261164	1stExon	NA	Island	TMEM200C
cg26438105	18	5892119	FALSE	FALSE	FALSE	FALSE	FALSE	FALSE	FALSE	FALSE	4.32	1.18	0.0691331	9.66879e-06	0.0190448	4.86	1.72	0.0316801	0.0095514	0.0750686	TSS200	NA	S_Shore	TMEM200C
cg27093273	18	5892213	FALSE	FALSE	FALSE	FALSE	FALSE	FALSE	FALSE	FALSE	4.36	1.22	0.0603669	1.54189e-05	0.0220487	4.76	1.62	0.0282511	0.000827838	0.0198681	TSS200	NA	S_Shore	TMEM200C
cg17586988	18	5892245	FALSE	FALSE	FALSE	FALSE	FALSE	FALSE	FALSE	FALSE	4.16	1.02	0.072779	5.23367e-06	0.0140454	4.78	1.64	0.0142592	0.0795879	0.286965	TSS200	NA	S_Shore	TMEM200C
cg15976763	18	24443729	FALSE	FALSE	FALSE	FALSE	FALSE	FALSE	FALSE	FALSE	4.38	1.24	0.0177283	5.27973e-05	0.0381233	4.14	1	0.0108225	0.0161864	0.108713	TSS1500;Body	TRUE	S_Shore	AQP4
cg16870867	18	45275452	FALSE	FALSE	FALSE	FALSE	FALSE	FALSE	FALSE	FALSE	4.26	1.12	0.0355424	2.06006e-05	0.0259646	4.6	1.46	0.0212828	0.00340984	0.0459431		NA	Island
cg19042497	18	47723894	FALSE	FALSE	FALSE	FALSE	FALSE	FALSE	FALSE	FALSE	2.84	5.98	0.0177735	5.99978e-06	0.0150692	3.64	0.5	0.00783593	0.0252482	0.141537		NA	S_Shelf
cg14613786	18	48255506	FALSE	FALSE	FALSE	FALSE	FALSE	FALSE	FALSE	FALSE	4.34	1.2	0.0455975	5.18235e-05	0.0378122	4.18	1.02	0.0401504	0.00568213	0.0632446	Body	NA	N_Shore	MAPK4
cg13939809	18	61669940	FALSE	FALSE	FALSE	FALSE	FALSE	FALSE	FALSE	FALSE	4.04	0.9	0.0579691	1.8672e-09	0.000365798	4.42	1.28	0.0333165	9.88273e-06	0.0012831		NA	Island
cg06595072	18	61670207	FALSE	FALSE	FALSE	FALSE	FALSE	FALSE	FALSE	FALSE	3.92	0.78	0.0436237	5.02042e-07	0.00427624	4.28	1.14	0.0210806	0.00748977	0.0701481		NA	Island
cg12016792	18	77518229	FALSE	FALSE	FALSE	FALSE	FALSE	FALSE	FALSE	FALSE	5.22	2.08	0.00700261	5.45065e-05	0.0388298	5.98	2.84	0.000740607	0.994703	0.99754		NA	S_Shelf
cg25698978	18	77794300	FALSE	FALSE	FALSE	FALSE	FALSE	FALSE	FALSE	FALSE	2.08	5.22	0.0066122	2.35221e-05	0.0279447	2.08	5.22	0.00154155	0.986485	0.995559	TSS200	NA	N_Shore	C18orf22
cg13287964	18	77905751	FALSE	FALSE	TRUE	TRUE	TRUE	FALSE	FALSE	TRUE	4.64	1.5	0.063935	1.59476e-05	0.0225555	4.3	1.16	0.043252	0.00748239	0.0701481	TSS200;TSS200	NA	S_Shore	LOC100130522
cg06595479	19	519035	FALSE	FALSE	FALSE	FALSE	FALSE	FALSE	FALSE	FALSE	3.68	0.54	0.0493904	7.92669e-05	0.0451423	5.2	2.06	0.0183974	0.207127	0.490076	Body	TRUE	Island	C19orf20
cg27535410	19	846354	FALSE	FALSE	FALSE	FALSE	FALSE	TRUE	FALSE	FALSE	5.68	2.54	0.0368972	7.79569e-05	0.0450339	5.68	2.54	0.00835602	0.474786	0.735153	Body	NA	Island	PRTN3
cg02618733	19	1789460	FALSE	FALSE	FALSE	FALSE	FALSE	FALSE	FALSE	FALSE	4.48	1.34	0.0373835	2.64324e-06	0.0105679	4.88	1.74	0.0153171	0.0825055	0.294717	Body	TRUE	Island	ATP8B3
cg17771569	19	1789618	FALSE	FALSE	FALSE	FALSE	FALSE	FALSE	FALSE	FALSE	4.44	1.3	0.0536397	3.6808e-06	0.012197	5.06	1.92	0.0222651	0.0329998	0.165677	Body	TRUE	Island	ATP8B3
cg22906451	19	1994824	FALSE	FALSE	FALSE	FALSE	FALSE	FALSE	FALSE	FALSE	5	1.86	0.0119406	1.67301e-05	0.0229198	5.94	2.8	0.00156664	0.350641	0.643293	Body	NA	S_Shore	BTBD2
cg02479575	19	4769653	FALSE	FALSE	FALSE	FALSE	FALSE	FALSE	FALSE	FALSE	3	6.14	0.00244672	4.92586e-05	0.0367439	0.76	3.92	0.000256945	0.443915	0.710285	TSS1500;Body	NA		MIR7-3 C19orf30
cg22161299	19	11468272	FALSE	FALSE	FALSE	FALSE	FALSE	FALSE	FALSE	FALSE	1.04	4.18	0.0271167	1.64614e-05	0.0227908	1.04	4.18	0.014312	0.002873	0.0408605	5'UTR;5'UTR	NA	S_Shore	LPPR2
cg13316977	19	12865609	FALSE	FALSE	FALSE	FALSE	FALSE	FALSE	FALSE	FALSE	4.22	1.08	0.0407363	4.47849e-05	0.0358528	4.7	1.56	0.0249298	0.04951	0.211224	Body	NA	Island	BEST2
cg02981989	19	14937541	FALSE	FALSE	FALSE	FALSE	FALSE	TRUE	FALSE	FALSE	5.58	2.44	0.00746	3.49553e-06	0.0118069	4.34	1.2	0.00173578	0.330253	0.635046	1stExon;3'UTR	NA		OR7A5
cg02890250	19	16243834	FALSE	FALSE	FALSE	FALSE	FALSE	FALSE	FALSE	FALSE	0.98	4.12	0.0145434	1.0102e-05	0.0192748	2.28	5.42	0.0142922	0.194489	0.471192	TSS1500;3'UTR	NA		HSH2D RAB8A
cg04273661	19	18896581	FALSE	FALSE	FALSE	FALSE	FALSE	FALSE	FALSE	FALSE	4.7	1.56	0.034837	3.32892e-05	0.0318309	4.82	1.68	0.00914143	0.49449	0.750446	Body	NA	Island	COMP
cg09414724	19	19976638	FALSE	FALSE	FALSE	FALSE	FALSE	FALSE	FALSE	FALSE	4.28	1.14	0.00608456	4.93309e-06	0.0138061	5.56	2.42	0.00227654	0.115388	0.356523	TSS200	NA		ZNF253
cg27379065	19	20011538	FALSE	FALSE	FALSE	FALSE	FALSE	FALSE	FALSE	FALSE	4.4	1.26	0.014862	4.43044e-06	0.0132512	2.46	5.6	0.00193522	0.944284	0.982232	TSS200	NA	N_Shore	ZNF93
cg19327544	19	20149684	FALSE	FALSE	FALSE	FALSE	FALSE	FALSE	FALSE	FALSE	4.26	1.12	0.00664532	2.15055e-05	0.0263701	3.94	0.8	0.00209241	0.339505	0.635951	5'UTR;Body	NA	N_Shore	ZNF682
cg21751540	19	21541537	FALSE	FALSE	FALSE	FALSE	FALSE	FALSE	FALSE	FALSE	4.44	1.3	0.0289392	5.24345e-05	0.0380319	2.96	6.1	0.00279212	0.715801	0.871212	TSS200	NA		ZNF738
cg17960886	19	22800629	FALSE	FALSE	FALSE	FALSE	FALSE	FALSE	FALSE	FALSE	4.58	1.44	0.0500601	7.10309e-06	0.0161808	4.9	1.76	0.0209086	0.0461894	0.203871		NA	N_Shore
cg01545223	19	22801034	FALSE	FALSE	FALSE	FALSE	FALSE	FALSE	FALSE	FALSE	4.74	1.6	0.0498108	1.30759e-05	0.0211707	4.62	1.48	0.0136528	0.78353	0.90899		NA	Island
cg22340508	19	22891978	FALSE	FALSE	FALSE	FALSE	FALSE	FALSE	FALSE	FALSE	4.06	0.92	0.0506747	4.56796e-05	0.0359771	4.52	1.38	0.0261713	0.0206912	0.125888		NA	Island
cg10721834	19	22990066	FALSE	FALSE	FALSE	FALSE	FALSE	FALSE	FALSE	FALSE	3.82	0.68	0.0457497	1.61199e-05	0.022638	4.48	1.34	0.0144307	0.190799	0.465586		NA	Island
cg03339609	19	34662636	FALSE	FALSE	FALSE	FALSE	FALSE	FALSE	FALSE	FALSE	1.24	4.38	0.0202209	1.47687e-05	0.0218214	5.3	2.16	0.00769666	0.518855	0.767785	TSS1500;TSS1500	NA	N_Shore	LSM14A
cg21501412	19	36507004	FALSE	FALSE	FALSE	FALSE	FALSE	FALSE	FALSE	FALSE	5.06	1.92	0.00701924	3.58356e-05	0.0326123	4.36	1.22	0.000729121	0.893495	0.963853	3'UTR	NA	S_Shore	CLIP3
cg08871608	19	40729274	TRUE	TRUE	FALSE	FALSE	FALSE	FALSE	FALSE	FALSE	4.56	1.4	0.0478305	3.64978e-05	0.0327989	5.44	2.3	0.00762629	0.174193	0.443568	Body	TRUE	Island	CNTD2
cg00851394	19	40730425	FALSE	FALSE	FALSE	FALSE	FALSE	FALSE	FALSE	FALSE	4.72	1.58	0.0547113	2.13809e-08	0.000749576	4.66	1.52	0.0183637	0.593438	0.801786	Body	NA	Island	CNTD2
cg23850904	19	40730628	FALSE	FALSE	FALSE	FALSE	FALSE	FALSE	FALSE	FALSE	4.52	1.36	0.0540327	1.70465e-05	0.0231477	4.82	1.68	0.0155138	0.350963	0.643293	Body	NA	Island	CNTD2
cg24923931	19	40904691	TRUE	TRUE	TRUE	TRUE	TRUE	FALSE	FALSE	FALSE	4.46	1.32	0.0741214	6.27031e-06	0.0153664	3.92	0.78	0.0146392	0.238383	0.531156	Body;Body	NA	Island	PRX
cg00478479	19	40904851	FALSE	TRUE	TRUE	TRUE	TRUE	FALSE	FALSE	FALSE	4.04	0.9	0.08512	7.8027e-07	0.00520639	3.9	0.76	0.0152827	0.368978	0.662091	Body;Body	NA	Island	PRX
cg20964856	19	41767669	FALSE	FALSE	FALSE	FALSE	FALSE	FALSE	FALSE	FALSE	1.46	4.6	0.0197503	4.59545e-06	0.0134789	5.9	2.74	0.00655444	0.220331	0.50815	TSS1500;3'UTR;3'UTR	NA	N_Shore	HNRNPUL1 AXL
cg19701101	19	42749952	FALSE	FALSE	FALSE	FALSE	FALSE	FALSE	FALSE	FALSE	1.28	4.44	0.0159377	1.4481e-05	0.0217269	5.7	2.56	0.00127768	0.939665	0.982232		TRUE	S_Shore
cg07855456	19	43912227	FALSE	FALSE	TRUE	TRUE	FALSE	FALSE	FALSE	FALSE	4.08	0.94	0.0770112	3.75292e-06	0.012197	4.42	1.28	0.0199779	0.300532	0.606137	Body	NA	Island	TEX101
cg21198638	19	46525566	FALSE	TRUE	TRUE	TRUE	FALSE	FALSE	FALSE	FALSE	4.4	1.26	0.0497874	2.992e-05	0.0298297	3.88	0.74	0.03445	7.72146e-05	0.00348828	Body	TRUE	N_Shore	PGLYRP1
cg10599948	19	49244571	FALSE	FALSE	FALSE	FALSE	FALSE	FALSE	FALSE	FALSE	3.76	0.62	0.0417304	7.53889e-05	0.0441734	5.46	2.32	0.0117757	0.510748	0.763958	Body;TSS1500	NA	S_Shore	IZUMO1 RASIP1
cg26931208	19	49244592	FALSE	FALSE	FALSE	FALSE	FALSE	FALSE	FALSE	FALSE	3.76	0.62	0.0486623	4.56135e-05	0.0359771	5.36	2.22	0.00940073	0.757977	0.888743	Body;TSS1500	NA	S_Shore	IZUMO1 RASIP1
cg22645062	19	49494771	FALSE	FALSE	FALSE	FALSE	FALSE	FALSE	FALSE	FALSE	5.84	2.7	0.0140685	3.54808e-05	0.0326123	2.88	6.02	0.0013107	0.427149	0.710066	Body;Body;Body	NA	N_Shore	GYS1
cg17434634	19	49522954	TRUE	TRUE	FALSE	FALSE	FALSE	FALSE	FALSE	FALSE	3.94	0.8	0.0764683	3.71091e-06	0.012197	4.06	0.92	0.0484053	0.0492775	0.211224		TRUE	Island
cg03282345	19	49934577	FALSE	FALSE	FALSE	FALSE	FALSE	FALSE	FALSE	FALSE	4.2	1.04	0.0373112	2.68877e-05	0.0290607	3.48	0.34	0.011974	0.0885374	0.309076	Body	NA	Island	SLC17A7
cg16909495	19	49940062	FALSE	FALSE	FALSE	FALSE	FALSE	FALSE	FALSE	FALSE	4.12	0.98	0.0290475	6.73144e-06	0.0156064	4.58	1.44	0.0191192	0.0038441	0.0483979	Body	NA	S_Shore	SLC17A7
cg10808198	19	50147644	FALSE	FALSE	FALSE	FALSE	FALSE	FALSE	FALSE	FALSE	4.84	1.7	0.0365178	1.01831e-05	0.0192748	0.34	3.5	0.0187418	0.0470289	0.204058	5'UTR	NA	S_Shore	SCAF1
cg14106680	19	50733985	FALSE	FALSE	TRUE	TRUE	FALSE	FALSE	FALSE	FALSE	4.6	1.46	0.0676217	6.97702e-06	0.0159865	3.28	0.14	0.0293831	0.0661279	0.256496	Body;Body;Body	NA	Island	MYH14
cg02192974	19	50734272	FALSE	FALSE	TRUE	TRUE	FALSE	FALSE	FALSE	FALSE	4.58	1.44	0.0537155	6.71039e-05	0.0428911	2.54	5.68	0.0215194	0.180614	0.451857	Body;Body;Body	NA	Island	MYH14
cg11992783	19	50734287	FALSE	FALSE	TRUE	TRUE	FALSE	FALSE	FALSE	FALSE	4.52	1.38	0.0769184	7.30225e-06	0.0164044	3.1	6.24	0.0315713	0.0572876	0.227963	Body;Body;Body	NA	Island	MYH14
cg12530021	19	52004630	FALSE	FALSE	FALSE	FALSE	FALSE	TRUE	FALSE	FALSE	1.22	4.36	0.0201569	1.23134e-05	0.0204629	6.12	2.98	0.00476188	0.431078	0.710285	1stExon;TSS1500	NA		SIGLEC12
cg20962215	19	54713514	FALSE	FALSE	FALSE	FALSE	FALSE	FALSE	FALSE	FALSE	1.92	5.06	0.0232754	6.48834e-05	0.0427265	5.18	2.04	0.00718059	0.171181	0.441896		NA	S_Shelf
cg04358463	19	56215104	FALSE	FALSE	FALSE	FALSE	FALSE	FALSE	FALSE	FALSE	4.6	1.46	0.0629744	3.81883e-05	0.0333792	0.36	3.52	0.00388106	0.648176	0.833749		NA	N_Shore
cg23679798	19	56654827	FALSE	FALSE	FALSE	FALSE	FALSE	FALSE	FALSE	FALSE	4.68	1.54	0.00722912	4.61368e-06	0.0134789	4.88	1.74	0.00040011	0.739266	0.877658	5'UTR	NA	N_Shelf	ZNF444
cg01023593	19	58962093	FALSE	FALSE	FALSE	FALSE	FALSE	FALSE	FALSE	FALSE	4.62	1.48	0.018809	6.97512e-05	0.0434055	0.16	3.3	0.00388087	0.0208174	0.125888	TSS1500	NA	N_Shore	ZNF324B
cg08317681	20	279585	FALSE	FALSE	FALSE	FALSE	FALSE	FALSE	FALSE	FALSE	2.36	5.5	0.00446024	7.6929e-05	0.0445227	3.24	0.1	0.000292812	0.694832	0.861751	1stExon;3'UTR	NA	S_Shore	ZCCHC3
cg23908269	20	3868713	FALSE	FALSE	FALSE	FALSE	FALSE	FALSE	FALSE	FALSE	1.92	5.06	0.0198047	1.99649e-05	0.0255975	3.58	0.44	0.0012446	0.875145	0.958214	TSS1500;TSS1500	NA	N_Shore	PANK2
cg21235746	20	5485144	FALSE	FALSE	FALSE	FALSE	FALSE	FALSE	FALSE	FALSE	4.62	1.48	0.0689132	1.78092e-05	0.0236539	4.5	1.36	0.0682438	0.0215631	0.127853	Body	NA		LOC149837
cg03287299	20	5485245	FALSE	FALSE	FALSE	FALSE	FALSE	FALSE	FALSE	FALSE	4.5	1.36	0.053699	2.7293e-05	0.0290607	4.42	1.28	0.0547803	0.0305471	0.161588	TSS200	NA		LOC149837
cg25958766	20	5485268	FALSE	FALSE	FALSE	FALSE	FALSE	FALSE	FALSE	FALSE	4.58	1.44	0.0608671	2.90565e-05	0.0296372	4.48	1.34	0.0550309	0.022447	0.130601	TSS200	NA		LOC149837
cg20295248	20	5485270	FALSE	FALSE	FALSE	FALSE	FALSE	FALSE	FALSE	FALSE	4.5	1.36	0.078631	6.47728e-05	0.0427265	4.4	1.26	0.0846545	0.010223	0.0785126	TSS200	NA		LOC149837
cg16763089	20	5485284	FALSE	FALSE	FALSE	FALSE	FALSE	FALSE	FALSE	FALSE	4.54	1.4	0.0830393	5.79321e-06	0.0146581	4.4	1.26	0.086577	0.00939206	0.0750686	TSS200	NA		LOC149837
cg10831901	20	5485294	FALSE	FALSE	FALSE	FALSE	FALSE	FALSE	FALSE	FALSE	4.52	1.38	0.0771379	3.21824e-06	0.0113976	4.34	1.2	0.0750039	0.0151589	0.104883	TSS200	NA		LOC149837
cg27158481	20	25128681	FALSE	FALSE	FALSE	FALSE	FALSE	FALSE	FALSE	FALSE	4.4	1.26	0.0409624	5.51389e-05	0.0391302	4.02	0.88	0.0265672	0.00254013	0.0375158	TSS200;Body;Body	TRUE	N_Shore	LOC284798
cg11632685	20	25128770	FALSE	FALSE	FALSE	FALSE	FALSE	FALSE	FALSE	FALSE	4.48	1.34	0.0376631	1.35545e-06	0.00698165	4.1	0.96	0.0117575	0.0531318	0.219471	TSS200;Body;Body	TRUE	Island	LOC284798
cg20310608	20	25128805	FALSE	FALSE	FALSE	FALSE	FALSE	FALSE	FALSE	FALSE	4.42	1.28	0.0440496	4.88046e-05	0.0367439	4.2	1.06	0.0274892	0.00151223	0.0270092	TSS200;Body;Body	TRUE	Island	LOC284798
cg24988036	20	32260699	FALSE	FALSE	FALSE	FALSE	FALSE	FALSE	FALSE	FALSE	1.76	4.9	0.0158133	2.9581e-05	0.0297546	6.1	2.96	0.00220593	0.680134	0.848637	Body;Body	NA	N_Shore	NECAB3
cg06575425	20	34195484	FALSE	FALSE	FALSE	FALSE	FALSE	TRUE	FALSE	FALSE	2.22	5.36	0.0218106	3.02115e-05	0.0300439	1.36	4.5	0.0026026	0.919013	0.978921	TSS200	NA		FER1L4
cg14448104	20	43933556	FALSE	FALSE	FALSE	FALSE	FALSE	FALSE	FALSE	FALSE	4.58	1.44	0.0471596	1.08322e-05	0.0195843	3.74	0.6	0.0163362	0.213079	0.501841	Body;Body;Body	NA	N_Shore	MATN4
cg14759366	20	43945254	FALSE	FALSE	FALSE	FALSE	FALSE	FALSE	FALSE	FALSE	4.1	0.96	0.0289732	2.53606e-05	0.0285924	4.38	1.24	0.0230311	0.0201234	0.125648	Body	NA	Island	RBPJL
cg23214267	20	45523137	FALSE	FALSE	FALSE	FALSE	FALSE	FALSE	FALSE	FALSE	3.22	0.08	0.00702299	1.42258e-05	0.0217269	4.3	1.16	0.000616219	0.571592	0.79815	TSS200;TSS200	NA	N_Shore	EYA2
cg19911058	20	55904856	FALSE	FALSE	FALSE	FALSE	FALSE	FALSE	FALSE	FALSE	4.68	1.54	0.0425921	7.39062e-07	0.00517098	4.72	1.58	0.0168686	0.385868	0.674233	5'UTR;1stExon;1stExon;5'UTR	NA	Island	SPO11
cg02658437	20	61339804	FALSE	FALSE	FALSE	FALSE	FALSE	FALSE	FALSE	FALSE	1.16	4.3	0.00801722	3.46412e-05	0.0324356	0.96	4.1	0.00447962	0.439927	0.710285	TSS1500	TRUE	N_Shore	NTSR1
cg27416247	20	62820141	FALSE	FALSE	FALSE	FALSE	FALSE	FALSE	FALSE	FALSE	4.92	1.78	0.0209399	2.2145e-05	0.0268629	3.96	0.82	0.00747687	0.0915176	0.315357	5'UTR	TRUE	S_Shore	MYT1
cg08727867	21	15588349	FALSE	FALSE	FALSE	FALSE	FALSE	FALSE	FALSE	FALSE	4.46	1.32	0.0151335	2.96307e-05	0.0297546	4.36	1.2	0.00550201	0.17253	0.443153	TSS200	NA	N_Shore	RBM11
cg24168308	21	27372387	FALSE	FALSE	FALSE	FALSE	FALSE	FALSE	FALSE	FALSE	4.5	1.36	0.0343918	9.26563e-05	0.0482804	5.34	2.2	0.0112906	0.157142	0.426448	Body;Body;Body;Body;Body	NA		APP
cg11321156	21	27372396	FALSE	FALSE	FALSE	FALSE	FALSE	FALSE	FALSE	FALSE	4.56	1.42	0.0409972	2.60936e-05	0.0286497	5.9	2.76	0.0113794	0.129475	0.379222	Body;Body;Body;Body;Body	NA		APP
cg18274664	21	27372461	FALSE	FALSE	FALSE	FALSE	FALSE	FALSE	FALSE	FALSE	4.6	1.44	0.0455959	3.23812e-05	0.0314044	5.44	2.3	0.0107487	0.237473	0.531156	Body;Body;Body;Body;Body	NA		APP
cg14716686	21	30452862	FALSE	FALSE	FALSE	FALSE	FALSE	FALSE	FALSE	FALSE	4.44	1.3	0.0623945	5.25129e-05	0.0380319	0.2	3.34	0.0045779	0.966916	0.987996	TSS200	NA		C21orf7
cg01183122	21	35884348	FALSE	FALSE	FALSE	FALSE	FALSE	FALSE	FALSE	FALSE	1.92	5.06	0.0324174	6.91696e-05	0.0432933	5.22	2.08	0.00510873	0.798863	0.912538	TSS1500	TRUE		KCNE1
cg15616257	21	40823680	FALSE	FALSE	FALSE	FALSE	FALSE	FALSE	FALSE	FALSE	4.04	0.9	0.0125524	8.92124e-05	0.0476722	5.06	1.92	0.00395275	0.403649	0.687414	5'UTR;TSS200	TRUE		SH3BGR
cg14095850	21	45196584	FALSE	FALSE	FALSE	FALSE	FALSE	FALSE	FALSE	FALSE	1.72	4.88	0.0149385	9.67055e-05	0.0494655	2.04	5.18	0.000128871	0.741589	0.877658	TSS1500	NA	Island	CSTB
cg18501409	21	46553607	FALSE	FALSE	FALSE	FALSE	FALSE	FALSE	FALSE	FALSE	5.14	2	0.0096504	7.3007e-05	0.0435643	2.26	5.42	0.00110658	0.738327	0.877658	5'UTR;5'UTR;5'UTR;Body;Body;5'UTR;Body	NA	Island	ADARB1
cg03043822	22	25160098	FALSE	FALSE	FALSE	FALSE	FALSE	FALSE	FALSE	FALSE	4.44	1.3	0.0542926	6.47353e-05	0.0427265	3.94	0.8	0.0278641	0.0465248	0.204058	TSS1500;5'UTR	NA	Island	TOP1P2 PIWIL3
cg13627197	22	25160378	FALSE	FALSE	FALSE	FALSE	FALSE	FALSE	FALSE	FALSE	4.32	1.18	0.0412462	2.56292e-05	0.0285924	3.7	0.56	0.00592633	0.532189	0.775562	TSS200;5'UTR	NA	S_Shore	TOP1P2 PIWIL3
cg22897224	22	25160406	FALSE	FALSE	FALSE	FALSE	FALSE	FALSE	FALSE	FALSE	4.24	1.1	0.0432053	6.31261e-06	0.0153664	4.22	1.08	0.0157948	0.0553054	0.225928	TSS200;5'UTR	NA	S_Shore	TOP1P2 PIWIL3
cg08511772	22	37960426	FALSE	FALSE	FALSE	FALSE	FALSE	FALSE	FALSE	FALSE	1.46	4.6	0.0235341	7.11411e-05	0.0435371	4.62	1.48	0.0096604	0.174772	0.443568	5'UTR	NA	N_Shelf	CDC42EP1
cg12670943	22	43006541	FALSE	FALSE	FALSE	FALSE	FALSE	FALSE	FALSE	FALSE	6.18	3.04	0.0196323	1.26245e-06	0.00677598	2.1	5.24	0.00713492	0.241234	0.533914	Body;Body	NA	N_Shelf	POLDIP3
cg12727018	22	46436665	FALSE	FALSE	FALSE	FALSE	FALSE	FALSE	FALSE	FALSE	5.88	2.72	0.0417568	3.38786e-05	0.032063	2.86	6	0.00351556	0.936415	0.982232	Body	NA	N_Shelf	LOC100271722
cg07662964	22	50173998	FALSE	FALSE	FALSE	FALSE	FALSE	FALSE	FALSE	FALSE	1.86	5	0.0166293	3.5481e-05	0.0326123	2.64	5.78	0.00464954	0.704788	0.86466	Body;TSS200	TRUE	N_Shelf	BRD1 LOC90834
cg02247863	22	50983415	FALSE	FALSE	FALSE	FALSE	FALSE	FALSE	FALSE	FALSE	2.34	5.48	0.0307691	1.24563e-06	0.00677598	0.48	3.62	0.00712419	0.228764	0.52289		NA	N_Shore
cg12017894	22	50989632	FALSE	FALSE	FALSE	FALSE	FALSE	FALSE	FALSE	FALSE	2.12	5.26	0.0199372	2.88895e-05	0.0296372	3.54	0.4	0.00345611	0.619282	0.818757	3'UTR	NA	S_Shore	C22orf41

## Sheet: 1b
Seasonal amplitude tests
cohort	test.locus	control.locus	test.amplitude.median (%)	control.amplitude.median (%)	median.amplitude.difference (%)	wilcox.p*
ENID 2yr	SoC-associated CpGs MEs	random controls	7.30134	0.319747	6.9816	3.52835e-18
ENID 2yr	SoC-associated CpGs non-MEs	random controls	2.51974	0.319747	2.2	6.01464e-170
ENID 2yr	SoC-associated CpGs MEs	matched controls	7.30134	0.685277	6.61607	8.40211e-18
ENID 2yr	SoC-associated CpGs non-MEs	matched controls	2.51974	0.685277	1.83447	1.24779e-102
EMPHASIS	SoC-associated CpGs MEs	random controls	3.201	0.271816	2.92919	4.35798e-15
EMPHASIS	SoC-associated CpGs non-MEs	random controls	0.654757	0.271816	0.382941	1.17482e-32
EMPHASIS	SoC-associated CpGs MEs	matched controls	3.201	0.497307	2.7037	2.41055e-12
EMPHASIS	SoC-associated CpGs non-MEs	matched controls	0.654757	0.497307	0.15745	1.71438e-06
*Wilcoxon rank sum test; alternate hypothesis test.locus seasonal amplitude > control.locus seasonal amplitude
See Table 2 and Methods for details on selection of control loci

## Sheet: 1c
Inter-cohort change in SoC amplitude at ENID SoC-associated CpGs
test.locus	n loci	enid.median.amplitude (%)	emph.median.amplitude (%)	median.amplitude.change (%)	wilcox.p*
SoC-associated MEs	26	7.30134	3.201	4.10034	2.84426e-06
SoC-associated non-MEs	742	2.51974	0.654757	1.86499	1.49161e-77
random controls	768	0.319747	0.271816	0.0479307	0.0231633
matched controls	768	0.685277	0.497307	0.18797	2.01917e-08
*Wilcoxon rank sum test; alternate hypothesis test.locus seasonal amplitude in ENID (2yr) cohort > testl.locus seasonal amplitude in EMPHASIS (7-9yr) cohort
		742

## Sheet: 1d
SoC-CpGs (ENID SoC-associated loci with SoC methylation amplitude >=4%)
cpg	chr	loc	ME	ME.100bp	oo.gDMR	oo.blast.gDMR	oo.blast.plac.gDMR	sp.gDMR	sp.blast.gDMR	zink.PofOm	teh.gxe	enid.2yr.max.doc.theta	enid.2yr.min.doc.theta	enid.2yr.amplitude	enid.2yr.lrt.pval	enid.2yr.lrt.fdr	emph.max.doc.theta	emph.min.doc.theta	emph.amplitude	emph.lrt.pval	emph.lrt.fdr	enid.5-7yr.max.doc.theta	enid.5-7yr.amplitude	enid.5-7yr.fdr	UCSC_RefGene_Group	Enhancer	Relation_to_UCSC_CpG_Island	UCSC_RefGene_450k
cg04260676	1	1774322	FALSE	FALSE	FALSE	FALSE	FALSE	FALSE	FALSE	FALSE	FALSE	5.88	2.74	0.0430542	4.72947e-05	0.0363932	2.36	5.5	0.00754257	0.627986	0.823026	1.56	0.0111891	0.437125	5'UTR	TRUE	NA	GNB1
cg06155303	1	29460817	FALSE	FALSE	FALSE	FALSE	FALSE	FALSE	FALSE	FALSE	FALSE	4.82	1.68	0.0474991	9.12689e-06	0.0186252	4.36	1.2	0.0380874	0.169382	0.44016	4.9	0.0563193	0.0353335	NA	NA	Island	NA
cg09264065	1	29460936	FALSE	FALSE	FALSE	FALSE	FALSE	FALSE	FALSE	FALSE	FALSE	4.44	1.3	0.0512952	3.46862e-05	0.0324356	4.34	1.2	0.0225683	0.204062	0.486706	4.16	0.0596298	0.0100827	NA	NA	Island	NA
cg00107241	1	29461070	FALSE	FALSE	FALSE	FALSE	FALSE	FALSE	FALSE	FALSE	FALSE	4.7	1.56	0.0573867	2.16506e-05	0.0264268	4.22	1.08	0.0314917	0.0424695	0.195309	4.36	0.0425624	0.0188974	NA	NA	Island	NA
cg22875872	1	44031756	FALSE	FALSE	TRUE	TRUE	FALSE	FALSE	FALSE	FALSE	FALSE	3.78	0.62	0.0542973	4.50203e-05	0.0358528	5.08	1.94	0.0246804	0.0330059	0.165677	3.72	0.0990944	0.00474417	Body;Body	NA	Island	PTPRF
cg10881128	1	44031826	FALSE	FALSE	TRUE	TRUE	FALSE	FALSE	FALSE	FALSE	FALSE	3.54	0.4	0.0509765	9.17496e-08	0.00189204	4.96	1.82	0.0129332	0.342422	0.636631	3.82	0.0930464	0.01414	Body;Body	NA	Island	PTPRF
cg07173823	1	45190519	FALSE	FALSE	FALSE	FALSE	FALSE	FALSE	FALSE	FALSE	FALSE	6.24	3.1	0.0434333	6.55225e-05	0.0428215	5.18	2.04	0.0087478	0.438362	0.710285	1.84	0.0115931	0.423517	Body	NA	Island	C1orf228
cg13388692	1	86081680	FALSE	FALSE	FALSE	FALSE	FALSE	FALSE	FALSE	FALSE	FALSE	3.84	0.7	0.0689165	1.64048e-06	0.00765194	2.44	5.58	0.0188669	0.67643	0.848637	3.84	0.0536077	0.0221259	NA	NA	N_Shore	NA
cg24439713	1	86081713	FALSE	FALSE	FALSE	FALSE	FALSE	FALSE	FALSE	FALSE	FALSE	3.22	0.06	0.0412299	2.36319e-05	0.0279447	2.18	5.34	0.0113594	0.433142	0.710285	3.56	0.0402716	0.0204588	NA	NA	Island	NA
cg05708536	1	113285118	FALSE	TRUE	FALSE	FALSE	FALSE	FALSE	FALSE	FALSE	FALSE	4.1	0.96	0.0790268	2.59765e-05	0.0286497	4.54	1.4	0.0426808	0.00499639	0.0588849	3.94	0.0957274	0.00195443	NA	NA	N_Shore	NA
cg25707805	1	113285387	FALSE	TRUE	FALSE	FALSE	FALSE	FALSE	FALSE	FALSE	FALSE	4.14	1	0.0633589	1.19033e-06	0.00675922	4.6	1.46	0.0372515	0.0186015	0.119049	4.02	0.0756106	0.00253755	NA	NA	N_Shore	NA
cg08111158	1	227746191	FALSE	FALSE	FALSE	FALSE	FALSE	FALSE	FALSE	FALSE	FALSE	4.58	1.44	0.0528012	2.5635e-05	0.0285924	4.16	1.02	0.0147399	0.334527	0.635046	4.9	0.0496922	0.00818639	NA	NA	Island	NA
cg14789818	1	227748712	FALSE	FALSE	FALSE	FALSE	FALSE	FALSE	FALSE	FALSE	FALSE	4.32	1.18	0.0630337	4.96594e-05	0.0369208	4.66	1.52	0.0305144	0.0284689	0.155065	4.4	0.0968913	0.00748529	NA	NA	Island	NA
cg15309953	2	5813258	FALSE	FALSE	FALSE	FALSE	FALSE	FALSE	FALSE	FALSE	FALSE	4.66	1.52	0.056498	1.35496e-05	0.0213111	5.2	2.04	0.0197432	0.259506	0.561411	4.66	0.0440643	0.0314824	NA	NA	N_Shore	NA
cg11241151	2	11123476	FALSE	FALSE	FALSE	FALSE	FALSE	FALSE	FALSE	FALSE	FALSE	3.86	0.7	0.0424551	7.5594e-05	0.0441734	4.58	1.44	0.0133458	0.264513	0.570636	4.74	0.0277271	0.115874	NA	TRUE	NA	NA
cg03257743	2	11123616	FALSE	FALSE	FALSE	FALSE	FALSE	FALSE	FALSE	FALSE	FALSE	4.06	0.92	0.0605616	1.74147e-05	0.0232873	4.08	0.94	0.0235125	0.106573	0.348289	3.96	0.0492421	0.00748529	NA	TRUE	NA	NA
cg18587476	2	24397810	FALSE	FALSE	FALSE	FALSE	FALSE	FALSE	FALSE	FALSE	FALSE	4.26	1.12	0.0597873	4.42301e-05	0.0355851	4.44	1.3	0.0287748	0.0011968	0.0248417	3.82	0.0609333	0.0110316	TSS200	NA	Island	C2orf84
cg10067510	2	48844971	FALSE	TRUE	FALSE	FALSE	FALSE	FALSE	FALSE	FALSE	TRUE	4.46	1.32	0.0458659	9.40061e-05	0.048619	4.88	1.74	0.0381954	6.08699e-05	0.0031549	3.54	0.0615804	0.334657	1stExon;Body;5'UTR;5'UTR;1stExon	NA	Island	GTF2A1L STON1-GTF2A1L
cg24516106	2	72079413	FALSE	FALSE	FALSE	FALSE	FALSE	FALSE	FALSE	FALSE	FALSE	3.88	0.74	0.0803876	8.22237e-07	0.00520639	3.6	0.46	0.0239145	0.408341	0.690762	3.92	0.0775316	0.00538657	NA	NA	Island	NA
cg09467436	2	72079424	FALSE	FALSE	FALSE	FALSE	FALSE	FALSE	FALSE	FALSE	FALSE	3.92	0.78	0.0576946	4.90898e-07	0.00427624	3.9	0.74	0.0274525	0.290982	0.599059	3.88	0.0699774	0.00340435	NA	NA	Island	NA
cg25705148	2	72079498	FALSE	FALSE	FALSE	FALSE	FALSE	FALSE	FALSE	FALSE	FALSE	3.84	0.7	0.064414	1.44085e-06	0.00698165	3.8	0.66	0.0294282	0.0316114	0.162936	3.88	0.0831168	0.00072718	NA	NA	Island	NA
cg01361021	2	72079609	FALSE	FALSE	FALSE	FALSE	FALSE	FALSE	FALSE	FALSE	FALSE	3.9	0.76	0.0497816	1.4463e-05	0.0217269	3.74	0.6	0.0178786	0.18691	0.461565	3.94	0.0704216	0.000844462	NA	NA	Island	NA
cg25800500	2	97505275	FALSE	FALSE	TRUE	TRUE	FALSE	FALSE	FALSE	FALSE	FALSE	4.12	0.98	0.101899	1.79336e-06	0.00802785	4.02	0.88	0.0461919	0.174135	0.443568	3.96	0.144087	0.00662366	3'UTR	NA	Island	ANKRD23
cg19651219	2	115419729	TRUE	TRUE	FALSE	FALSE	FALSE	FALSE	FALSE	FALSE	FALSE	4.36	1.22	0.042894	5.18118e-05	0.0378122	4.44	1.3	0.0558213	6.16191e-05	0.0031549	4.92	0.0226925	0.314928	Body	TRUE	Island	DPP10
cg21470541	2	120976896	FALSE	FALSE	FALSE	FALSE	FALSE	TRUE	FALSE	FALSE	FALSE	6.1	2.96	0.0447593	9.21646e-07	0.00564241	4.76	1.62	0.009211	0.978385	0.992304	1.22	0.0250623	0.149543	NA	NA	N_Shelf	NA
cg04752871	2	121412432	FALSE	FALSE	FALSE	FALSE	FALSE	FALSE	FALSE	FALSE	FALSE	4.44	1.3	0.0450047	2.89108e-05	0.0296372	4.82	1.68	0.01794	0.183281	0.454064	4.16	0.0831106	0.000345313	NA	TRUE	S_Shore	NA
cg21790715	2	121776314	FALSE	FALSE	FALSE	FALSE	FALSE	FALSE	FALSE	FALSE	FALSE	4.5	1.36	0.0626347	7.19961e-07	0.00517098	4.1	0.96	0.0270196	0.113396	0.356523	4.1	0.0654828	0.000345313	NA	TRUE	NA	NA
cg05403241	2	121776604	FALSE	FALSE	FALSE	FALSE	FALSE	FALSE	FALSE	FALSE	FALSE	4.44	1.3	0.0627994	6.18819e-06	0.0153664	3.7	0.56	0.0219253	0.071495	0.266545	3.96	0.0605084	0.0045129	NA	TRUE	NA	NA
cg09015973	2	131673771	FALSE	FALSE	FALSE	FALSE	FALSE	FALSE	FALSE	FALSE	FALSE	4.12	0.98	0.0773382	1.18315e-05	0.0201837	4.28	1.14	0.0264263	0.18878	0.463205	4.02	0.0628578	0.0831158	TSS1500;TSS1500	NA	Island	ARHGEF4
cg00401745	2	131673963	FALSE	FALSE	FALSE	FALSE	FALSE	FALSE	FALSE	FALSE	FALSE	4.24	1.1	0.0417858	4.36987e-05	0.0353026	4.24	1.1	0.039182	0.0198426	0.124911	3.74	0.0555166	0.0222938	TSS1500;TSS1500	NA	Island	ARHGEF4
cg00028678	2	131674175	FALSE	FALSE	FALSE	FALSE	FALSE	FALSE	FALSE	FALSE	FALSE	4.22	1.08	0.0509997	6.44702e-06	0.0154026	4.34	1.2	0.0283073	0.053153	0.219471	3.7	0.0425462	0.054	TSS200;TSS200	NA	S_Shore	ARHGEF4
cg07755203	2	150177004	FALSE	TRUE	FALSE	FALSE	FALSE	FALSE	FALSE	FALSE	FALSE	4.32	1.18	0.0490045	4.90473e-05	0.0367439	4.4	1.26	0.0369144	0.00116034	0.0247539	3.74	0.0417747	0.016668	NA	NA	Island	NA
cg15602054	2	170624685	FALSE	TRUE	FALSE	FALSE	FALSE	FALSE	FALSE	FALSE	FALSE	4.42	1.28	0.0594697	1.28676e-05	0.0209199	3.88	0.74	0.0205347	0.23636	0.531156	4.08	0.0586641	0.00892526	NA	TRUE	Island	NA
cg17598339	2	170624727	TRUE	TRUE	FALSE	FALSE	FALSE	FALSE	FALSE	FALSE	FALSE	4.42	1.28	0.0741697	3.34708e-05	0.0318309	4.4	1.26	0.0147211	0.433875	0.710285	4.12	0.0459063	0.143716	NA	TRUE	Island	NA
cg04362989	2	170625479	FALSE	TRUE	FALSE	FALSE	FALSE	FALSE	FALSE	FALSE	FALSE	4.3	1.16	0.0618706	1.22931e-06	0.00677598	4.38	1.24	0.0346628	0.00724734	0.0701481	4.52	0.0589038	0.00538657	NA	NA	Island	NA
cg05868531	2	232348602	FALSE	FALSE	FALSE	FALSE	FALSE	FALSE	FALSE	FALSE	FALSE	4.42	1.28	0.0564876	6.6556e-06	0.0155224	4.64	1.5	0.0243372	0.115988	0.356523	3.76	0.0598663	0.00926238	NA	TRUE	Island	NA
cg15371801	2	232348684	FALSE	FALSE	FALSE	FALSE	FALSE	FALSE	FALSE	FALSE	FALSE	4.42	1.28	0.0481728	3.80675e-05	0.0333678	4.66	1.52	0.0249042	0.0291617	0.15772	3.62	0.0571781	0.0141089	NA	TRUE	Island	NA
cg11559198	2	232348794	FALSE	FALSE	FALSE	FALSE	FALSE	FALSE	FALSE	FALSE	FALSE	4.36	1.22	0.0628782	1.43537e-05	0.0217269	4.62	1.48	0.0334836	0.0363514	0.173403	3.84	0.0498556	0.0498115	NA	NA	Island	NA
cg22403782	2	233246136	FALSE	FALSE	FALSE	FALSE	FALSE	FALSE	FALSE	FALSE	FALSE	4.36	1.22	0.041018	1.57662e-05	0.022382	4.34	1.2	0.0234216	0.121821	0.365615	4.18	0.0349029	0.0570654	Body	NA	Island	ALPP
cg12307638	2	233323532	FALSE	FALSE	FALSE	FALSE	FALSE	FALSE	FALSE	FALSE	FALSE	4.44	1.3	0.0498567	5.41246e-07	0.00441808	3.6	0.46	0.00538558	0.748668	0.883222	4.2	0.0456924	0.00748529	Body	NA	Island	ALPI
cg26181818	2	233323935	FALSE	FALSE	FALSE	FALSE	FALSE	FALSE	FALSE	FALSE	FALSE	3.78	0.62	0.0556149	6.53015e-05	0.0428215	3.74	0.6	0.0157513	0.443092	0.710285	3.44	0.0652496	0.0265569	3'UTR	NA	Island	ALPI
cg23650279	2	239072961	FALSE	FALSE	TRUE	TRUE	TRUE	FALSE	FALSE	FALSE	FALSE	4.06	0.92	0.0489854	2.11278e-06	0.00890124	3.66	0.52	0.0134424	0.138651	0.393601	3.26	0.0273125	0.307368	NA	NA	Island	NA
cg25789721	3	10370264	FALSE	FALSE	FALSE	FALSE	FALSE	FALSE	FALSE	FALSE	FALSE	4.96	1.82	0.0543726	4.25745e-05	0.0350538	4.76	1.6	0.0168683	0.163505	0.434463	4.64	0.0326766	0.0283821	3'UTR;3'UTR	NA	N_Shore	ATP2B2
cg16468843	3	10370624	FALSE	FALSE	FALSE	FALSE	FALSE	FALSE	FALSE	FALSE	FALSE	5.16	2.02	0.050978	5.01235e-05	0.037125	4.68	1.54	0.00893221	0.339284	0.635951	4.66	0.0148741	0.437666	Body;Body	NA	Island	ATP2B2
cg19764594	3	10806288	FALSE	TRUE	FALSE	FALSE	FALSE	FALSE	FALSE	FALSE	FALSE	4.46	1.32	0.0430219	2.03656e-05	0.0258237	2.8	5.94	0.0250082	0.11276	0.356523	4.74	0.0554212	0.00106774	TSS1500	NA	NA	LOC285370
cg24148085	3	72704603	FALSE	FALSE	FALSE	FALSE	FALSE	FALSE	FALSE	FALSE	FALSE	4.56	1.42	0.0431215	2.90688e-06	0.0112768	4.14	1	0.0229228	0.00800717	0.0719894	4.08	0.0328348	0.0603077	NA	TRUE	Island	NA
cg17057719	3	72704701	FALSE	FALSE	FALSE	FALSE	FALSE	FALSE	FALSE	FALSE	FALSE	4.34	1.2	0.0682779	1.20835e-06	0.00676356	4.46	1.32	0.0194871	0.25851	0.560835	4.16	0.0364499	0.211943	NA	TRUE	S_Shore	NA
cg00186462	3	100401284	TRUE	TRUE	FALSE	FALSE	FALSE	FALSE	FALSE	FALSE	FALSE	4.54	1.4	0.0500066	3.26101e-05	0.0315484	4.52	1.38	0.0707461	0.00151175	0.0270092	3.7	0.0706223	0.0329958	Body	NA	NA	GPR128
cg21448444	3	128765558	FALSE	FALSE	FALSE	FALSE	FALSE	FALSE	FALSE	FALSE	FALSE	4.74	1.6	0.0448551	4.24829e-05	0.0350538	0.64	3.8	0.00663706	0.308048	0.616061	5.08	0.0256427	0.0747143	NA	NA	Island	NA
cg03290530	3	137361526	FALSE	FALSE	FALSE	FALSE	FALSE	FALSE	FALSE	FALSE	FALSE	4.76	1.62	0.051162	2.50166e-05	0.0285924	4.8	1.66	0.0451926	0.0497807	0.211224	4.66	0.077767	0.0461314	NA	TRUE	NA	NA
cg12987312	3	142666108	FALSE	TRUE	FALSE	FALSE	FALSE	FALSE	FALSE	FALSE	FALSE	4.14	1	0.0517618	1.37065e-05	0.0213111	4.22	1.08	0.0340459	0.000527745	0.0138713	3.72	0.0437562	0.0315009	NA	NA	N_Shore	NA
cg25620760	3	170202937	FALSE	FALSE	FALSE	FALSE	FALSE	FALSE	FALSE	FALSE	FALSE	5.04	1.9	0.0531952	1.23253e-05	0.0204629	3.7	0.56	0.0198784	0.0941754	0.320536	3.12	0.0139309	0.698078	Body	TRUE	NA	SLC7A14
cg15367212	3	180588198	FALSE	FALSE	FALSE	FALSE	FALSE	FALSE	FALSE	FALSE	FALSE	4.8	1.66	0.0421074	1.74737e-05	0.0232873	3.82	0.68	0.0160116	0.129864	0.379222	4.58	0.0314999	0.026599	NA	TRUE	NA	NA
cg07120369	3	187388281	FALSE	FALSE	FALSE	FALSE	FALSE	FALSE	FALSE	FALSE	FALSE	4.46	1.32	0.0509117	7.92132e-05	0.0451423	6.04	2.9	0.00143994	0.789045	0.912538	4.38	0.0439644	0.00796414	TSS200	TRUE	S_Shore	SST
cg18063486	4	1512966	FALSE	TRUE	FALSE	FALSE	FALSE	FALSE	FALSE	FALSE	FALSE	4.58	1.44	0.0419423	3.41305e-05	0.0322236	5.6	2.46	0.0100947	0.230665	0.52567	4.32	0.0268674	0.0258996	NA	NA	N_Shore	NA
cg25034424	4	1513089	TRUE	TRUE	FALSE	FALSE	FALSE	FALSE	FALSE	FALSE	FALSE	4.68	1.54	0.0917402	4.69383e-05	0.0362029	5.68	2.54	0.00891807	0.157715	0.426497	4.44	0.011993	0.0165788	NA	NA	N_Shore	NA
cg09366730	4	2341370	FALSE	FALSE	FALSE	FALSE	FALSE	FALSE	FALSE	FALSE	FALSE	3.84	0.7	0.072559	1.70143e-07	0.00229878	3.08	6.22	0.028253	0.248655	0.545619	3.66	0.0625788	0.00796414	Body	NA	Island	ZFYVE28
cg15600051	4	2341440	FALSE	FALSE	FALSE	FALSE	FALSE	FALSE	FALSE	FALSE	FALSE	3.64	0.5	0.0526092	3.77572e-07	0.00369845	3.66	0.52	0.0154232	0.617544	0.818757	3.92	0.0395555	0.0315009	Body	NA	Island	ZFYVE28
cg10766585	4	24801110	FALSE	FALSE	FALSE	FALSE	FALSE	FALSE	FALSE	FALSE	FALSE	4.3	1.16	0.0485867	5.80793e-07	0.00455126	4.02	0.88	0.0193355	0.0357713	0.172782	4.36	0.0426537	0.0214332	5'UTR	NA	Island	SOD3
cg26986681	4	58060609	FALSE	FALSE	FALSE	FALSE	FALSE	FALSE	FALSE	FALSE	FALSE	4.64	1.5	0.106101	3.32395e-06	0.0116283	4.92	1.76	0.0390562	0.119758	0.364976	4	0.135102	0.00961942	NA	NA	N_Shore	NA
cg17932096	4	58060773	FALSE	FALSE	FALSE	FALSE	FALSE	FALSE	FALSE	FALSE	FALSE	4.62	1.48	0.0832857	3.76668e-06	0.012197	4.9	1.76	0.0362464	0.0437719	0.197967	4.04	0.107211	0.0045582	NA	NA	N_Shore	NA
cg04742556	4	58061991	FALSE	FALSE	FALSE	FALSE	FALSE	FALSE	FALSE	FALSE	FALSE	4.56	1.4	0.0669491	1.80303e-06	0.00802785	5.28	2.14	0.0302209	0.0123521	0.0912155	4.1	0.0637632	0.0101691	NA	NA	Island	NA
cg10868445	4	147163613	FALSE	FALSE	FALSE	FALSE	FALSE	FALSE	FALSE	FALSE	FALSE	4.88	1.72	0.0469121	8.44531e-05	0.0463444	0.14	3.28	0.0117061	0.594217	0.801786	4.68	0.0435727	0.00818639	NA	TRUE	NA	NA
cg06802630	5	322735	FALSE	FALSE	FALSE	FALSE	FALSE	FALSE	FALSE	FALSE	FALSE	4.24	1.1	0.0580361	4.55022e-05	0.0359771	3.82	0.66	0.00251962	0.92954	0.982232	4.02	0.0677924	0.0045129	Body	NA	Island	AHRR
cg23516451	5	38845028	FALSE	FALSE	FALSE	FALSE	FALSE	FALSE	FALSE	FALSE	FALSE	4.24	1.1	0.0514298	7.59949e-11	2.97759e-05	4.18	1.04	0.0210995	0.0133397	0.0962799	5.08	0.00945029	0.930667	TSS1500;TSS1500	NA	N_Shore	OSMR
cg27295642	5	74952444	FALSE	FALSE	FALSE	FALSE	FALSE	FALSE	FALSE	FALSE	FALSE	3.94	0.8	0.0474195	1.34099e-06	0.00698165	4.22	1.08	0.0171425	0.206271	0.490076	4	0.0316099	0.0237324	NA	TRUE	NA	NA
cg03400060	5	78365801	FALSE	FALSE	FALSE	FALSE	FALSE	FALSE	FALSE	FALSE	FALSE	3.68	0.54	0.0530044	5.21011e-05	0.0379441	2.96	6.1	0.0226427	0.133487	0.385407	3.18	0.0874224	0.0045129	Body;TSS1500	TRUE	S_Shore	BHMT2 DMGDH
cg01902605	5	78366076	FALSE	FALSE	FALSE	FALSE	FALSE	FALSE	FALSE	FALSE	FALSE	3.8	0.66	0.0510169	6.68323e-05	0.0428911	4.2	1.06	0.00430474	0.58274	0.801786	3.54	0.0362382	0.0306047	Body;TSS1500	TRUE	S_Shore	BHMT2 DMGDH
cg06660015	5	139743303	FALSE	FALSE	FALSE	FALSE	FALSE	FALSE	FALSE	FALSE	FALSE	3.98	0.84	0.0422599	4.2015e-05	0.0350257	2.68	5.82	0.00938818	0.423441	0.706963	4.38	0.0410731	0.0145113	Body	TRUE	S_Shore	SLC4A9
cg08414643	5	153873149	FALSE	FALSE	FALSE	FALSE	FALSE	FALSE	FALSE	FALSE	FALSE	4.46	1.3	0.0535283	3.87688e-05	0.0336811	3.74	0.6	0.0267353	0.0689023	0.263212	4.76	0.0415046	0.0747143	NA	NA	Island	NA
cg10669219	5	173739399	FALSE	FALSE	TRUE	TRUE	FALSE	FALSE	FALSE	FALSE	FALSE	3.88	0.74	0.0513627	6.69775e-05	0.0428911	4.74	1.6	0.0239552	0.0960283	0.323464	4.16	0.0370864	0.0578957	NA	TRUE	Island	NA
cg11518839	5	176216711	FALSE	FALSE	FALSE	FALSE	FALSE	TRUE	FALSE	FALSE	FALSE	5.06	1.92	0.0405594	1.01699e-05	0.0192748	4.42	1.26	0.0180327	0.00734995	0.0701481	4.94	0.0337446	0.0159902	NA	NA	NA	NA
cg15068079	5	180479586	FALSE	FALSE	FALSE	FALSE	FALSE	FALSE	FALSE	FALSE	FALSE	4.22	1.06	0.0443531	8.98053e-05	0.0478735	3.1	6.24	0.0161658	0.0692302	0.263212	5.28	0.0194582	0.140759	Body	NA	Island	BTNL9
cg17619020	6	3248098	FALSE	FALSE	FALSE	FALSE	FALSE	FALSE	FALSE	FALSE	FALSE	3.82	0.68	0.0441662	6.11961e-05	0.0416402	5.14	2	0.0170586	0.0356732	0.172782	3.96	0.0408609	0.0351494	NA	TRUE	NA	NA
cg01401534	6	4079342	FALSE	FALSE	FALSE	FALSE	FALSE	FALSE	FALSE	FALSE	FALSE	4.14	1	0.0726763	1.19563e-08	0.000745234	4.62	1.48	0.0267081	0.00806131	0.0719894	4.18	0.0403709	0.0493133	TSS200;5'UTR;1stExon	TRUE	Island	C6orf201 C6orf146
cg10424681	6	4079350	FALSE	FALSE	FALSE	FALSE	FALSE	FALSE	FALSE	FALSE	FALSE	4.3	1.16	0.0744266	1.59247e-08	0.000745234	4.68	1.54	0.0257789	0.0524695	0.219003	3.88	0.0419058	0.0890039	TSS200;5'UTR;1stExon	TRUE	Island	C6orf201 C6orf146
cg15796980	6	13860443	FALSE	FALSE	FALSE	FALSE	FALSE	FALSE	FALSE	FALSE	FALSE	4.28	1.14	0.0441174	1.93797e-06	0.00825351	4.18	1.04	0.0222364	0.00793579	0.0719894	3.72	0.0136506	0.522655	NA	NA	NA	NA
cg15379240	6	26592423	FALSE	FALSE	FALSE	FALSE	FALSE	FALSE	FALSE	FALSE	FALSE	5.46	2.32	0.0432003	7.87863e-05	0.045065	2.06	5.2	0.011435	0.522783	0.769152	5.4	0.031412	0.0783644	NA	NA	N_Shelf	NA
cg04626491	6	28584053	FALSE	FALSE	FALSE	FALSE	FALSE	FALSE	FALSE	FALSE	FALSE	4.64	1.5	0.043533	1.95702e-07	0.00247351	4.38	1.24	0.0322411	7.10809e-05	0.00341188	4.24	0.0485572	0.00587184	NA	NA	Island	NA
cg20839206	6	28584121	FALSE	FALSE	FALSE	FALSE	FALSE	FALSE	FALSE	FALSE	FALSE	4.36	1.22	0.0535328	2.35189e-07	0.0028797	4.64	1.48	0.0238215	0.0172638	0.112361	4.72	0.0256222	0.0923204	NA	NA	Island	NA
cg22121557	6	28584138	FALSE	FALSE	FALSE	FALSE	FALSE	FALSE	FALSE	FALSE	FALSE	4.44	1.3	0.0430976	1.64012e-05	0.022788	4.64	1.5	0.0389072	0.0146931	0.102584	4.4	0.0364725	0.00961942	NA	NA	Island	NA
cg10582827	6	28584464	FALSE	FALSE	FALSE	FALSE	FALSE	FALSE	FALSE	FALSE	FALSE	4.68	1.54	0.0550893	4.76495e-05	0.0363932	4.12	0.98	0.0302119	0.00583574	0.0640264	4.16	0.0377118	0.0993378	NA	NA	S_Shore	NA
cg26668675	6	31148463	TRUE	TRUE	FALSE	FALSE	FALSE	FALSE	FALSE	FALSE	FALSE	4.48	1.34	0.119618	2.83415e-05	0.0296372	5.1	1.96	0.0536825	0.0572161	0.227963	4	0.0491671	0.542184	NA	NA	Island	NA
cg03078486	6	31148474	TRUE	TRUE	FALSE	FALSE	FALSE	FALSE	FALSE	FALSE	FALSE	4.5	1.36	0.0920251	6.8419e-05	0.0431613	5.16	2.02	0.0297113	0.269678	0.574174	4.24	0.0455672	0.464574	NA	NA	Island	NA
cg26818629	6	31148516	TRUE	TRUE	FALSE	FALSE	FALSE	FALSE	FALSE	FALSE	FALSE	4.5	1.36	0.0696757	8.32141e-05	0.0463285	4.92	1.78	0.019538	0.270111	0.574174	4.02	0.0244193	0.46894	NA	NA	Island	NA
cg09357589	6	31148552	TRUE	TRUE	FALSE	FALSE	FALSE	FALSE	FALSE	FALSE	FALSE	4.5	1.36	0.083034	5.65433e-05	0.0398462	4.94	1.8	0.0299333	0.187764	0.462188	3.84	0.033337	0.53384	NA	NA	Island	NA
cg11811828	6	31148666	TRUE	TRUE	FALSE	FALSE	FALSE	FALSE	FALSE	FALSE	FALSE	4.46	1.32	0.105735	8.92794e-05	0.0476722	4.8	1.66	0.0404093	0.163514	0.434463	4.08	0.0424492	0.555165	NA	NA	S_Shore	NA
cg21370522	6	31543219	FALSE	FALSE	FALSE	FALSE	FALSE	TRUE	FALSE	FALSE	FALSE	5.9	2.76	0.0449786	6.98868e-05	0.0434055	2.18	5.32	0.0175586	0.382112	0.674233	5.84	0.00496947	0.896921	TSS200	NA	NA	TNF
cg26063721	6	34499488	FALSE	TRUE	FALSE	FALSE	FALSE	FALSE	FALSE	FALSE	FALSE	4.64	1.5	0.0450423	7.29738e-05	0.0435643	5.22	2.08	0.0243312	0.159935	0.430982	4.22	0.0530753	0.0277981	Body	NA	Island	PACSIN1
cg07912161	6	36929838	FALSE	TRUE	FALSE	FALSE	FALSE	FALSE	FALSE	FALSE	FALSE	4.36	1.22	0.0516063	3.68029e-05	0.0328472	4.78	1.62	0.00478229	0.728231	0.876279	4.44	0.0298314	0.145145	Body	NA	Island	PI16
cg23737190	6	36930021	TRUE	TRUE	FALSE	FALSE	FALSE	FALSE	FALSE	FALSE	FALSE	4.38	1.24	0.0931085	2.06093e-05	0.0259646	6.04	2.9	0.00841256	0.967412	0.987996	4.3	0.0382632	0.41886	Body	NA	Island	PI16
cg24661236	6	36930062	FALSE	TRUE	FALSE	FALSE	FALSE	FALSE	FALSE	FALSE	FALSE	4.48	1.34	0.104879	8.48675e-05	0.0465067	1.72	4.86	0.007121	0.963559	0.987996	4.44	0.0412164	0.334412	Body	NA	Island	PI16
cg15414745	6	74064047	FALSE	TRUE	FALSE	FALSE	FALSE	FALSE	FALSE	FALSE	FALSE	4.52	1.38	0.0714056	3.93233e-06	0.0125264	4.28	1.14	0.00655589	0.627244	0.823026	4.32	0.065008	0.00538657	TSS200	NA	Island	DPPA5
cg23414861	6	74064064	TRUE	TRUE	FALSE	FALSE	FALSE	FALSE	FALSE	FALSE	FALSE	4.44	1.3	0.0719055	2.82591e-08	0.000851716	4.36	1.22	0.0239761	0.0829713	0.295009	4.04	0.0691079	0.0129309	TSS200	NA	Island	DPPA5
cg02931604	6	74064298	TRUE	TRUE	FALSE	FALSE	FALSE	FALSE	FALSE	FALSE	FALSE	4.46	1.32	0.0634483	4.08322e-06	0.0127989	4.76	1.62	0.0365529	0.0108321	0.0807674	4.02	0.0734896	0.00818639	TSS1500	NA	Island	DPPA5
cg12045875	6	74104594	FALSE	TRUE	FALSE	FALSE	FALSE	FALSE	FALSE	FALSE	FALSE	4.64	1.5	0.0544639	3.08672e-05	0.0303137	4.58	1.44	0.0152564	0.0789304	0.285937	4.44	0.113177	0.0306047	1stExon;5'UTR	NA	Island	DDX43
cg16143502	6	74104801	FALSE	TRUE	FALSE	FALSE	FALSE	FALSE	FALSE	FALSE	FALSE	4.44	1.3	0.0530449	7.86168e-05	0.0450339	4.1	0.96	0.0109157	0.477565	0.736485	4.54	0.0415643	0.115874	1stExon	NA	Island	DDX43
cg12024822	6	90597394	FALSE	FALSE	FALSE	FALSE	FALSE	FALSE	FALSE	FALSE	FALSE	4.34	1.2	0.0413085	6.67796e-05	0.0428911	4.74	1.6	0.0236371	0.00552018	0.0623456	3.66	0.0441025	0.0421641	NA	NA	Island	NA
cg25608547	6	129251071	FALSE	FALSE	TRUE	TRUE	TRUE	FALSE	FALSE	FALSE	FALSE	4.38	1.24	0.0453231	1.24607e-07	0.00195292	4.1	0.96	0.0136908	0.161044	0.432455	3.6	0.0225792	0.259885	Body;Body	NA	N_Shore	LAMA2
cg02042585	6	160783785	FALSE	FALSE	FALSE	FALSE	FALSE	FALSE	FALSE	FALSE	FALSE	4.08	0.94	0.0627896	9.21685e-05	0.0481505	3.54	0.4	0.0329032	0.0571165	0.227963	3.76	0.0443626	0.0237324	Body	NA	Island	SLC22A3
cg09428340	6	163570371	FALSE	FALSE	FALSE	FALSE	FALSE	FALSE	FALSE	FALSE	FALSE	4.38	1.24	0.107404	3.57209e-05	0.0326123	3.44	0.3	0.0236545	0.111995	0.356523	2.9	0.0202159	0.762846	Body;Body;Body	NA	Island	PACRG
cg00056541	6	164288623	FALSE	FALSE	FALSE	FALSE	FALSE	FALSE	FALSE	FALSE	FALSE	4.72	1.58	0.0636513	2.03551e-05	0.0258237	4.08	0.94	0.0132833	0.40982	0.69174	4	0.0196981	0.572799	NA	TRUE	NA	NA
cg24757553	7	27127501	FALSE	FALSE	FALSE	FALSE	FALSE	FALSE	FALSE	FALSE	FALSE	4.54	1.38	0.0438912	1.33644e-05	0.0213111	5.02	1.88	0.0300553	0.000541848	0.0138713	4.32	0.0492587	0.00748529	NA	NA	Island	NA
cg15181598	7	38350921	FALSE	FALSE	FALSE	FALSE	FALSE	FALSE	FALSE	FALSE	FALSE	4.42	1.28	0.0525665	9.78237e-06	0.0190448	4.5	1.34	0.0578032	0.0106793	0.0807674	4	0.0676621	0.00258954	NA	TRUE	Island	NA
cg06132400	7	38350938	FALSE	FALSE	FALSE	FALSE	FALSE	FALSE	FALSE	FALSE	FALSE	4.34	1.2	0.0838854	1.42817e-06	0.00698165	4.6	1.46	0.0499189	0.0189531	0.120297	3.86	0.111594	0.00748529	NA	TRUE	Island	NA
cg25335841	7	38351094	FALSE	FALSE	FALSE	FALSE	FALSE	FALSE	FALSE	FALSE	TRUE	4.32	1.18	0.0682803	4.3119e-05	0.0351263	4.54	1.4	0.0637029	0.0362263	0.173403	4.26	0.0311003	0.0520847	NA	TRUE	Island	NA
cg00739278	7	38351226	FALSE	FALSE	FALSE	FALSE	FALSE	FALSE	FALSE	FALSE	FALSE	4.42	1.28	0.0442998	7.46505e-06	0.0166091	4.76	1.62	0.0347059	0.0351117	0.171757	4.26	0.0416245	0.0788421	NA	NA	Island	NA
cg05425699	7	47580148	FALSE	FALSE	FALSE	FALSE	FALSE	TRUE	FALSE	FALSE	FALSE	5.74	2.6	0.125592	1.10132e-05	0.0197037	5.1	1.96	0.0326426	0.941405	0.982232	5.7	0.0818738	0.0928193	TSS1500	NA	S_Shelf	TNS3
cg01567825	7	111368651	FALSE	FALSE	FALSE	FALSE	FALSE	FALSE	FALSE	FALSE	FALSE	4.3	1.16	0.0401674	1.05488e-05	0.0195843	4.4	1.26	0.0592998	0.000499878	0.0137109	3.92	0.035407	0.058222	Body	NA	Island	DOCK4
cg27576576	7	156786077	FALSE	FALSE	FALSE	FALSE	FALSE	FALSE	FALSE	FALSE	FALSE	4	0.86	0.0448444	2.15368e-05	0.0263701	4.18	1.04	0.015571	0.0990103	0.330608	4.2	0.0404345	0.0145581	NA	NA	NA	NA
cg10401362	7	157185402	FALSE	FALSE	FALSE	FALSE	FALSE	FALSE	FALSE	FALSE	FALSE	5.98	2.84	0.0418354	2.79287e-07	0.00312654	3.34	0.2	0.00792734	0.214588	0.50245	2.4	0.021361	0.091079	Body	NA	NA	DNAJB6
cg03454775	8	2012595	FALSE	FALSE	FALSE	FALSE	FALSE	FALSE	FALSE	FALSE	FALSE	4.52	1.38	0.0761041	1.99912e-05	0.0255975	3.9	0.76	0.00748599	0.558153	0.793964	4.12	0.0548064	0.0314824	Body	NA	NA	MYOM2
cg22381154	8	2212328	FALSE	FALSE	FALSE	FALSE	FALSE	FALSE	FALSE	FALSE	FALSE	4.38	1.24	0.0458171	4.15488e-05	0.0348934	0.52	3.66	0.00365406	0.513422	0.764163	4.7	0.0709165	0.0242892	NA	NA	NA	NA
cg27650870	8	41583136	FALSE	FALSE	FALSE	FALSE	FALSE	FALSE	FALSE	FALSE	FALSE	4.08	0.94	0.0400583	1.53392e-07	0.00229878	0.62	3.76	0.00336319	0.788215	0.912538	4.18	0.0534491	0.00152154	Body;Body;Body;Body;Body	NA	Island	ANK1
cg19537719	8	41583498	FALSE	FALSE	FALSE	FALSE	FALSE	FALSE	FALSE	FALSE	FALSE	4.18	1.02	0.0977494	4.42812e-06	0.0132512	3.28	0.14	0.0178037	0.445251	0.710921	3.92	0.0539145	0.300001	Body;Body;Body;Body;Body	NA	Island	ANK1
cg18614735	8	41583523	FALSE	FALSE	FALSE	FALSE	FALSE	FALSE	FALSE	FALSE	FALSE	4.06	0.92	0.0667715	7.48384e-08	0.00162904	3.82	0.68	0.00463976	0.902019	0.964833	3.54	0.046297	0.0831158	Body;Body;Body;Body;Body	NA	Island	ANK1
cg08415582	8	57030523	FALSE	FALSE	FALSE	FALSE	FALSE	FALSE	FALSE	FALSE	FALSE	4.28	1.14	0.0592824	9.05217e-05	0.0479983	4.42	1.28	0.0219188	0.270128	0.574174	4.16	0.0473026	0.157648	NA	NA	Island	NA
cg15423872	8	58906736	FALSE	FALSE	FALSE	FALSE	FALSE	FALSE	FALSE	FALSE	FALSE	4.36	1.2	0.0485269	1.40362e-06	0.00698165	4.2	1.06	0.0164813	0.305514	0.614226	4.62	0.0321857	0.199135	TSS1500	NA	N_Shore	FAM110B
cg20296493	8	124219725	FALSE	FALSE	FALSE	FALSE	FALSE	FALSE	FALSE	FALSE	FALSE	4.16	1.02	0.0510543	7.32687e-06	0.0164044	4.24	1.1	0.0346919	0.000316256	0.0101081	4.54	0.0213311	0.426998	Body;Body	NA	Island	FAM83A
cg11716073	8	142182166	FALSE	FALSE	FALSE	FALSE	FALSE	FALSE	FALSE	FALSE	FALSE	4.82	1.68	0.0441187	2.08341e-05	0.0260801	4.7	1.56	0.00468973	0.51189	0.763958	3.84	0.00541391	0.912874	Body	NA	N_Shore	DENND3
cg13514324	8	145755804	TRUE	TRUE	FALSE	FALSE	FALSE	FALSE	FALSE	FALSE	TRUE	3.6	0.46	0.053519	1.21624e-05	0.0204524	4.52	1.38	0.0340868	0.0328081	0.165677	3.68	0.056365	0.010632	TSS1500;3'UTR	NA	Island	MGC70857 KIAA1688
cg26259926	8	145755974	TRUE	TRUE	FALSE	FALSE	FALSE	FALSE	FALSE	FALSE	FALSE	3.74	0.6	0.0577112	9.37833e-06	0.018941	4.6	1.46	0.0511712	0.0162994	0.108713	3.54	0.0867091	0.000788418	Body	NA	Island	KIAA1688
cg19633863	9	98981433	FALSE	TRUE	FALSE	FALSE	FALSE	FALSE	FALSE	FALSE	FALSE	4.58	1.44	0.0464964	2.59909e-06	0.0104986	4.98	1.84	0.0207653	0.00720689	0.0701481	4.1	0.0389855	0.0143086	NA	NA	Island	NA
cg14214257	9	102058671	FALSE	FALSE	FALSE	FALSE	FALSE	FALSE	FALSE	FALSE	FALSE	4.36	1.22	0.0679747	7.07685e-08	0.00162904	4.22	1.08	0.0183302	0.0468154	0.204058	3.98	0.0348451	0.113602	NA	NA	N_Shore	NA
cg07881032	9	102059051	FALSE	FALSE	FALSE	FALSE	FALSE	FALSE	FALSE	FALSE	FALSE	4.36	1.2	0.0642017	1.71181e-08	0.000745234	4.06	0.92	0.0339347	0.00371509	0.0475532	4.08	0.0464263	0.053043	NA	NA	Island	NA
cg20675702	10	13200491	FALSE	FALSE	FALSE	FALSE	FALSE	FALSE	FALSE	FALSE	FALSE	3.34	0.2	0.0723412	3.48459e-06	0.0118069	4.28	1.14	0.0485722	0.0205496	0.125888	3.56	0.0748456	0.0101691	NA	NA	N_Shelf	NA
cg09113440	10	18999313	FALSE	FALSE	FALSE	FALSE	FALSE	FALSE	FALSE	FALSE	FALSE	4.36	1.22	0.042892	2.26603e-05	0.0272351	3.72	0.58	0.0433698	0.00182847	0.0312059	4.08	0.0252173	0.0283821	NA	NA	Island	NA
cg02974659	10	29431837	FALSE	FALSE	FALSE	FALSE	FALSE	FALSE	FALSE	FALSE	FALSE	4.52	1.38	0.046487	5.15192e-05	0.0377307	4.66	1.52	0.0308505	0.00124434	0.0251489	4.02	0.0380339	0.0145581	NA	NA	NA	NA
cg11693285	10	131927345	FALSE	FALSE	FALSE	FALSE	FALSE	FALSE	FALSE	FALSE	FALSE	3.7	0.56	0.0630559	1.71563e-05	0.0231477	3.94	0.78	0.0634949	0.000737373	0.0182678	4.86	0.0219578	0.539591	NA	TRUE	Island	NA
cg02238549	10	131927554	FALSE	FALSE	FALSE	FALSE	FALSE	FALSE	FALSE	FALSE	FALSE	4.04	0.9	0.0466328	1.30063e-06	0.00688654	3.94	0.8	0.0372754	1.6269e-05	0.0012831	3.72	0.0465739	0.0354079	NA	TRUE	S_Shore	NA
cg14435498	10	133251574	FALSE	FALSE	FALSE	FALSE	FALSE	FALSE	FALSE	FALSE	FALSE	4.12	0.98	0.0489587	3.10497e-06	0.0113304	4.14	1	0.017201	0.131899	0.383708	3.68	0.0342824	0.0839932	NA	TRUE	NA	NA
cg09033333	10	133892406	FALSE	FALSE	TRUE	TRUE	FALSE	FALSE	FALSE	FALSE	FALSE	4.28	1.14	0.0784129	3.58523e-05	0.0326123	4.52	1.38	0.0129696	0.711044	0.868175	4.2	0.0468568	0.120226	NA	NA	NA	NA
cg19486271	11	47235900	FALSE	FALSE	FALSE	FALSE	FALSE	FALSE	FALSE	FALSE	FALSE	3.84	0.7	0.0565486	2.7095e-05	0.0290607	4.42	1.26	0.0546947	0.0419082	0.193889	4.08	0.0592031	0.0174569	TSS1500	NA	N_Shore	DDB2
cg12974393	11	107779099	FALSE	FALSE	FALSE	FALSE	FALSE	FALSE	FALSE	FALSE	FALSE	4.44	1.3	0.103171	3.31933e-07	0.00342253	3.24	0.1	0.0242518	0.575946	0.799198	4.22	0.104564	0.000345313	NA	NA	NA	NA
cg05014721	11	118842387	FALSE	TRUE	FALSE	FALSE	FALSE	FALSE	FALSE	FALSE	FALSE	4.32	1.18	0.0629158	2.13802e-05	0.0263701	4.26	1.1	0.0356452	0.00187479	0.0313008	3.78	0.070672	0.00796414	TSS200	NA	Island	FOXR1
cg18268562	11	118842392	FALSE	TRUE	FALSE	FALSE	FALSE	FALSE	FALSE	FALSE	FALSE	4.24	1.1	0.043886	6.93772e-05	0.043354	4.24	1.1	0.0296974	0.00639663	0.0663866	3.84	0.0507531	0.00961942	TSS200	NA	Island	FOXR1
cg05940452	11	118842484	TRUE	TRUE	FALSE	FALSE	FALSE	FALSE	FALSE	FALSE	FALSE	4.16	1.02	0.0662728	1.85627e-06	0.00816513	4	0.86	0.0372114	0.00941833	0.0750686	3.88	0.060698	0.0142592	5'UTR;1stExon	NA	Island	FOXR1
cg23670630	11	118842650	FALSE	TRUE	FALSE	FALSE	FALSE	FALSE	FALSE	FALSE	FALSE	4.34	1.18	0.0609499	1.78855e-05	0.023675	4.14	1	0.0355238	0.0248903	0.140557	3.88	0.0499255	0.0474461	1stExon	NA	Island	FOXR1
cg08765940	11	133789708	FALSE	TRUE	TRUE	TRUE	TRUE	FALSE	FALSE	FALSE	FALSE	3.7	0.56	0.055288	1.45124e-05	0.0217269	4.26	1.12	0.00407544	0.947701	0.982232	3.56	0.047469	0.0121304	Body	NA	Island	IGSF9B
cg11491407	12	1973872	FALSE	FALSE	FALSE	FALSE	FALSE	FALSE	FALSE	FALSE	FALSE	4.06	0.92	0.0406768	4.03188e-05	0.0344629	3.94	0.8	0.0155504	0.0091693	0.0750686	3.54	0.0437807	0.0133912	Body	NA	Island	CACNA2D4
cg27649194	12	1974168	FALSE	FALSE	FALSE	FALSE	FALSE	FALSE	FALSE	FALSE	FALSE	4.2	1.06	0.0460484	4.35701e-05	0.0352714	3.72	0.58	0.0227348	0.0184789	0.119049	3.54	0.0628428	0.00846744	Body	NA	Island	CACNA2D4
cg10635895	12	2339439	FALSE	FALSE	TRUE	TRUE	FALSE	FALSE	FALSE	FALSE	FALSE	4.2	1.06	0.0964712	8.39812e-09	0.000745234	4.6	1.46	0.0297651	0.0158293	0.108544	3.78	0.087292	0.00494162	Body;Body;Body;Body;Body;Body;Body;Body;Body;Body;Body;Body;Body;Body;Body;Body;Body;Body;Body;Body;Body;Body;Body	NA	Island	CACNA1C
cg23390118	12	2339513	FALSE	FALSE	TRUE	TRUE	FALSE	FALSE	FALSE	FALSE	FALSE	4.18	1.04	0.0454096	4.94953e-07	0.00427624	4.8	1.66	0.0165726	0.136456	0.391039	3.8	0.0522792	0.00915104	Body;Body;Body;Body;Body;Body;Body;Body;Body;Body;Body;Body;Body;Body;Body;Body;Body;Body;Body;Body;Body;Body;Body	NA	Island	CACNA1C
cg09576209	12	2339614	FALSE	FALSE	TRUE	TRUE	FALSE	FALSE	FALSE	FALSE	FALSE	4.18	1.04	0.0560639	1.56238e-08	0.000745234	4.3	1.16	0.0270732	0.00666329	0.0673343	3.96	0.0627416	0.00195443	Body;Body;Body;Body;Body;Body;Body;Body;Body;Body;Body;Body;Body;Body;Body;Body;Body;Body;Body;Body;Body;Body;Body	NA	Island	CACNA1C
cg01043616	12	50475035	FALSE	FALSE	TRUE	TRUE	FALSE	FALSE	FALSE	FALSE	FALSE	3.82	0.68	0.0592169	2.45959e-05	0.0284562	3.06	6.2	0.018428	0.0917609	0.315357	3.96	0.0564512	0.0159105	Body;Body	NA	Island	ACCN2
cg16615454	12	50475167	FALSE	FALSE	TRUE	TRUE	FALSE	FALSE	FALSE	FALSE	FALSE	3.98	0.84	0.040188	9.58586e-06	0.0190448	3.28	0.14	0.00918752	0.0748171	0.276248	4.08	0.0388816	0.0129309	Body;Body	NA	Island	ACCN2
cg10654546	12	56617576	FALSE	FALSE	FALSE	FALSE	FALSE	FALSE	FALSE	FALSE	FALSE	4.14	1	0.0522862	3.92125e-05	0.0338414	5.08	1.94	0.0237788	0.364947	0.661035	4.02	0.0400153	0.0890039	TSS1500	NA	N_Shore	OBFC2B
cg20112159	12	80907159	FALSE	FALSE	FALSE	FALSE	FALSE	FALSE	FALSE	FALSE	FALSE	4.5	1.36	0.0650683	2.08852e-08	0.000749576	4.52	1.38	0.0385845	0.00148607	0.0270092	4.06	0.0615981	0.0127247	Body	NA	NA	PTPRQ
cg09636302	12	96389483	FALSE	FALSE	TRUE	TRUE	FALSE	FALSE	FALSE	FALSE	FALSE	0.04	3.2	0.0683933	4.51128e-07	0.00427624	3.9	0.76	0.00636188	0.624685	0.821504	1.9	0.0255884	0.0844886	Body	NA	Island	HAL
cg27246571	12	96389588	FALSE	FALSE	TRUE	TRUE	FALSE	FALSE	FALSE	FALSE	FALSE	0.08	3.22	0.0582308	2.29571e-08	0.000749576	3.68	0.54	0.00149478	0.832719	0.933618	2.02	0.0179649	0.113602	Body	NA	Island	HAL
cg19721065	12	113549986	FALSE	FALSE	FALSE	FALSE	FALSE	FALSE	FALSE	FALSE	FALSE	3.72	0.58	0.0408622	9.47173e-05	0.0487668	4.06	0.92	0.0383717	0.00014782	0.00597503	2.72	0.0246811	0.157648	Body	NA	Island	RASAL1
cg20249210	12	115172502	FALSE	FALSE	FALSE	FALSE	FALSE	FALSE	FALSE	FALSE	FALSE	4.66	1.52	0.0495499	4.66963e-05	0.0362029	4.06	0.92	0.015439	0.325287	0.63086	4.64	0.040148	0.0318057	NA	TRUE	N_Shore	NA
cg11258452	12	119594454	TRUE	TRUE	FALSE	FALSE	FALSE	FALSE	FALSE	FALSE	FALSE	4.3	1.16	0.0523807	1.07157e-05	0.0195843	2.46	5.6	0.021823	0.0307185	0.161588	4.34	0.0477975	0.0869187	Body	NA	S_Shelf	SRRM4
cg12412089	12	128866172	FALSE	FALSE	FALSE	FALSE	FALSE	FALSE	FALSE	FALSE	FALSE	5.14	2	0.0480355	3.03328e-05	0.0300882	4.68	1.52	0.0325717	0.00230656	0.0353138	5.36	0.0493437	0.00638357	Body	NA	NA	TMEM132C
cg01016191	12	130707332	FALSE	FALSE	TRUE	TRUE	FALSE	FALSE	FALSE	FALSE	FALSE	4.88	1.74	0.0813924	2.02604e-05	0.0258237	4.62	1.48	0.034454	0.0294364	0.158092	3.84	0.0327462	0.322252	NA	NA	NA	NA
cg24229701	12	130821962	TRUE	TRUE	FALSE	FALSE	FALSE	FALSE	FALSE	FALSE	FALSE	4.4	1.26	0.104637	5.48953e-05	0.0390359	4.32	1.18	0.0547962	0.00488963	0.0586756	4.64	0.0515611	0.143716	TSS1500	NA	N_Shore	PIWIL1
cg05626790	12	133187174	FALSE	FALSE	FALSE	FALSE	FALSE	FALSE	FALSE	FALSE	FALSE	3.9	0.76	0.0413774	9.29848e-05	0.0483193	5.7	2.56	0.0180648	0.447195	0.71163	3.86	0.0722199	0.0141089	NA	TRUE	S_Shore	NA
cg10372829	13	20751257	FALSE	FALSE	FALSE	FALSE	FALSE	FALSE	FALSE	FALSE	FALSE	4.2	1.06	0.0513234	1.34387e-05	0.0213111	4.1	0.96	0.0137592	0.309854	0.616061	4.26	0.0459257	0.029658	NA	NA	Island	NA
cg03954144	13	20751679	FALSE	FALSE	FALSE	FALSE	FALSE	FALSE	FALSE	FALSE	FALSE	4.2	1.06	0.0988213	2.09708e-05	0.0260846	3.78	0.62	0.0320786	0.110928	0.356523	3.94	0.0685056	0.04773	NA	NA	Island	NA
cg09169779	13	20751710	FALSE	FALSE	FALSE	FALSE	FALSE	FALSE	FALSE	FALSE	FALSE	4.16	1.02	0.0627593	9.44452e-06	0.0189769	3.92	0.78	0.0299551	0.0268448	0.149397	4.02	0.0444553	0.0803154	NA	NA	Island	NA
cg14716095	13	20968690	FALSE	FALSE	FALSE	FALSE	FALSE	FALSE	FALSE	FALSE	FALSE	4.2	1.06	0.0498242	1.53046e-05	0.0220241	4.02	0.88	0.0189924	0.140122	0.395225	4.16	0.0526178	0.00538657	NA	NA	N_Shore	NA
cg14395298	13	23412250	TRUE	TRUE	FALSE	FALSE	FALSE	FALSE	FALSE	FALSE	FALSE	4.78	1.64	0.121383	1.22605e-05	0.0204629	4.04	0.9	0.0728157	0.0163041	0.108713	3.78	0.0760164	0.132468	NA	NA	Island	NA
cg14089267	13	23412409	TRUE	TRUE	FALSE	FALSE	FALSE	FALSE	FALSE	FALSE	TRUE	4.62	1.48	0.0902812	6.4544e-05	0.0427265	4.12	0.98	0.0679737	0.0085596	0.074957	4.36	0.105487	0.0237324	NA	NA	Island	NA
cg24702360	13	23412622	FALSE	TRUE	FALSE	FALSE	FALSE	FALSE	FALSE	FALSE	FALSE	4.58	1.44	0.0642151	3.75948e-05	0.033251	4.34	1.2	0.0456952	0.0229285	0.131411	4.54	0.0702823	0.00748529	NA	NA	Island	NA
cg21606928	13	23501122	FALSE	FALSE	FALSE	FALSE	FALSE	FALSE	FALSE	FALSE	FALSE	3.94	0.8	0.0599231	4.06362e-05	0.0344629	4.54	1.4	0.0267038	0.0569909	0.227963	3.92	0.123404	0.00796414	NA	NA	Island	NA
cg06116009	13	91827542	FALSE	FALSE	FALSE	FALSE	FALSE	FALSE	FALSE	FALSE	FALSE	3.82	0.68	0.0549538	6.95284e-05	0.0433793	4.08	0.94	0.0239401	0.121793	0.365615	3.88	0.0639494	0.01414	NA	TRUE	Island	NA
cg05313918	13	91827600	FALSE	FALSE	FALSE	FALSE	FALSE	FALSE	FALSE	FALSE	FALSE	3.9	0.76	0.0813278	2.46533e-05	0.0284562	4.18	1.04	0.0275445	0.528402	0.775562	3.74	0.104693	0.0306047	NA	TRUE	Island	NA
cg17121140	13	111719003	FALSE	FALSE	FALSE	FALSE	FALSE	FALSE	FALSE	FALSE	FALSE	4.02	0.88	0.0803238	2.95703e-06	0.0113304	4.2	1.06	0.0410909	0.0125561	0.0918386	3.84	0.0732565	0.00796414	NA	NA	N_Shore	NA
cg05890727	14	55764647	FALSE	FALSE	FALSE	FALSE	FALSE	FALSE	FALSE	FALSE	FALSE	5.6	2.46	0.0633391	1.0813e-05	0.0195843	0.7	3.84	0.00860255	0.636369	0.828358	0.28	0.0350732	0.132468	5'UTR;5'UTR	NA	N_Shore	FBXO34
cg24127506	14	102050490	FALSE	FALSE	FALSE	FALSE	FALSE	FALSE	FALSE	FALSE	FALSE	4.44	1.3	0.0509165	3.43988e-07	0.00345588	4.64	1.5	0.0188521	0.0349804	0.171757	4.72	0.0345725	0.0309751	NA	NA	N_Shore	NA
cg23012310	14	102050627	FALSE	FALSE	FALSE	FALSE	FALSE	FALSE	FALSE	FALSE	FALSE	4.54	1.4	0.0684824	1.42494e-06	0.00698165	4.4	1.26	0.0175095	0.034998	0.171757	4.12	0.0238694	0.0214332	NA	NA	N_Shore	NA
cg23429749	14	102050815	FALSE	FALSE	FALSE	FALSE	FALSE	FALSE	FALSE	FALSE	FALSE	4.3	1.16	0.053088	1.45213e-05	0.0217269	4.48	1.34	0.0149035	0.162523	0.434463	4.2	0.0405187	0.00961942	NA	NA	Island	NA
cg01067216	14	102051021	FALSE	FALSE	FALSE	FALSE	FALSE	FALSE	FALSE	FALSE	TRUE	4.48	1.34	0.056661	1.8863e-07	0.00246359	4.58	1.44	0.0198982	0.0943243	0.320536	3.98	0.027019	0.0214332	NA	NA	Island	NA
cg01250563	15	24142935	FALSE	FALSE	FALSE	FALSE	FALSE	FALSE	FALSE	TRUE	FALSE	4.6	1.46	0.0418269	2.48612e-06	0.0102585	4.62	1.48	0.0151334	0.0226547	0.130818	4.3	0.0301502	0.110315	NA	NA	NA	NA
cg11074933	15	26915414	FALSE	FALSE	FALSE	FALSE	FALSE	FALSE	FALSE	FALSE	FALSE	4.42	1.28	0.0478032	1.08132e-05	0.0195843	4.64	1.5	0.0269795	0.0047753	0.0582132	3.22	0.0242922	0.214371	Body;Body	NA	Island	GABRB3
cg26726006	15	29210444	FALSE	FALSE	TRUE	TRUE	FALSE	FALSE	FALSE	FALSE	FALSE	4.14	1	0.0547583	1.89638e-06	0.00816513	3.5	0.36	0.0276791	0.00592088	0.0640456	4.46	0.0241975	0.648973	NA	NA	NA	NA
cg01191259	15	29210460	FALSE	FALSE	TRUE	TRUE	FALSE	FALSE	FALSE	FALSE	FALSE	4.22	1.08	0.0830491	6.15122e-07	0.00472575	3.86	0.72	0.0438256	0.0213841	0.127853	4.38	0.0670205	0.01414	NA	TRUE	NA	NA
cg16225804	15	29210759	FALSE	FALSE	TRUE	TRUE	FALSE	FALSE	FALSE	FALSE	FALSE	4.26	1.12	0.0469779	4.38878e-06	0.0132512	4.56	1.42	0.0205139	0.0586315	0.232108	4.4	0.0530597	0.0240479	NA	TRUE	NA	NA
cg03330558	15	31516127	FALSE	FALSE	FALSE	FALSE	FALSE	FALSE	FALSE	FALSE	FALSE	4.4	1.26	0.0437787	3.59184e-05	0.0326123	1.98	5.12	0.0113788	0.569364	0.797941	4.14	0.024908	0.189	NA	TRUE	NA	NA
cg05432213	15	35086985	FALSE	FALSE	FALSE	FALSE	FALSE	FALSE	FALSE	FALSE	FALSE	4.4	1.26	0.0585572	3.12312e-06	0.0113304	4	0.86	0.0119115	0.102811	0.338881	4.34	0.064479	0.000345313	Body	NA	NA	ACTC1
cg12645284	15	79092878	FALSE	FALSE	FALSE	FALSE	FALSE	FALSE	FALSE	FALSE	FALSE	4.14	1	0.0620799	3.97741e-05	0.0341756	4.44	1.3	0.0582344	0.0146501	0.102584	3.82	0.0528156	0.00703564	Body	NA	Island	ADAMTS7
cg04171117	15	93652578	FALSE	FALSE	FALSE	FALSE	FALSE	FALSE	FALSE	FALSE	FALSE	4.48	1.34	0.0506597	3.53229e-06	0.0118291	4.28	1.14	0.020911	0.0506797	0.213857	4.3	0.0474652	0.0121304	NA	NA	N_Shore	NA
cg19322380	15	99408636	FALSE	FALSE	TRUE	TRUE	TRUE	FALSE	FALSE	FALSE	FALSE	5.04	1.9	0.065038	7.24138e-07	0.00517098	4.64	1.5	0.0608578	0.000381057	0.0112558	4.24	0.0457138	0.0354079	Body	NA	NA	IGF1R
cg21746425	15	99408804	FALSE	FALSE	TRUE	TRUE	TRUE	FALSE	FALSE	TRUE	FALSE	4.78	1.62	0.0603008	1.5511e-06	0.00732219	4.6	1.46	0.0244759	0.0108292	0.0807674	4.72	0.0367994	0.113242	Body	NA	NA	IGF1R
cg12553689	15	99408958	FALSE	FALSE	TRUE	TRUE	TRUE	FALSE	FALSE	TRUE	FALSE	4.82	1.68	0.0611786	1.24598e-07	0.00195292	4.86	1.72	0.0297091	0.00110875	0.0246267	4.44	0.0450314	0.0236601	Body	NA	NA	IGF1R
cg07615383	15	99409194	FALSE	FALSE	TRUE	TRUE	TRUE	FALSE	FALSE	TRUE	FALSE	4.82	1.68	0.059327	3.8169e-06	0.0122583	4.84	1.7	0.0327553	0.00219796	0.0344497	5.22	0.0547213	0.0465045	Body	NA	NA	IGF1R
cg00098799	15	99409360	FALSE	FALSE	TRUE	TRUE	TRUE	FALSE	FALSE	TRUE	FALSE	4.74	1.6	0.083884	9.29205e-05	0.0483193	4.74	1.58	0.0588234	1.4662e-05	0.0012831	4.42	0.0345154	0.503032	Body	TRUE	NA	IGF1R
cg13812291	15	99409411	FALSE	FALSE	TRUE	TRUE	TRUE	FALSE	FALSE	TRUE	FALSE	4.78	1.64	0.0615596	4.06821e-06	0.0127989	4.9	1.76	0.0386811	0.000204973	0.00770759	4.76	0.0343736	0.157648	Body	TRUE	NA	IGF1R
cg03380198	15	99409506	FALSE	FALSE	TRUE	TRUE	TRUE	FALSE	FALSE	TRUE	FALSE	4.84	1.7	0.0793649	1.07185e-07	0.00190894	4.64	1.5	0.0462311	1.6707e-05	0.0012831	4.88	0.0651807	0.00818639	Body	TRUE	NA	IGF1R
cg22730830	16	2867434	FALSE	TRUE	FALSE	FALSE	FALSE	FALSE	FALSE	FALSE	FALSE	3.8	0.66	0.0884218	2.76128e-06	0.0109284	3.78	0.64	0.0693041	0.000329039	0.0101081	3.68	0.0648572	0.0133912	Body;Body;Body	NA	Island	PRSS21
cg01232511	16	2867446	TRUE	TRUE	FALSE	FALSE	FALSE	FALSE	FALSE	FALSE	FALSE	3.82	0.68	0.0958332	4.72197e-06	0.0135046	3.9	0.76	0.0975904	0.000147108	0.00597503	3.82	0.0689867	0.00894791	Body;Body;Body	NA	Island	PRSS21
cg07798610	16	2867683	FALSE	TRUE	FALSE	FALSE	FALSE	FALSE	FALSE	FALSE	FALSE	3.86	0.72	0.0871302	6.83369e-05	0.0431613	3.82	0.68	0.0564327	1.56818e-05	0.0012831	3.98	0.0730448	0.054	Body;Body;Body	NA	Island	PRSS21
cg07516511	16	2907819	FALSE	FALSE	FALSE	FALSE	FALSE	FALSE	FALSE	FALSE	FALSE	3.54	0.4	0.0677569	5.14911e-05	0.0377307	3.14	0	0.0656457	4.89343e-05	0.00313179	3.66	0.099068	0.00274759	Body	NA	Island	PRSS22
cg05895034	16	2908892	FALSE	FALSE	FALSE	FALSE	FALSE	FALSE	FALSE	FALSE	FALSE	3.78	0.64	0.0457336	3.6017e-05	0.0326123	3.42	0.28	0.0363316	0.00234506	0.0353138	3.62	0.0844738	0.000929233	TSS1500	NA	S_Shore	PRSS22
cg09745688	16	2908918	FALSE	FALSE	FALSE	FALSE	FALSE	FALSE	FALSE	FALSE	FALSE	3.74	0.6	0.0452765	2.81482e-05	0.0296372	3.24	0.08	0.0405914	0.00948181	0.0750686	3.66	0.115383	0.000345313	TSS1500	NA	S_Shore	PRSS22
cg05490519	16	2908934	FALSE	FALSE	FALSE	FALSE	FALSE	FALSE	FALSE	FALSE	FALSE	3.68	0.54	0.0433967	2.49698e-05	0.0285924	3.32	0.18	0.0320244	0.00192341	0.0314293	3.76	0.0752093	0.00106774	TSS1500	NA	S_Shore	PRSS22
cg26613361	16	31830668	FALSE	FALSE	FALSE	FALSE	FALSE	FALSE	FALSE	FALSE	FALSE	4.56	1.42	0.0574601	4.22213e-05	0.0350485	0.58	3.72	0.0128127	0.0494766	0.211224	4.48	0.0466644	0.0120586	NA	NA	Island	NA
cg02608963	16	46878553	FALSE	FALSE	FALSE	FALSE	FALSE	FALSE	FALSE	FALSE	FALSE	4.46	1.3	0.0570996	1.87726e-06	0.00816513	4.38	1.24	0.0382422	0.000210755	0.00770759	4.16	0.0419171	0.0318057	NA	NA	Island	NA
cg09018739	16	57180107	FALSE	FALSE	FALSE	FALSE	FALSE	FALSE	FALSE	FALSE	FALSE	0.32	3.46	0.0409453	3.23094e-07	0.00342142	2.7	5.84	0.00362178	0.821748	0.929459	2.38	0.0142584	0.173214	Body	NA	NA	CPNE2
cg08770961	16	66956122	FALSE	FALSE	FALSE	FALSE	FALSE	FALSE	FALSE	FALSE	FALSE	4.24	1.1	0.0524015	2.14462e-05	0.0263701	1.54	4.68	0.00690388	0.742164	0.877658	4.14	0.0310553	0.175236	Body;Body	NA	Island	RRAD
cg15482422	16	66956240	FALSE	FALSE	FALSE	FALSE	FALSE	FALSE	FALSE	FALSE	FALSE	4.2	1.06	0.0408659	3.09385e-05	0.0303137	0.08	3.22	0.00113088	0.852952	0.947999	4.16	0.0447195	0.0138157	Body;Body	NA	Island	RRAD
cg19811683	17	16587128	FALSE	FALSE	FALSE	FALSE	FALSE	FALSE	FALSE	FALSE	FALSE	4.28	1.14	0.074905	1.18e-05	0.0201837	4.9	1.76	0.00976674	0.665961	0.84399	4.4	0.0903636	0.00607417	NA	NA	NA	NA
cg15193133	17	19883474	FALSE	FALSE	FALSE	FALSE	FALSE	FALSE	FALSE	FALSE	FALSE	4.26	1.12	0.0525778	3.73306e-05	0.033092	4.26	1.12	0.00638626	0.576206	0.799198	3.92	0.0491842	0.00996335	NA	NA	Island	NA
cg12684052	17	19883602	FALSE	FALSE	FALSE	FALSE	FALSE	FALSE	FALSE	FALSE	FALSE	4.32	1.18	0.0592485	5.37582e-06	0.0141605	4.86	1.72	0.0216917	0.0910792	0.315357	4.22	0.0537308	0.0307418	NA	NA	Island	NA
cg07870541	17	20687481	FALSE	FALSE	FALSE	FALSE	FALSE	FALSE	FALSE	FALSE	FALSE	4.48	1.34	0.0546034	4.03113e-09	0.000526485	3.94	0.8	0.0242846	0.00943027	0.0750686	4.08	0.0351015	0.0857643	NA	NA	N_Shore	NA
cg19131647	17	27397005	TRUE	TRUE	FALSE	FALSE	FALSE	FALSE	FALSE	FALSE	FALSE	4.14	1	0.0564813	8.83177e-05	0.0475985	4.64	1.5	0.0109092	0.847077	0.943958	4.58	0.0329688	0.215368	NA	NA	NA	NA
cg26094004	17	42075116	FALSE	FALSE	FALSE	FALSE	FALSE	FALSE	FALSE	FALSE	FALSE	1.38	4.52	0.0498482	8.22231e-07	0.00520639	0.66	3.8	0.0102571	0.342001	0.636631	3.38	0.0353345	0.248188	5'UTR	NA	S_Shelf	PYY
cg18026225	17	43198423	FALSE	FALSE	FALSE	FALSE	FALSE	FALSE	FALSE	FALSE	FALSE	3.88	0.74	0.0733771	9.79519e-07	0.00590445	4.62	1.48	0.0283536	0.00271741	0.0393768	3.32	0.0517698	0.0462718	Body	NA	Island	PLCD3
cg12582317	17	55822272	FALSE	FALSE	FALSE	FALSE	FALSE	FALSE	FALSE	FALSE	FALSE	0.22	3.36	0.0413158	7.53299e-05	0.0441734	5.42	2.28	0.0144199	0.300701	0.606137	1.6	0.0262538	0.163431	NA	NA	NA	NA
cg01109337	17	56744332	FALSE	FALSE	TRUE	TRUE	FALSE	FALSE	FALSE	FALSE	FALSE	4.78	1.64	0.0460655	3.28378e-05	0.0316207	4.26	1.12	0.022798	0.0725511	0.269175	5.28	0.0197167	0.278808	5'UTR;5'UTR	NA	NA	TEX14
cg15249796	17	56744413	FALSE	FALSE	TRUE	TRUE	FALSE	FALSE	FALSE	FALSE	FALSE	4.96	1.82	0.0564901	2.41461e-05	0.0283257	4.36	1.22	0.0300863	0.0539742	0.221669	5.04	0.0190642	0.398848	5'UTR;5'UTR	TRUE	NA	TEX14
cg16017144	17	77100082	FALSE	FALSE	FALSE	FALSE	FALSE	FALSE	FALSE	FALSE	FALSE	3.3	0.16	0.0509573	8.36567e-05	0.0463285	4.18	1.04	0.0136233	0.110981	0.356523	3.64	0.0507675	0.0359371	Body	TRUE	Island	HRNBP3
cg11225357	17	79339278	FALSE	FALSE	FALSE	FALSE	FALSE	TRUE	FALSE	FALSE	FALSE	4.28	1.14	0.0437992	9.34604e-05	0.0484379	4.06	0.92	0.0288465	0.0436124	0.197967	4.34	0.060469	0.00818639	NA	TRUE	NA	NA
cg12899381	18	5891602	FALSE	FALSE	FALSE	FALSE	FALSE	FALSE	FALSE	FALSE	FALSE	4.3	1.16	0.053491	2.84189e-05	0.0296372	4.98	1.84	0.0172477	0.0680114	0.261164	4.12	0.0351696	0.291098	1stExon	NA	Island	TMEM200C
cg26438105	18	5892119	FALSE	FALSE	FALSE	FALSE	FALSE	FALSE	FALSE	FALSE	FALSE	4.32	1.18	0.0691331	9.66879e-06	0.0190448	4.86	1.72	0.0316801	0.0095514	0.0750686	3.84	0.050951	0.0421641	TSS200	NA	S_Shore	TMEM200C
cg27093273	18	5892213	FALSE	FALSE	FALSE	FALSE	FALSE	FALSE	FALSE	FALSE	FALSE	4.36	1.22	0.0603669	1.54189e-05	0.0220487	4.76	1.62	0.0282511	0.000827838	0.0198681	3.8	0.0416883	0.0995195	TSS200	NA	S_Shore	TMEM200C
cg17586988	18	5892245	FALSE	FALSE	FALSE	FALSE	FALSE	FALSE	FALSE	FALSE	FALSE	4.16	1.02	0.072779	5.23367e-06	0.0140454	4.78	1.64	0.0142592	0.0795879	0.286965	3.9	0.0348885	0.220034	TSS200	NA	S_Shore	TMEM200C
cg14613786	18	48255506	FALSE	FALSE	FALSE	FALSE	FALSE	FALSE	FALSE	FALSE	FALSE	4.34	1.2	0.0455975	5.18235e-05	0.0378122	4.18	1.02	0.0401504	0.00568213	0.0632446	4.16	0.040705	0.0306047	Body	NA	N_Shore	MAPK4
cg13939809	18	61669940	FALSE	FALSE	FALSE	FALSE	FALSE	FALSE	FALSE	FALSE	FALSE	4.04	0.9	0.0579691	1.8672e-09	0.000365798	4.42	1.28	0.0333165	9.88273e-06	0.0012831	4.06	0.0333057	0.0466128	NA	NA	Island	NA
cg06595072	18	61670207	FALSE	FALSE	FALSE	FALSE	FALSE	FALSE	FALSE	FALSE	FALSE	3.92	0.78	0.0436237	5.02042e-07	0.00427624	4.28	1.14	0.0210806	0.00748977	0.0701481	3.72	0.0387282	0.016668	NA	NA	Island	NA
cg13287964	18	77905751	FALSE	FALSE	TRUE	TRUE	TRUE	FALSE	FALSE	TRUE	FALSE	4.64	1.5	0.063935	1.59476e-05	0.0225555	4.3	1.16	0.043252	0.00748239	0.0701481	5	0.00817809	0.908325	TSS200;TSS200	NA	S_Shore	LOC100130522
cg06595479	19	519035	FALSE	FALSE	FALSE	FALSE	FALSE	FALSE	FALSE	FALSE	FALSE	3.68	0.54	0.0493904	7.92669e-05	0.0451423	5.2	2.06	0.0183974	0.207127	0.490076	3.74	0.0706416	0.0202272	Body	TRUE	Island	C19orf20
cg17771569	19	1789618	FALSE	FALSE	FALSE	FALSE	FALSE	FALSE	FALSE	FALSE	FALSE	4.44	1.3	0.0536397	3.6808e-06	0.012197	5.06	1.92	0.0222651	0.0329998	0.165677	4.32	0.0367392	0.0352486	Body	TRUE	Island	ATP8B3
cg13316977	19	12865609	FALSE	FALSE	FALSE	FALSE	FALSE	FALSE	FALSE	FALSE	FALSE	4.22	1.08	0.0407363	4.47849e-05	0.0358528	4.7	1.56	0.0249298	0.04951	0.211224	3.86	0.0425666	0.0359934	Body	NA	Island	BEST2
cg17960886	19	22800629	FALSE	FALSE	FALSE	FALSE	FALSE	FALSE	FALSE	FALSE	FALSE	4.58	1.44	0.0500601	7.10309e-06	0.0161808	4.9	1.76	0.0209086	0.0461894	0.203871	4.32	0.0467565	0.00910656	NA	NA	N_Shore	NA
cg01545223	19	22801034	FALSE	FALSE	FALSE	FALSE	FALSE	FALSE	FALSE	FALSE	FALSE	4.74	1.6	0.0498108	1.30759e-05	0.0211707	4.62	1.48	0.0136528	0.78353	0.90899	4.7	0.051257	0.0863823	NA	NA	Island	NA
cg22340508	19	22891978	FALSE	FALSE	FALSE	FALSE	FALSE	FALSE	FALSE	FALSE	FALSE	4.06	0.92	0.0506747	4.56796e-05	0.0359771	4.52	1.38	0.0261713	0.0206912	0.125888	3.72	0.0368101	0.0614967	NA	NA	Island	NA
cg10721834	19	22990066	FALSE	FALSE	FALSE	FALSE	FALSE	FALSE	FALSE	FALSE	FALSE	3.82	0.68	0.0457497	1.61199e-05	0.022638	4.48	1.34	0.0144307	0.190799	0.465586	3.7	0.0271248	0.0200979	NA	NA	Island	NA
cg08871608	19	40729274	TRUE	TRUE	FALSE	FALSE	FALSE	FALSE	FALSE	FALSE	FALSE	4.56	1.4	0.0478305	3.64978e-05	0.0327989	5.44	2.3	0.00762629	0.174193	0.443568	4.7	0.0342771	0.0258874	Body	TRUE	Island	CNTD2
cg00851394	19	40730425	FALSE	FALSE	FALSE	FALSE	FALSE	FALSE	FALSE	FALSE	FALSE	4.72	1.58	0.0547113	2.13809e-08	0.000749576	4.66	1.52	0.0183637	0.593438	0.801786	4.68	0.0587406	0.000116509	Body	NA	Island	CNTD2
cg23850904	19	40730628	FALSE	FALSE	FALSE	FALSE	FALSE	FALSE	FALSE	FALSE	FALSE	4.52	1.36	0.0540327	1.70465e-05	0.0231477	4.82	1.68	0.0155138	0.350963	0.643293	4.66	0.0739374	0.00662366	Body	NA	Island	CNTD2
cg24923931	19	40904691	TRUE	TRUE	TRUE	TRUE	TRUE	FALSE	FALSE	FALSE	FALSE	4.46	1.32	0.0741214	6.27031e-06	0.0153664	3.92	0.78	0.0146392	0.238383	0.531156	4	0.0694971	0.0214332	Body;Body	NA	Island	PRX
cg00478479	19	40904851	FALSE	TRUE	TRUE	TRUE	TRUE	FALSE	FALSE	FALSE	FALSE	4.04	0.9	0.08512	7.8027e-07	0.00520639	3.9	0.76	0.0152827	0.368978	0.662091	3.98	0.104245	0.0110316	Body;Body	NA	Island	PRX
cg07855456	19	43912227	FALSE	FALSE	TRUE	TRUE	FALSE	FALSE	FALSE	FALSE	FALSE	4.08	0.94	0.0770112	3.75292e-06	0.012197	4.42	1.28	0.0199779	0.300532	0.606137	4.1	0.0788731	0.00258954	Body	NA	Island	TEX101
cg21198638	19	46525566	FALSE	TRUE	TRUE	TRUE	FALSE	FALSE	FALSE	FALSE	FALSE	4.4	1.26	0.0497874	2.992e-05	0.0298297	3.88	0.74	0.03445	7.72146e-05	0.00348828	4.02	0.0402458	0.0847703	Body	TRUE	N_Shore	PGLYRP1
cg10599948	19	49244571	FALSE	FALSE	FALSE	FALSE	FALSE	FALSE	FALSE	FALSE	FALSE	3.76	0.62	0.0417304	7.53889e-05	0.0441734	5.46	2.32	0.0117757	0.510748	0.763958	4.32	0.0425304	0.0165788	Body;TSS1500	NA	S_Shore	IZUMO1 RASIP1
cg26931208	19	49244592	FALSE	FALSE	FALSE	FALSE	FALSE	FALSE	FALSE	FALSE	FALSE	3.76	0.62	0.0486623	4.56135e-05	0.0359771	5.36	2.22	0.00940073	0.757977	0.888743	4.32	0.0450106	0.0202272	Body;TSS1500	NA	S_Shore	IZUMO1 RASIP1
cg17434634	19	49522954	TRUE	TRUE	FALSE	FALSE	FALSE	FALSE	FALSE	FALSE	FALSE	3.94	0.8	0.0764683	3.71091e-06	0.012197	4.06	0.92	0.0484053	0.0492775	0.211224	3.98	0.105722	0.00748529	NA	TRUE	Island	NA
cg14106680	19	50733985	FALSE	FALSE	TRUE	TRUE	FALSE	FALSE	FALSE	FALSE	FALSE	4.6	1.46	0.0676217	6.97702e-06	0.0159865	3.28	0.14	0.0293831	0.0661279	0.256496	4.34	0.0549675	0.0612755	Body;Body;Body	NA	Island	MYH14
cg02192974	19	50734272	FALSE	FALSE	TRUE	TRUE	FALSE	FALSE	FALSE	FALSE	FALSE	4.58	1.44	0.0537155	6.71039e-05	0.0428911	2.54	5.68	0.0215194	0.180614	0.451857	4.16	0.0385462	0.0258874	Body;Body;Body	NA	Island	MYH14
cg11992783	19	50734287	FALSE	FALSE	TRUE	TRUE	FALSE	FALSE	FALSE	FALSE	FALSE	4.52	1.38	0.0769184	7.30225e-06	0.0164044	3.1	6.24	0.0315713	0.0572876	0.227963	4.36	0.0469114	0.036255	Body;Body;Body	NA	Island	MYH14
cg04358463	19	56215104	FALSE	FALSE	FALSE	FALSE	FALSE	FALSE	FALSE	FALSE	FALSE	4.6	1.46	0.0629744	3.81883e-05	0.0333792	0.36	3.52	0.00388106	0.648176	0.833749	4.3	0.0505002	0.0492318	NA	NA	N_Shore	NA
cg21235746	20	5485144	FALSE	FALSE	FALSE	FALSE	FALSE	FALSE	FALSE	FALSE	FALSE	4.62	1.48	0.0689132	1.78092e-05	0.0236539	4.5	1.36	0.0682438	0.0215631	0.127853	4.1	0.0603778	0.0847703	Body	NA	NA	LOC149837
cg03287299	20	5485245	FALSE	FALSE	FALSE	FALSE	FALSE	FALSE	FALSE	FALSE	FALSE	4.5	1.36	0.053699	2.7293e-05	0.0290607	4.42	1.28	0.0547803	0.0305471	0.161588	4.22	0.0517469	0.0927131	TSS200	NA	NA	LOC149837
cg25958766	20	5485268	FALSE	FALSE	FALSE	FALSE	FALSE	FALSE	FALSE	FALSE	FALSE	4.58	1.44	0.0608671	2.90565e-05	0.0296372	4.48	1.34	0.0550309	0.022447	0.130601	4.28	0.0475275	0.120226	TSS200	NA	NA	LOC149837
cg20295248	20	5485270	FALSE	FALSE	FALSE	FALSE	FALSE	FALSE	FALSE	FALSE	FALSE	4.5	1.36	0.078631	6.47728e-05	0.0427265	4.4	1.26	0.0846545	0.010223	0.0785126	4.52	0.038027	0.157237	TSS200	NA	NA	LOC149837
cg16763089	20	5485284	FALSE	FALSE	FALSE	FALSE	FALSE	FALSE	FALSE	FALSE	FALSE	4.54	1.4	0.0830393	5.79321e-06	0.0146581	4.4	1.26	0.086577	0.00939206	0.0750686	4.46	0.0485705	0.118675	TSS200	NA	NA	LOC149837
cg10831901	20	5485294	FALSE	FALSE	FALSE	FALSE	FALSE	FALSE	FALSE	FALSE	FALSE	4.52	1.38	0.0771379	3.21824e-06	0.0113976	4.34	1.2	0.0750039	0.0151589	0.104883	4.5	0.0439999	0.0937008	TSS200	NA	NA	LOC149837
cg27158481	20	25128681	FALSE	FALSE	FALSE	FALSE	FALSE	FALSE	FALSE	FALSE	FALSE	4.4	1.26	0.0409624	5.51389e-05	0.0391302	4.02	0.88	0.0265672	0.00254013	0.0375158	4.16	0.041997	0.00796414	TSS200;Body;Body	TRUE	N_Shore	LOC284798
cg20310608	20	25128805	FALSE	FALSE	FALSE	FALSE	FALSE	FALSE	FALSE	FALSE	FALSE	4.42	1.28	0.0440496	4.88046e-05	0.0367439	4.2	1.06	0.0274892	0.00151223	0.0270092	3.92	0.0683845	0.0881451	TSS200;Body;Body	TRUE	Island	LOC284798
cg14448104	20	43933556	FALSE	FALSE	FALSE	FALSE	FALSE	FALSE	FALSE	FALSE	FALSE	4.58	1.44	0.0471596	1.08322e-05	0.0195843	3.74	0.6	0.0163362	0.213079	0.501841	4.48	0.0415119	0.0214332	Body;Body;Body	NA	N_Shore	MATN4
cg19911058	20	55904856	FALSE	FALSE	FALSE	FALSE	FALSE	FALSE	FALSE	FALSE	FALSE	4.68	1.54	0.0425921	7.39062e-07	0.00517098	4.72	1.58	0.0168686	0.385868	0.674233	5.36	0.0130571	0.666873	5'UTR;1stExon;1stExon;5'UTR	NA	Island	SPO11
cg11321156	21	27372396	FALSE	FALSE	FALSE	FALSE	FALSE	FALSE	FALSE	FALSE	FALSE	4.56	1.42	0.0409972	2.60936e-05	0.0286497	5.9	2.76	0.0113794	0.129475	0.379222	4.52	0.0207168	0.324253	Body;Body;Body;Body;Body	NA	NA	APP
cg18274664	21	27372461	FALSE	FALSE	FALSE	FALSE	FALSE	FALSE	FALSE	FALSE	FALSE	4.6	1.44	0.0455959	3.23812e-05	0.0314044	5.44	2.3	0.0107487	0.237473	0.531156	4.68	0.0193988	0.299895	Body;Body;Body;Body;Body	NA	NA	APP
cg14716686	21	30452862	FALSE	FALSE	FALSE	FALSE	FALSE	FALSE	FALSE	FALSE	FALSE	4.44	1.3	0.0623945	5.25129e-05	0.0380319	0.2	3.34	0.0045779	0.966916	0.987996	4.02	0.0263567	0.408873	TSS200	NA	NA	C21orf7
cg03043822	22	25160098	FALSE	FALSE	FALSE	FALSE	FALSE	FALSE	FALSE	FALSE	FALSE	4.44	1.3	0.0542926	6.47353e-05	0.0427265	3.94	0.8	0.0278641	0.0465248	0.204058	4.24	0.0523917	0.00258954	TSS1500;5'UTR	NA	Island	TOP1P2 PIWIL3
cg13627197	22	25160378	FALSE	FALSE	FALSE	FALSE	FALSE	FALSE	FALSE	FALSE	FALSE	4.32	1.18	0.0412462	2.56292e-05	0.0285924	3.7	0.56	0.00592633	0.532189	0.775562	4.34	0.0226649	0.237113	TSS200;5'UTR	NA	S_Shore	TOP1P2 PIWIL3
cg22897224	22	25160406	FALSE	FALSE	FALSE	FALSE	FALSE	FALSE	FALSE	FALSE	FALSE	4.24	1.1	0.0432053	6.31261e-06	0.0153664	4.22	1.08	0.0157948	0.0553054	0.225928	4.48	0.0179456	0.232907	TSS200;5'UTR	NA	S_Shore	TOP1P2 PIWIL3
cg12727018	22	46436665	FALSE	FALSE	FALSE	FALSE	FALSE	FALSE	FALSE	FALSE	FALSE	5.88	2.72	0.0417568	3.38786e-05	0.032063	2.86	6	0.00351556	0.936415	0.982232	0.6	0.021606	0.555165	Body	NA	N_Shelf	LOC100271722

## Sheet: 1e
SoC-CpG clusters and singletons
Clusters are defined with inter-CpG distance <5kbp
chr	loc	n.cpgs	width (bp)	UCSC_RefGene_450k
1	1774322	1	2	GNB1
1	29460817	3	255
1	44031756	2	72	PTPRF
1	45190519	1	2	C1orf228
1	86081680	2	35
1	113285118	2	271
1	227746191	2	2523
2	5813258	1	2
2	11123476	2	142
2	24397810	1	2	C2orf84
2	48844971	1	2	GTF2A1L STON1-GTF2A1L
2	72079413	4	198
2	97505275	1	2	ANKRD23
2	115419729	1	2	DPP10
2	120976896	1	2
2	121412432	1	2
2	121776314	2	292
2	131673771	3	406	ARHGEF4
2	150177004	1	2
2	170624685	3	796
2	232348602	3	194
2	233246136	1	2	ALPP
2	233323532	2	405	ALPI
2	239072961	1	2
3	10370264	2	362	ATP2B2
3	10806288	1	2	LOC285370
3	72704603	2	100
3	100401284	1	2	GPR128
3	128765558	1	2
3	137361526	1	2
3	142666108	1	2
3	170202937	1	2	SLC7A14
3	180588198	1	2
3	187388281	1	2	SST
4	1512966	2	125
4	2341370	2	72	ZFYVE28
4	24801110	1	2	SOD3
4	58060609	3	1384
4	147163613	1	2
5	322735	1	2	AHRR
5	38845028	1	2	OSMR
5	74952444	1	2
5	78365801	2	277	BHMT2 DMGDH
5	139743303	1	2	SLC4A9
5	153873149	1	2
5	173739399	1	2
5	176216711	1	2
5	180479586	1	2	BTNL9
6	3248098	1	2
6	4079342	2	10	C6orf201 C6orf146
6	13860443	1	2
6	26592423	1	2
6	28584053	4	413
6	31148463	5	205
6	31543219	1	2	TNF
6	34499488	1	2	PACSIN1
6	36929838	3	226	PI16
6	74064047	3	253	DPPA5
6	74104594	2	209	DDX43
6	90597394	1	2
6	129251071	1	2	LAMA2
6	160783785	1	2	SLC22A3
6	163570371	1	2	PACRG
6	164288623	1	2
7	27127501	1	2
7	38350921	4	307
7	47580148	1	2	TNS3
7	111368651	1	2	DOCK4
7	156786077	1	2
7	157185402	1	2	DNAJB6
8	2012595	1	2	MYOM2
8	2212328	1	2
8	41583136	3	389	ANK1
8	57030523	1	2
8	58906736	1	2	FAM110B
8	124219725	1	2	FAM83A
8	142182166	1	2	DENND3
8	145755804	2	172	MGC70857 KIAA1688,KIAA1688
9	98981433	1	2
9	102058671	2	382
10	13200491	1	2
10	18999313	1	2
10	29431837	1	2
10	131927345	2	211
10	133251574	1	2
10	133892406	1	2
11	47235900	1	2	DDB2
11	107779099	1	2
11	118842387	4	265	FOXR1
11	133789708	1	2	IGSF9B
12	1973872	2	298	CACNA2D4
12	2339439	3	177	CACNA1C
12	50475035	2	134	ACCN2
12	56617576	1	2	OBFC2B
12	80907159	1	2	PTPRQ
12	96389483	2	107	HAL
12	113549986	1	2	RASAL1
12	115172502	1	2
12	119594454	1	2	SRRM4
12	128866172	1	2	TMEM132C
12	130707332	1	2
12	130821962	1	2	PIWIL1
12	133187174	1	2
13	20751257	3	455
13	20968690	1	2
13	23412250	3	374
13	23501122	1	2
13	91827542	2	60
13	111719003	1	2
14	55764647	1	2	FBXO34
14	102050490	4	533
15	24142935	1	2
15	26915414	1	2	GABRB3
15	29210444	3	317
15	31516127	1	2
15	35086985	1	2	ACTC1
15	79092878	1	2	ADAMTS7
15	93652578	1	2
15	99408636	7	872	IGF1R
16	2867434	3	251	PRSS21
16	2907819	4	1117	PRSS22
16	31830668	1	2
16	46878553	1	2
16	57180107	1	2	CPNE2
16	66956122	2	120	RRAD
17	16587128	1	2
17	19883474	2	130
17	20687481	1	2
17	27397005	1	2
17	42075116	1	2	PYY
17	43198423	1	2	PLCD3
17	55822272	1	2
17	56744332	2	83	TEX14
17	77100082	1	2	HRNBP3
17	79339278	1	2
18	5891602	4	645	TMEM200C
18	48255506	1	2	MAPK4
18	61669940	2	269
18	77905751	1	2	LOC100130522
19	519035	1	2	C19orf20
19	1789618	1	2	ATP8B3
19	12865609	1	2	BEST2
19	22800629	2	407
19	22891978	1	2
19	22990066	1	2
19	40729274	3	1356	CNTD2
19	40904691	2	162	PRX
19	43912227	1	2	TEX101
19	46525566	1	2	PGLYRP1
19	49244571	2	23	IZUMO1 RASIP1
19	49522954	1	2
19	50733985	3	304	MYH14
19	56215104	1	2
20	5485144	6	152	LOC149837
20	25128681	2	126	LOC284798
20	43933556	1	2	MATN4
20	55904856	1	2	SPO11
21	27372396	2	67	APP
21	30452862	1	2	C21orf7
22	25160098	3	310	TOP1P2 PIWIL3
22	46436665	1	2	LOC100271722

## Sheet: 1f
SoC-CpG cluster sizes
cluster size (nCpGs)	SoC-CpGs
	n clusters	n CpGs	%total
1	105	105	0.405405
2	30	60	0.23166
3	16	48	0.185328
4	7	28	0.108108
5	1	5	0.019305
6	1	6	0.023166
7	1	7	0.027027
Total	161	259	1
clusters defined as contiguous CpGs where each CpG is within 5,000bp of the nearest neighbouring CpG

## Sheet: 1g
SoC-CpG enrichment for MEs
test set	feature set*	n.test.cgs	OR.cg	p.value.cg**	n.test.cgs.clust	OR.clust	p.value.clust***
SoC-CpGs	all.ME	259	21.428	3e-23	161	16.79	3.1e-11
matched_controls	all.ME	259	0	1	244	0	1
SoC-CpG overlap with ME sub-classes identified in different ME screens
test set	ME set*	n MEs in ME set****	n MEs overlapping test.set
SoC-CpGs	siv.450k	816	19
SoC-CpGs	siv.wgbs	160	1
SoC-CpGs	ess.450k	1251	7
SoC-CpGs	all.ME	1881	24
matched_controls	siv.450k	816	0
matched_controls	siv.wgbs	160	0
matched_controls	ess.450k	1251	0
matched_controls	all.ME	1881	0
*all.ME	CpGs intersecting any of the three ME screens listed below
siv.450k	CpGs exhibiting systemic interindividual variation identified from multi-tissue 450k screen in Van Baak, T. E. et al. Epigenetic supersimilarity of monozygotic twin pairs. Genome Biology 19, 2 (2018).
siv.wgbs	CpGs exhibiting systemic interindividual variation identified from multi-tissue WGBS screen in Kessler, N. J., Waterland, R. A., Prentice, A. M. & Silver, M. J. Establishment of environmentally sensitive DNA methylation states in the very early human embryo. Sci. Adv. 4, eaat2624 (2018).
ess.450k	CpGs exhibiting epigenetic supersimilarity identified in MZ/DZ twin analysis in Van Baak, T. E. et al. Epigenetic supersimilarity of monozygotic twin pairs. Genome Biology 19, 2 (2018).
**Fisher Exact Test for enrichment; MEs are tested for direct overlap
***cluster-wise tests use filtered test sets with minimum inter-CpG distance of 5kbp
****overlapping array background

## Sheet: 1h
SoC-CpG enrichment for gDMRs and parent-of-origin specific methylation
test set	feat.set	n.test.cgs	OR.cg	p.value.cg*	n.test.cgs.clust	OR.clust	p.value.clust*
SoC-CpGs	zink.PofOm	259	18.03	3e-08	165	6.88	0.036			OR > 2
SoC-CpGs	oo.gDMR	259	6.21	2.3e-16	165	4.99	5.4e-08			p < 1E-3
SoC-CpGs	oo.blast.gDMR	259	7.31	1.6e-18	165	5.89	4.4e-09
SoC-CpGs	oo.blast.plac.gDMR	259	6.2	4.7e-07	165	4.42	0.003
SoC-CpGs	sp.gDMR	259	0.18	1	165	0.29	1
SoC-CpGs	sp.blast.gDMR	259	0	1	165	0	1
ME	zink.PofOm	1881	14.94	1.8e-36	1389	9.26	2.6e-14
ME	oo.gDMR	1881	2.92	1.2e-24	1389	2.77	1.4e-16
ME	oo.blast.gDMR	1881	2.91	2.2e-21	1389	2.7	9.6e-14
ME	oo.blast.plac.gDMR	1881	4.8	5.5e-26	1389	4.05	1.9e-14
ME	sp.gDMR	1881	0.61	1	1389	0.74	1
ME	sp.blast.gDMR	1881	2.57	0.022	1389	2.48	0.055
ctrl	zink.PofOm	259	0	1	251	0	1
ctrl	oo.gDMR	259	0.75	0.79	251	0.46	0.96
ctrl	oo.blast.gDMR	259	0.71	0.81	251	0.36	0.97
ctrl	oo.blast.plac.gDMR	259	0	1	251	0	1
ctrl	sp.gDMR	259	1.74	0.0014	251	1.81	0.00076
ctrl	sp.blast.gDMR	259	0	1	251	0	1
PofOm	oo.gDMR	699	65.25	0	119	33.11	1.2e-54	POSITIVE CONTROLS
PofOm	oo.blast.gDMR	699	68.35	0	119	37.74	8.5e-57
PofOm	oo.blast.plac.gDMR	699	122.1	0	119	57.74	2.6e-50
PofOm	sp.gDMR	699	0.17	1	119	0.58	0.95
PofOm	sp.blast.gDMR	699	0	1	119	0	1
*Fisher Exact Test for enrichment
cluster-wise tests use filtered test sets with minimum inter-CpG distance of 5kbp

[truncated: 11 more sheets: 1i, 1j, 1k, 1l, 1m, 1n, 1o, 1p, 1q, 1r, 1s]
