# Supplementary figures and images for: Environmentally sensitive hotspots in the methylome of the early human embryo
Source: eLife journal article supplement (doi:10.7554/elife.72031), 2022-02-21

CD4T

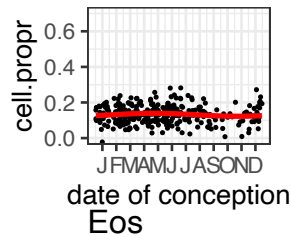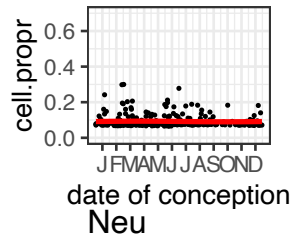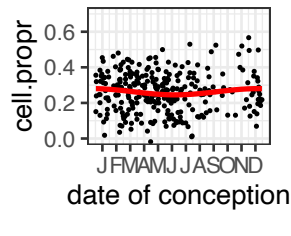

## EMPHASIS

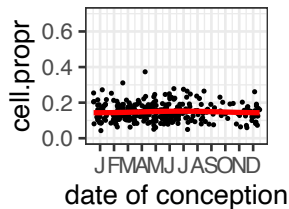

Supplement: supp [file elife-72031-supp-v1.zip]

EMPHASIS (7-9yr)  
mean methylation (%)

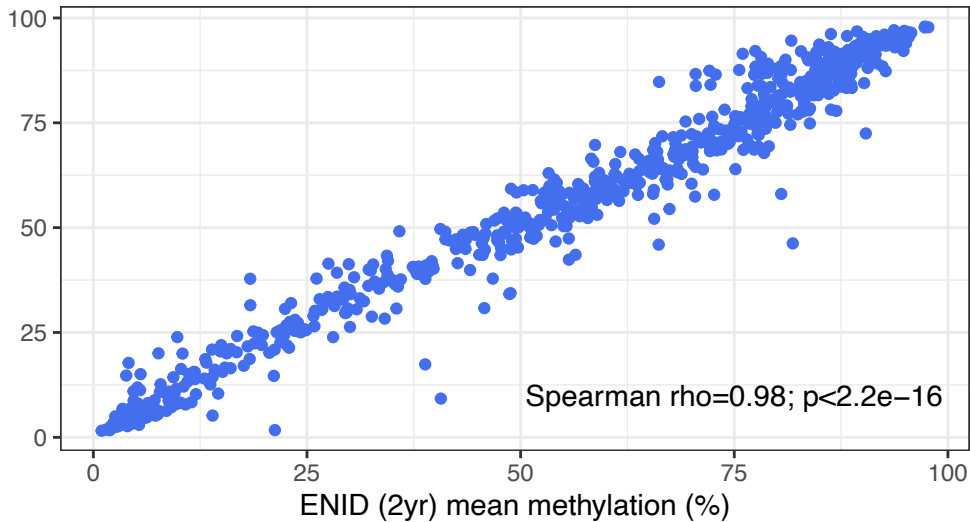

Supplement: supp [file elife-72031-supp-v1.zip › elife_poa_e72031_Appendix_1_figure_1.pdf]

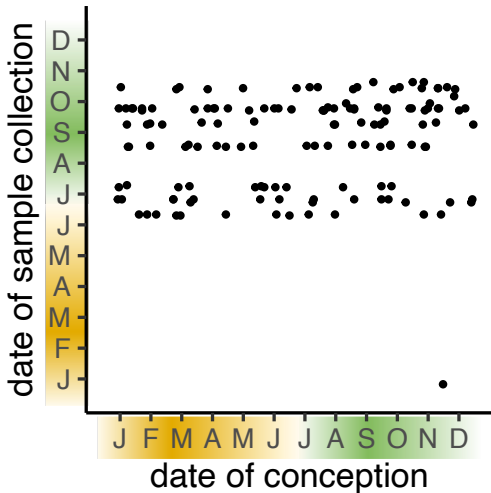

Supplement: supp [file elife-72031-supp-v1.zip › elife_poa_e72031_Appendix_1_figure_2.pdf]

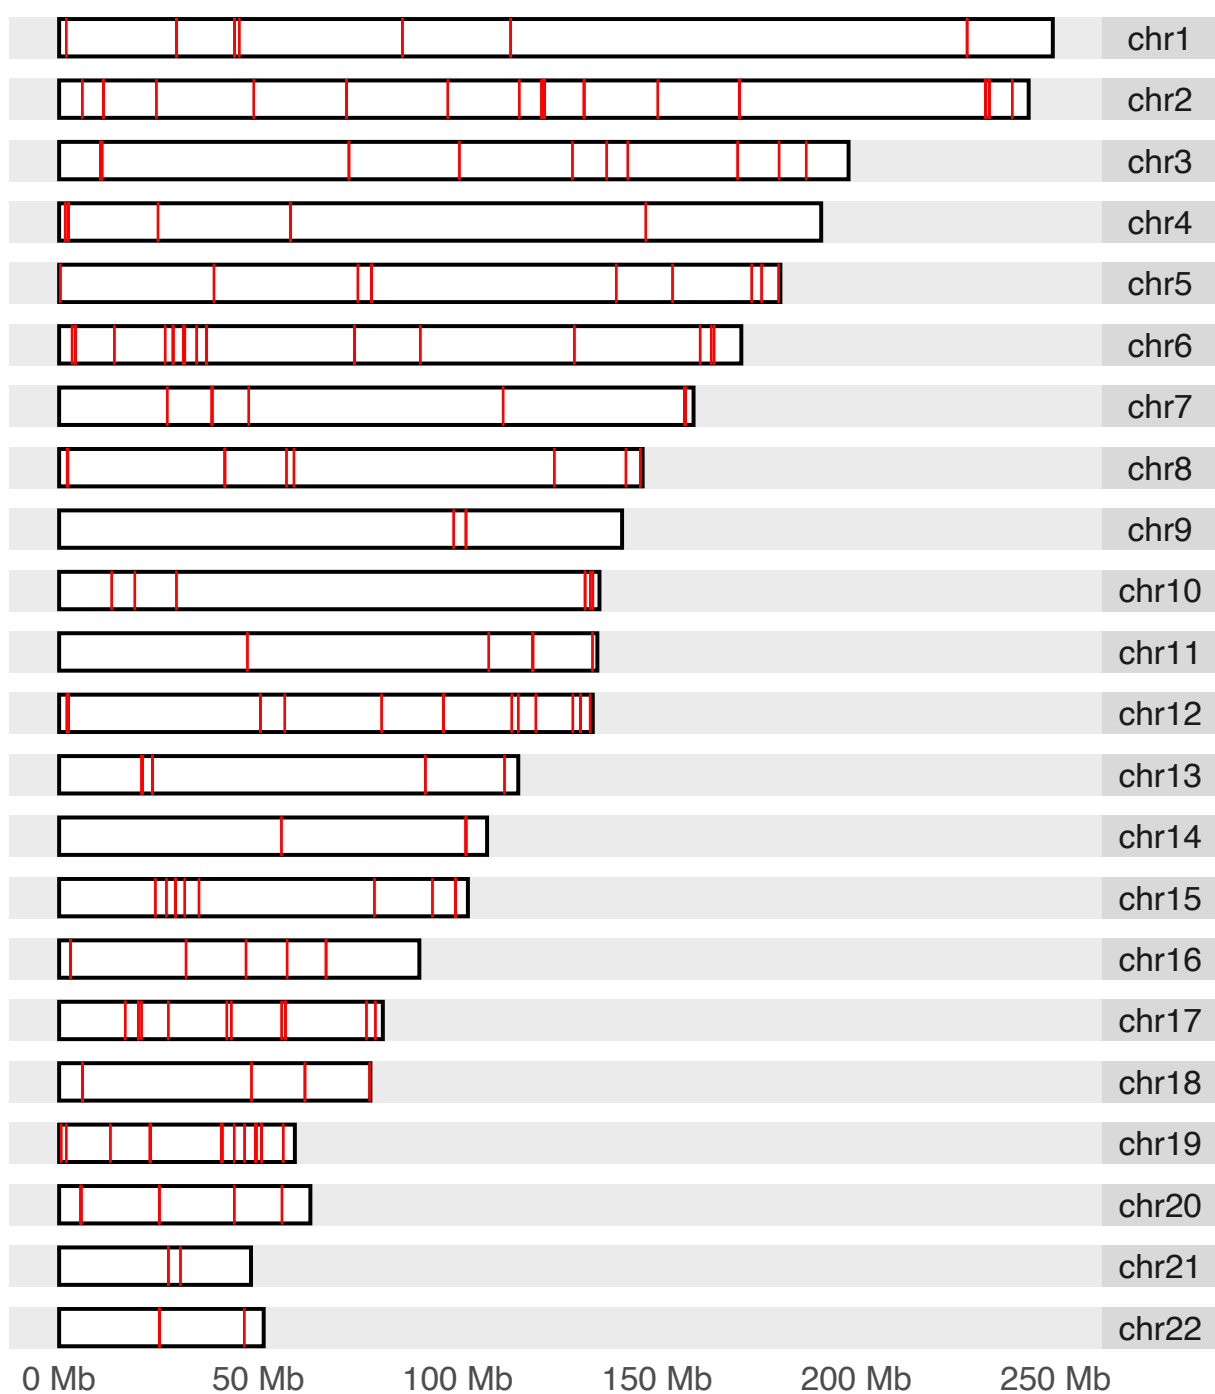

Supplement: supp [file elife-72031-supp-v1.zip › elife_poa_e72031_Appendix_1_figure_4.pdf]

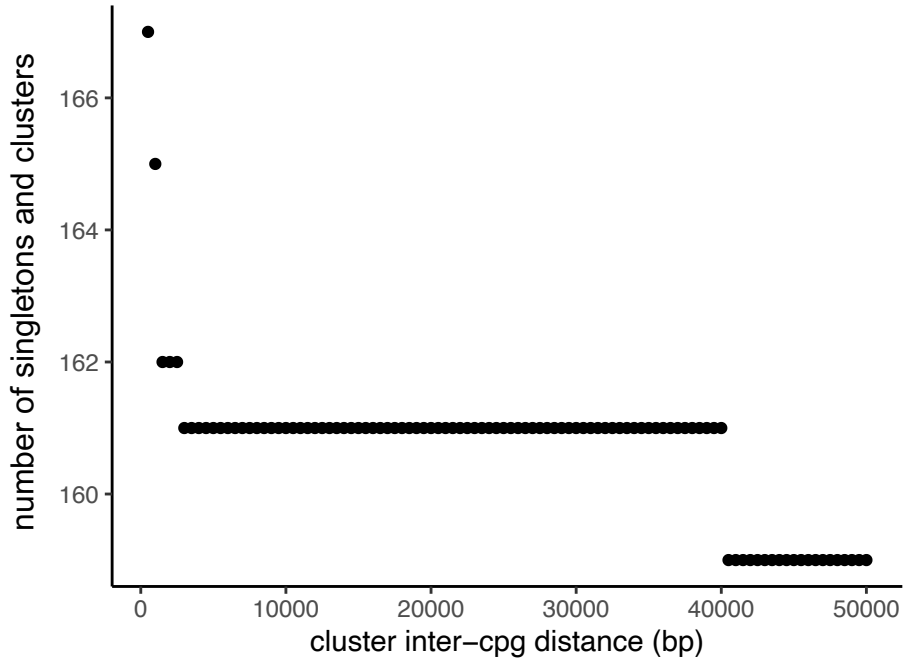

Supplement: supp [file elife-72031-supp-v1.zip › elife_poa_e72031_Appendix_1_figure_5.pdf]

in cluster

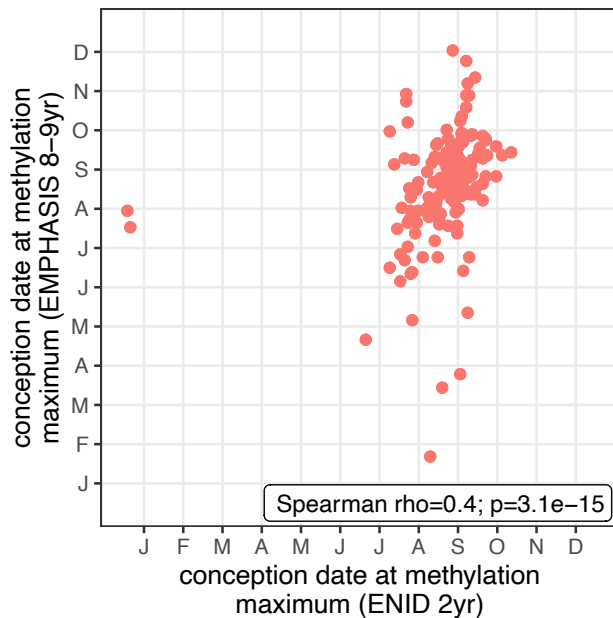

not in cluster

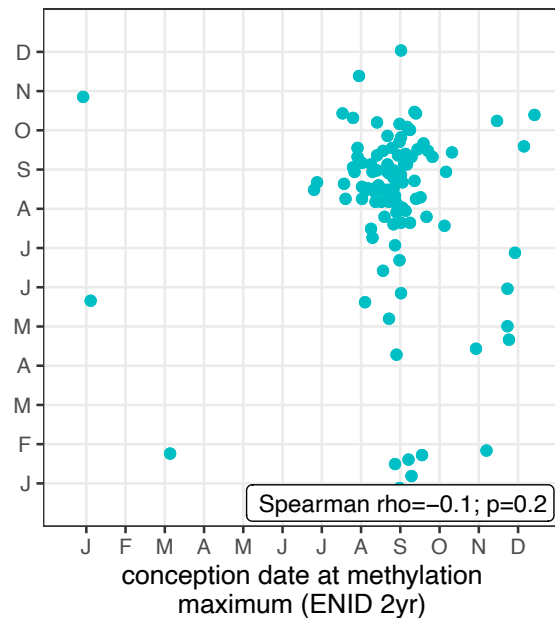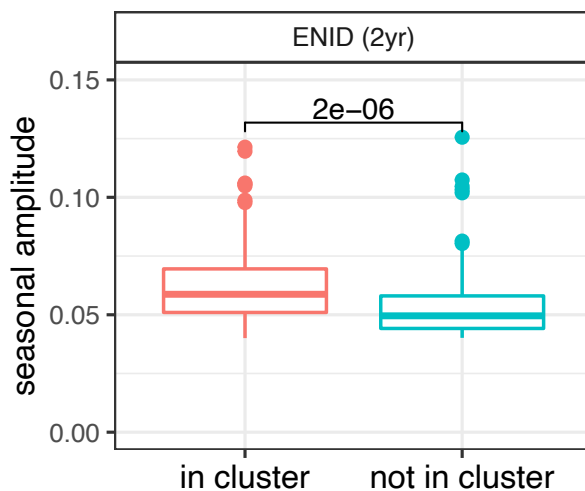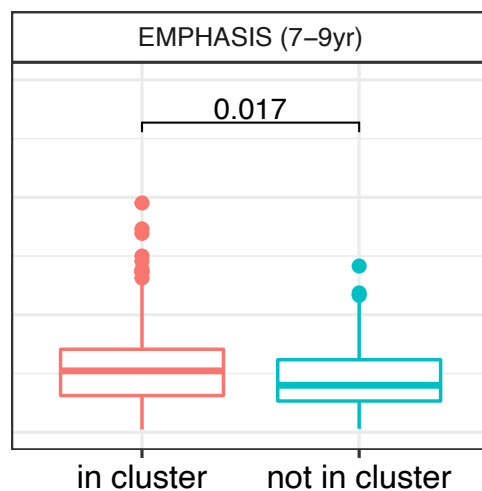

Supplement: supp [file elife-72031-supp-v1.zip › elife_poa_e72031_Appendix_1_figure_6.pdf]

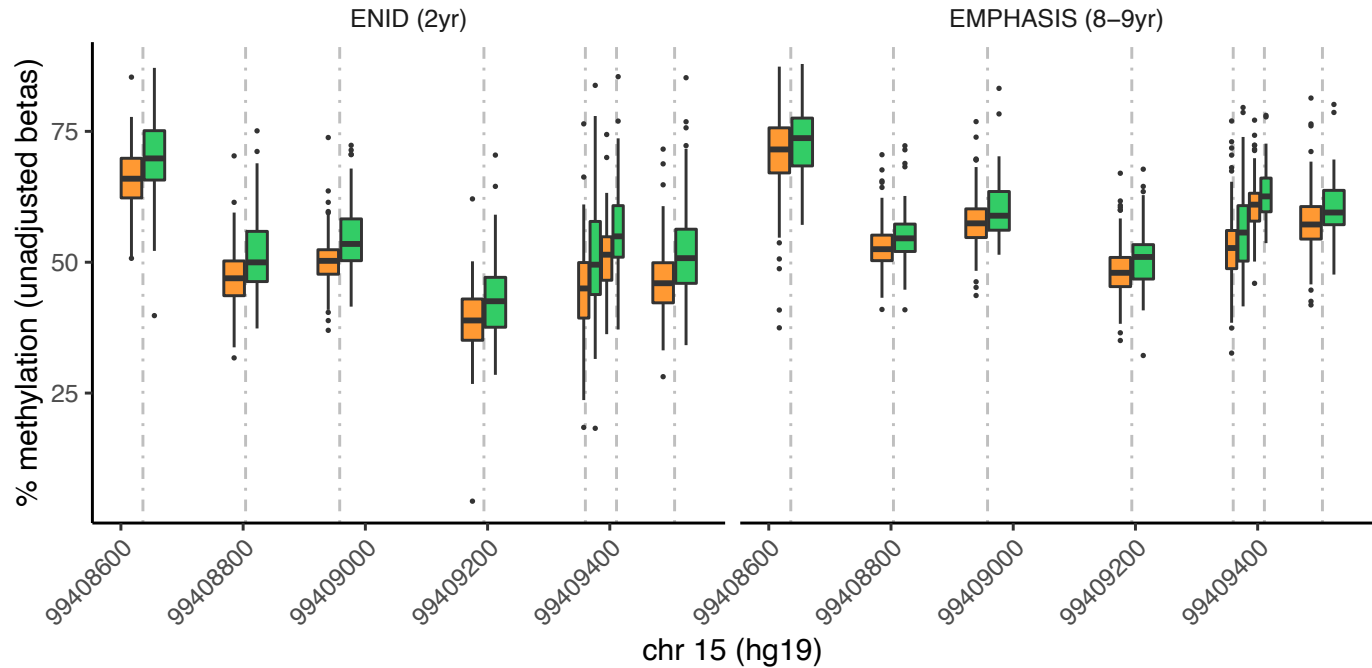

Supplement: supp [file elife-72031-supp-v1.zip › elife_poa_e72031_Appendix_1_figure_7.pdf]

Spearman  
pairwise correlation

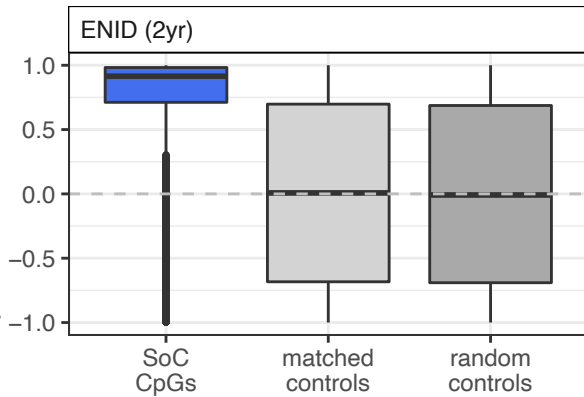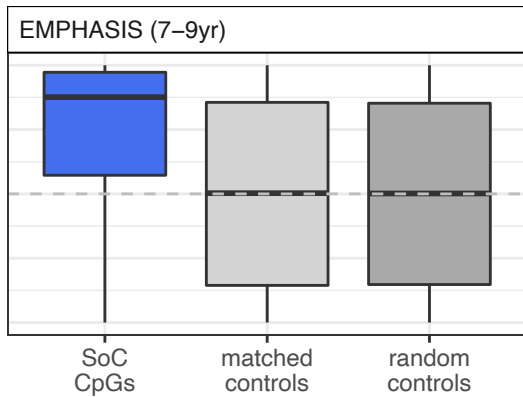

Supplement: supp [file elife-72031-supp-v1.zip › elife_poa_e72031_Appendix_1_figure_8.pdf]

EMPHASIS (8–9yr)  
mean methylation (%)

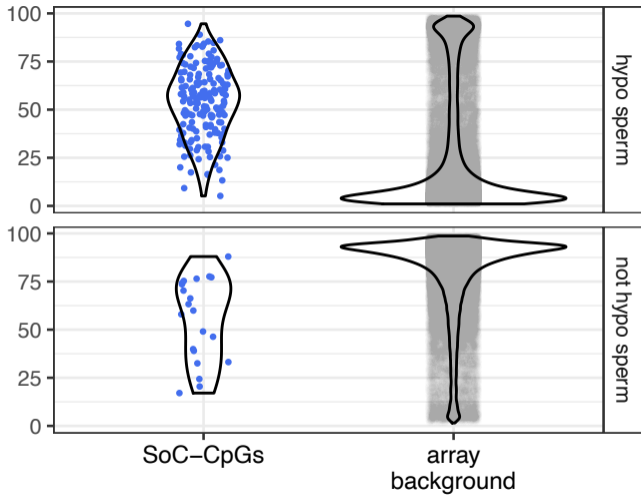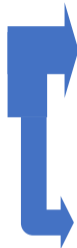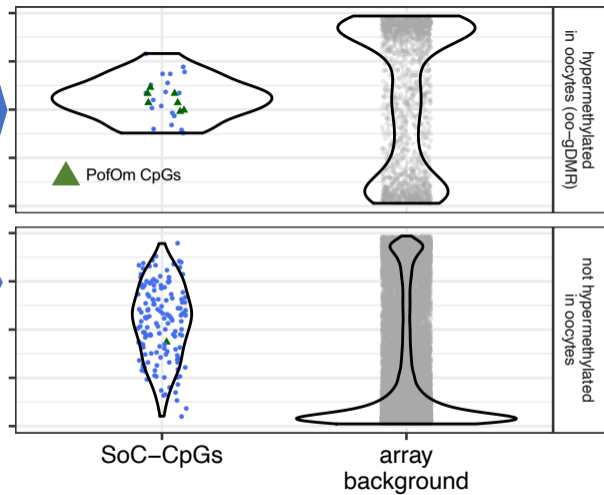

Supplement: supp [file elife-72031-supp-v1.zip › elife_poa_e72031_Appendix_1_figure_9.pdf]

## Broad peaks (259 SoC-CpGs with annotations)

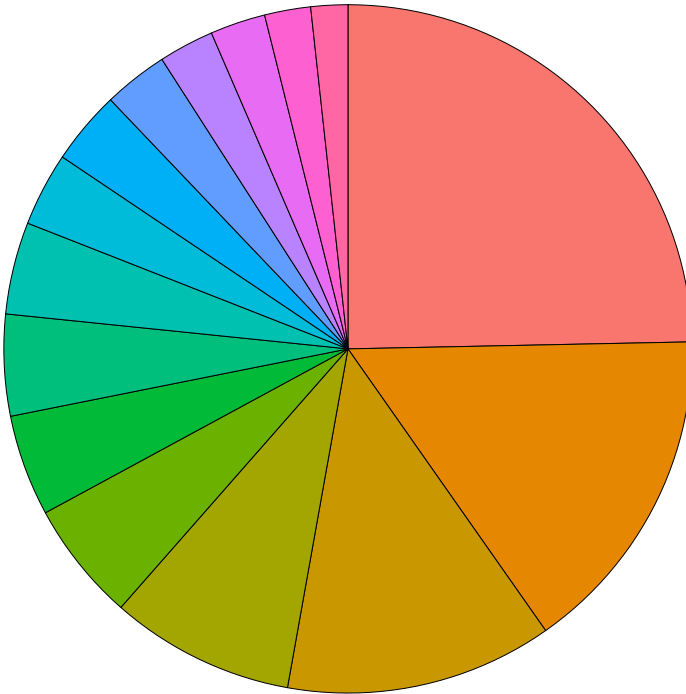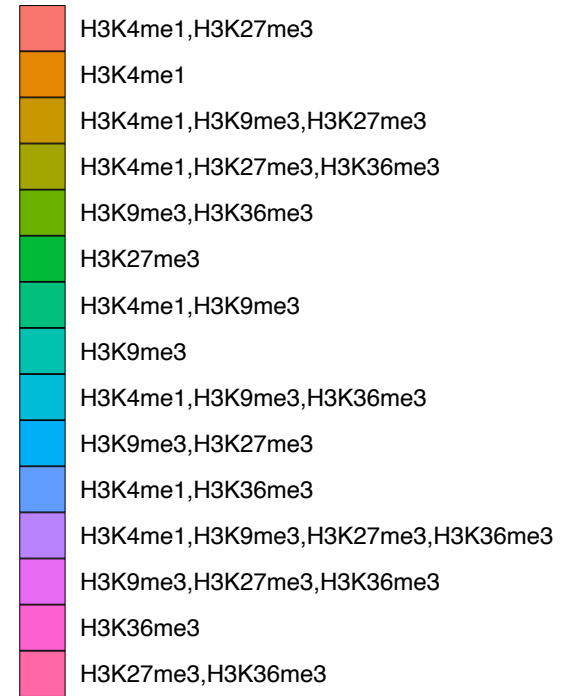

## Narrow peaks (97 SoC-CpGs with annotations)

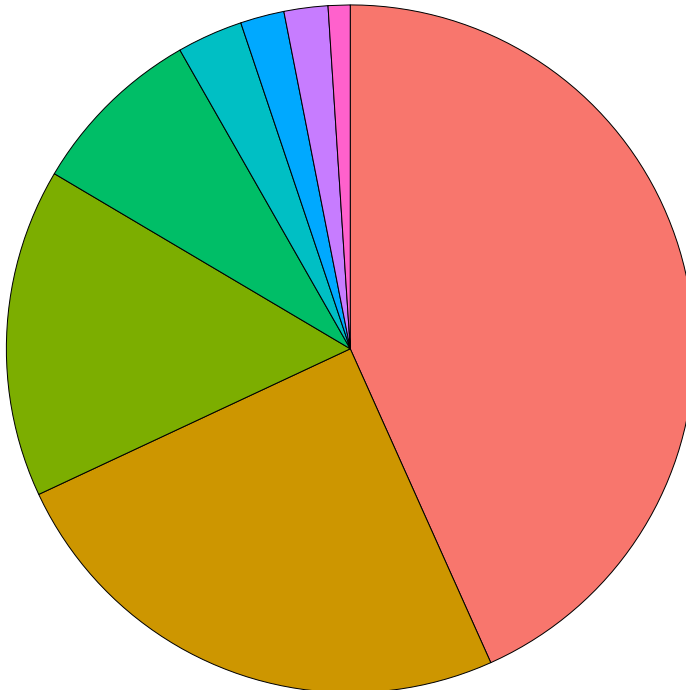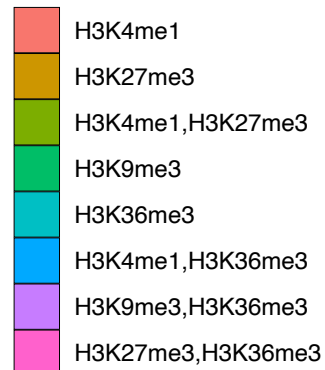

Supplement: supp [file elife-72031-supp-v1.zip › elife_poa_e72031_Appendix_1_figure_10.pdf]

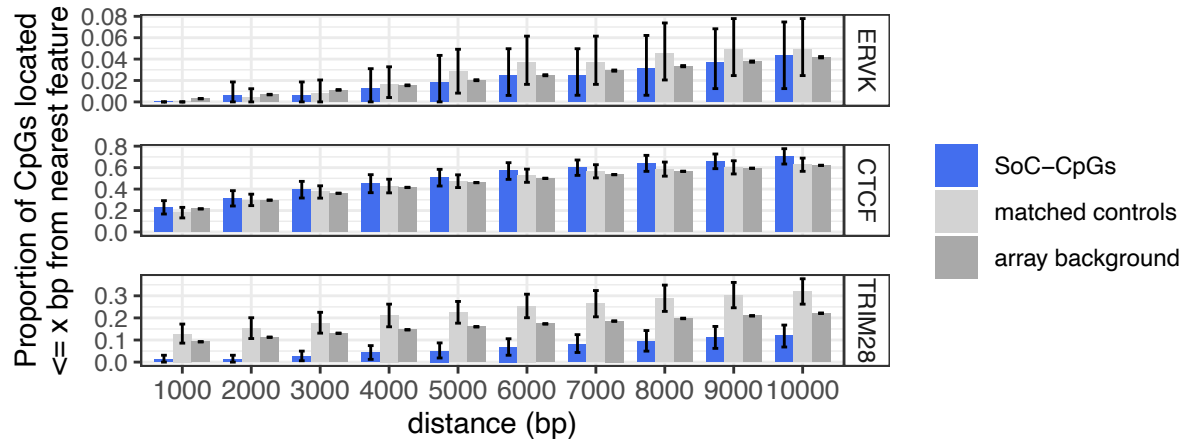

Supplement: supp [file elife-72031-supp-v1.zip › elife_poa_e72031_Appendix_1_figure_11.pdf]

**A**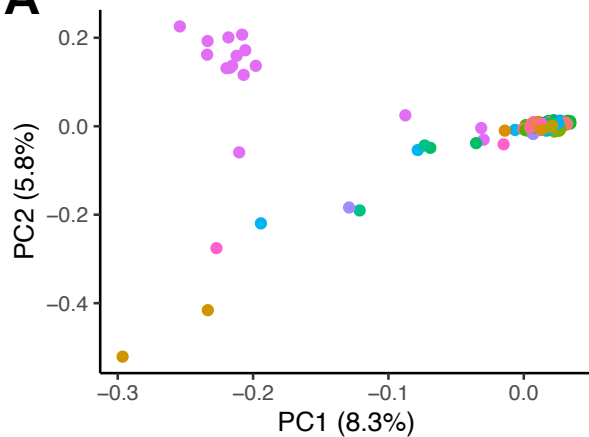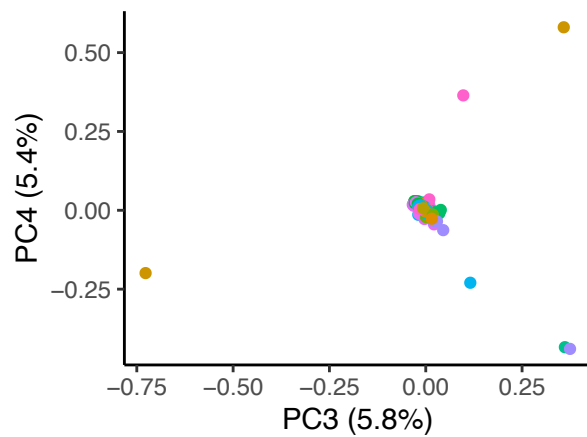**B**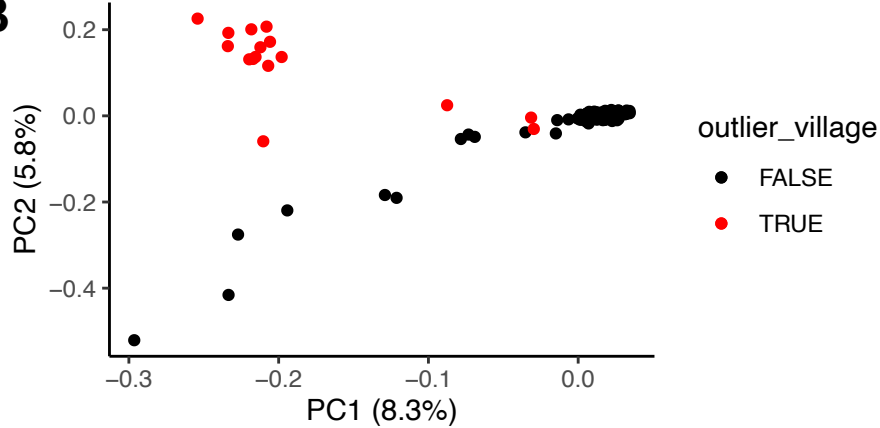

Supplement: supp [file elife-72031-supp-v1.zip › elife_poa_e72031_Appendix_1_figure_12.pdf]

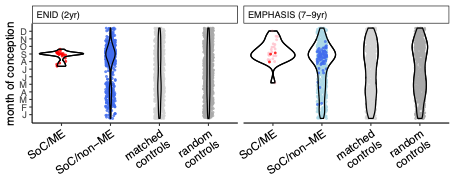

Supplement: supp [file elife-72031-supp-v1.zip › elife_poa_e72031_Appendix_1_figure_13.png]

mean-centred methylation (%)

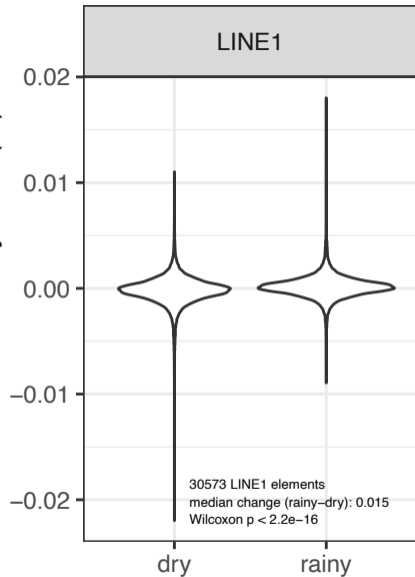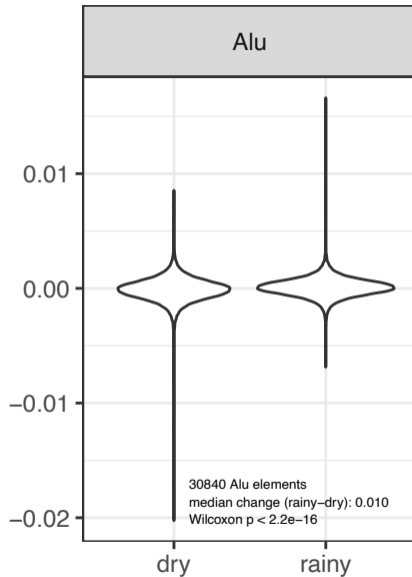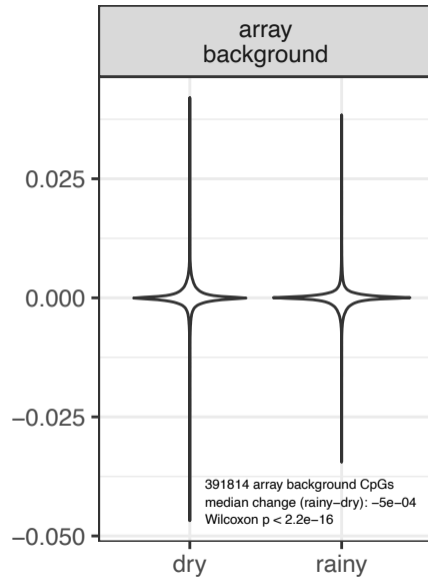

dichotomised season of conception

Supplement: supp [file elife-72031-supp-v1.zip › elife_poa_e72031_Appendix_1_figure_15.pdf]

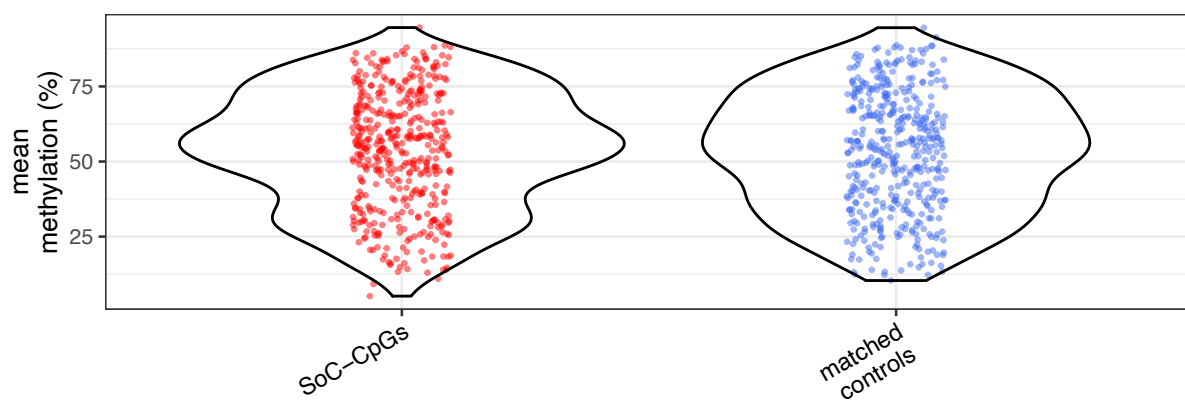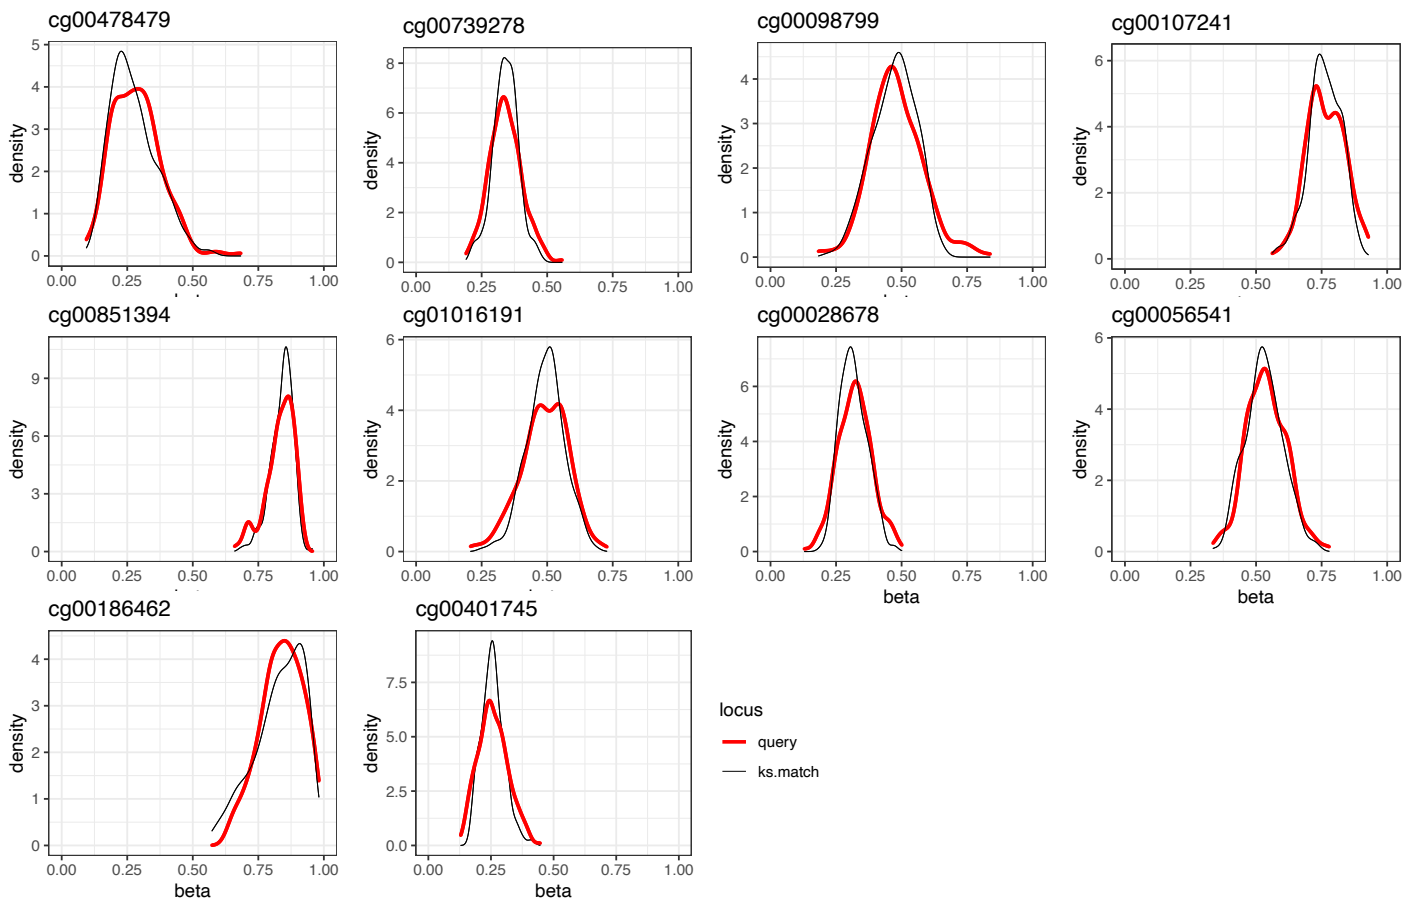

Supplement: supp [file elife-72031-supp-v1.zip › elife_poa_e72031_Appendix_1_figure_16.pdf]
